# Supplementary material for: The use of Twitter by state leaders and its impact on the public during the COVID-19 pandemic
Source: PubMed Central journal article supplement (PMC7695954; doi:10.1016/j.heliyon.2020.e05540), 2020-11-19

# Prime Minister Narendra Modi (India)

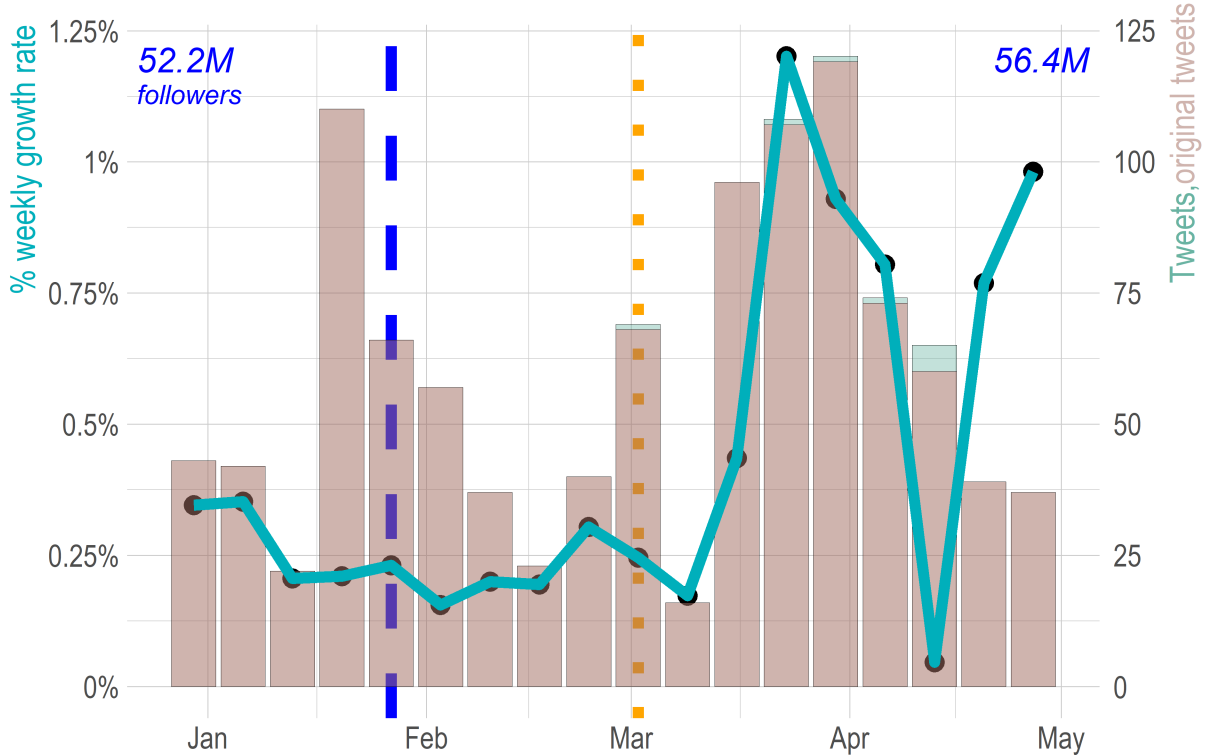

# President Recep Tayyip Erdoğan (Turkey)

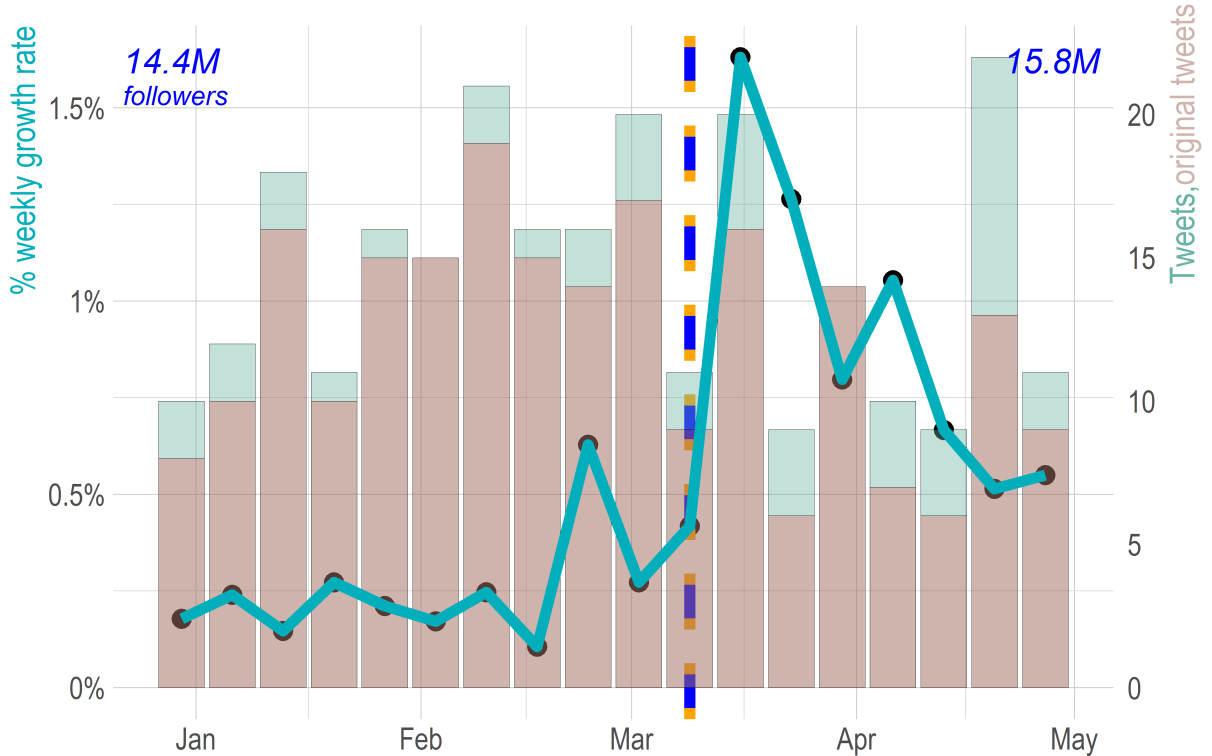

# President Joko Widodo (Indonesia)

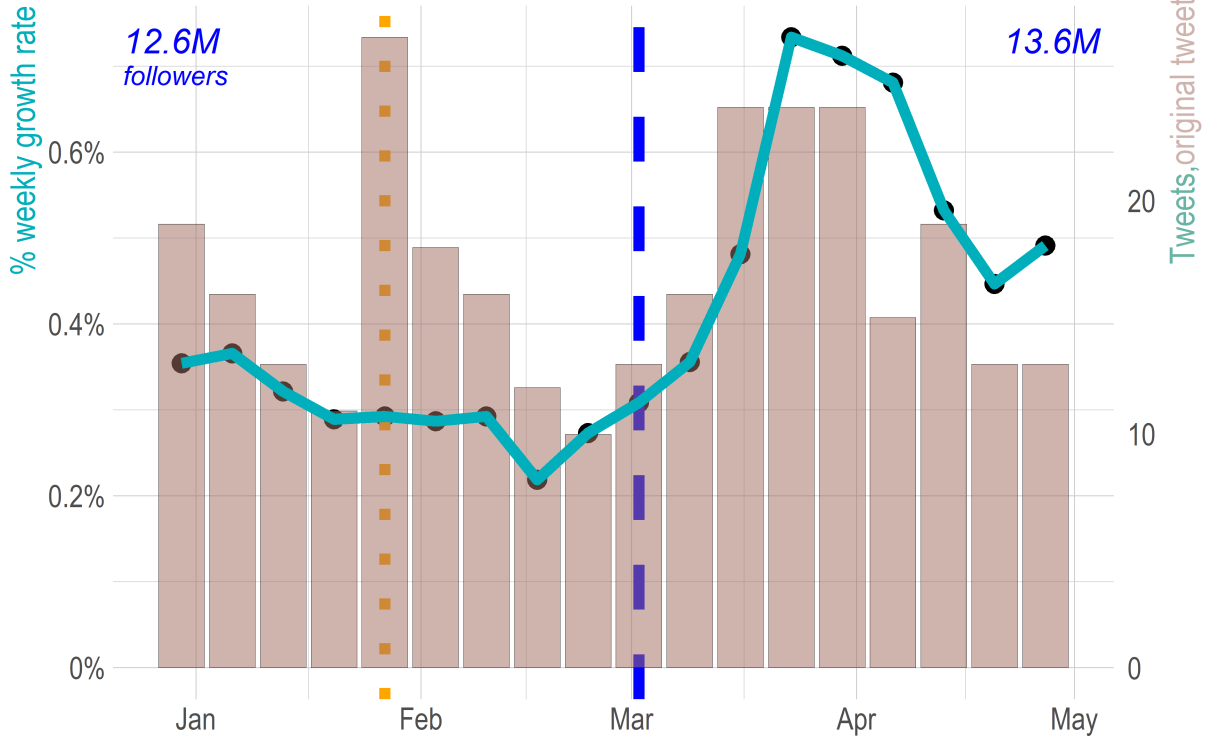

# Prime Minister Imran Khan (Pakistan)

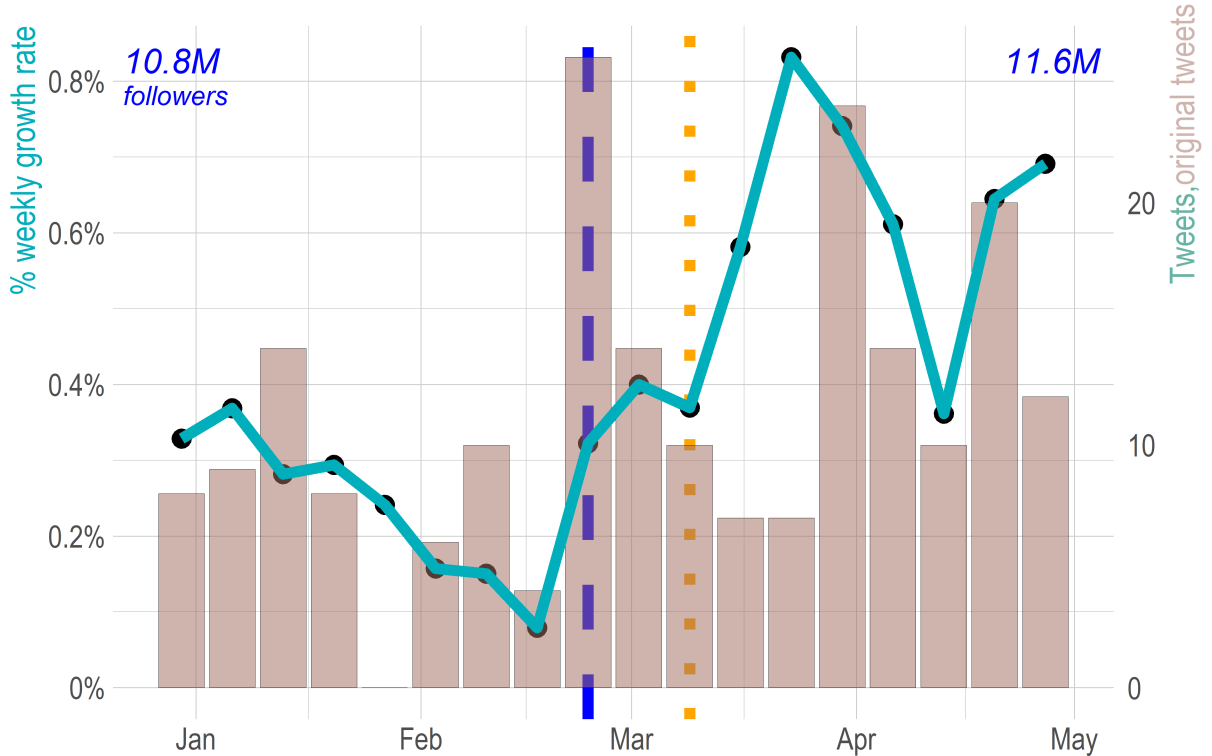

# Sheikh Mohammed (United Arab Emirates)

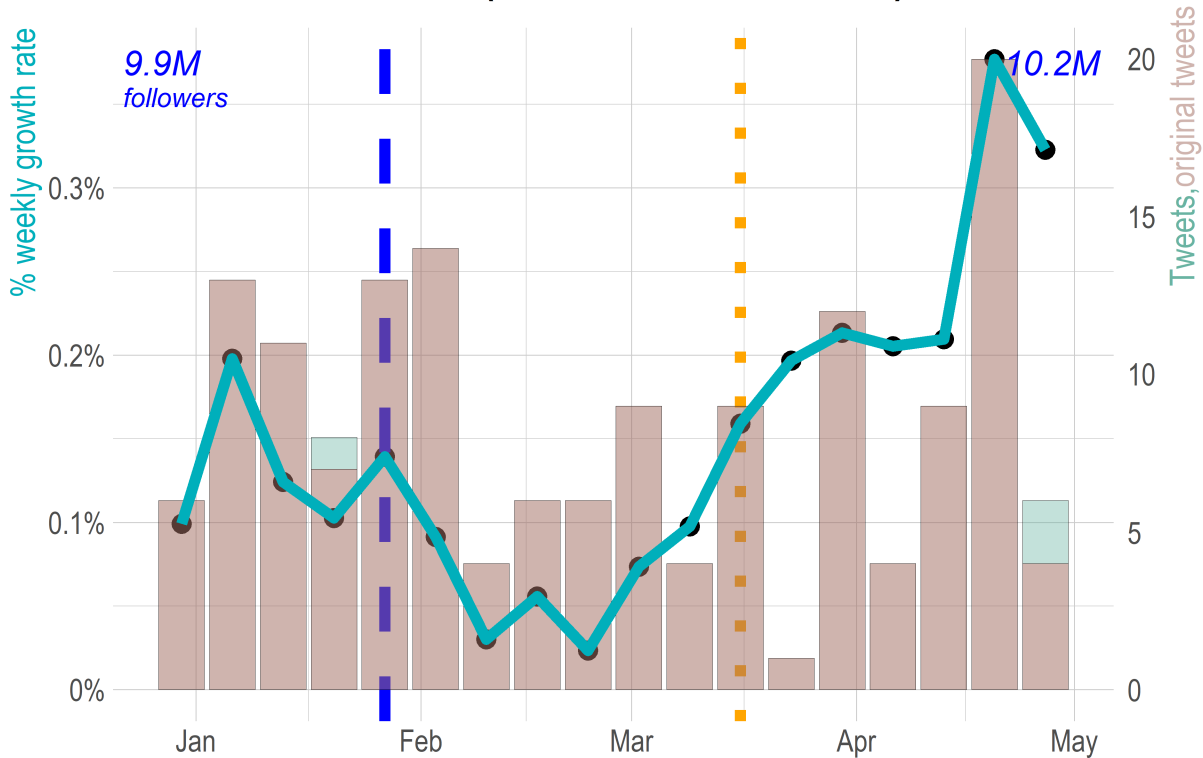

# King Salman bin Abdulaziz Al Saud (Saudi Arabia)

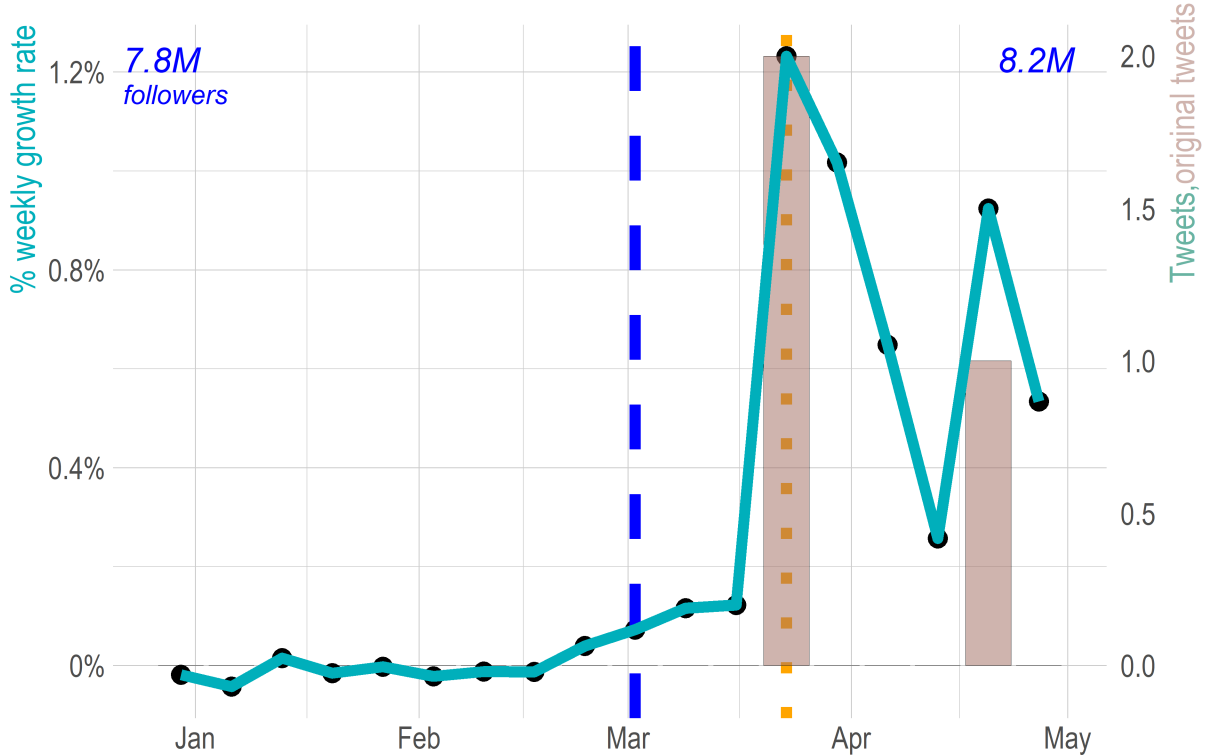

# President Andrés Manuel López Obrador (Mexico)

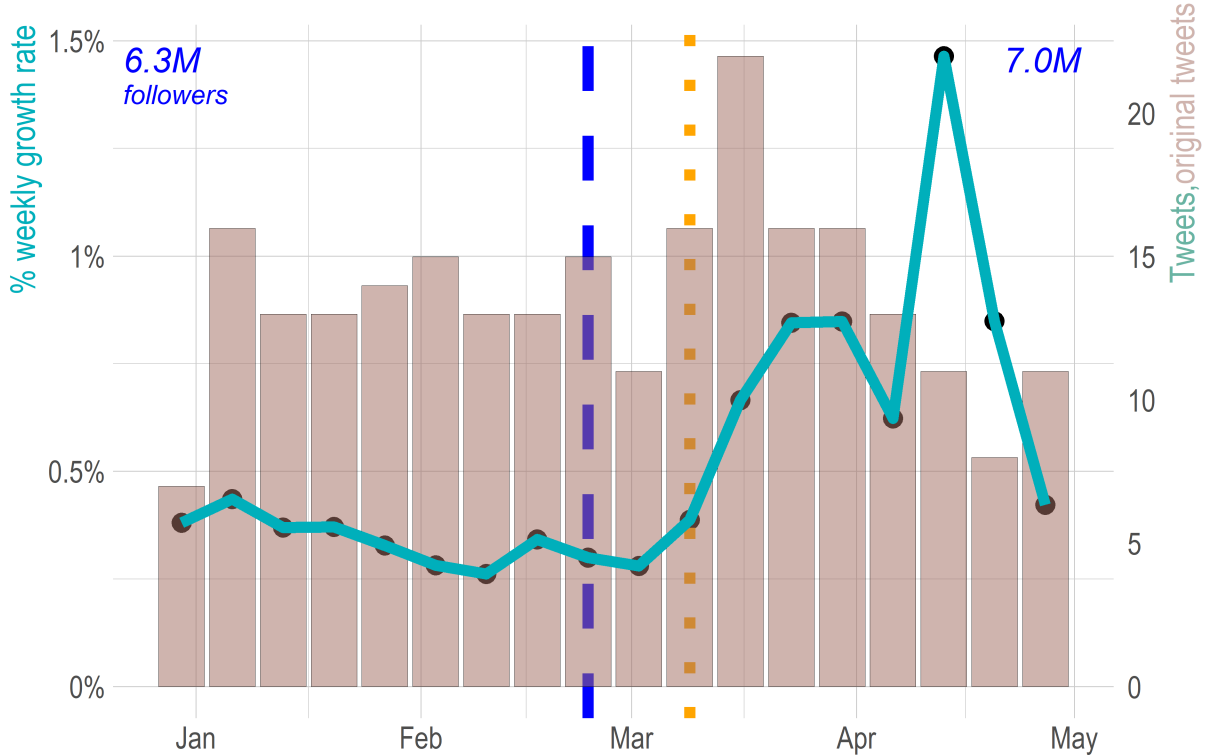



# President Jair Messias Bolsonaro (Brazil)

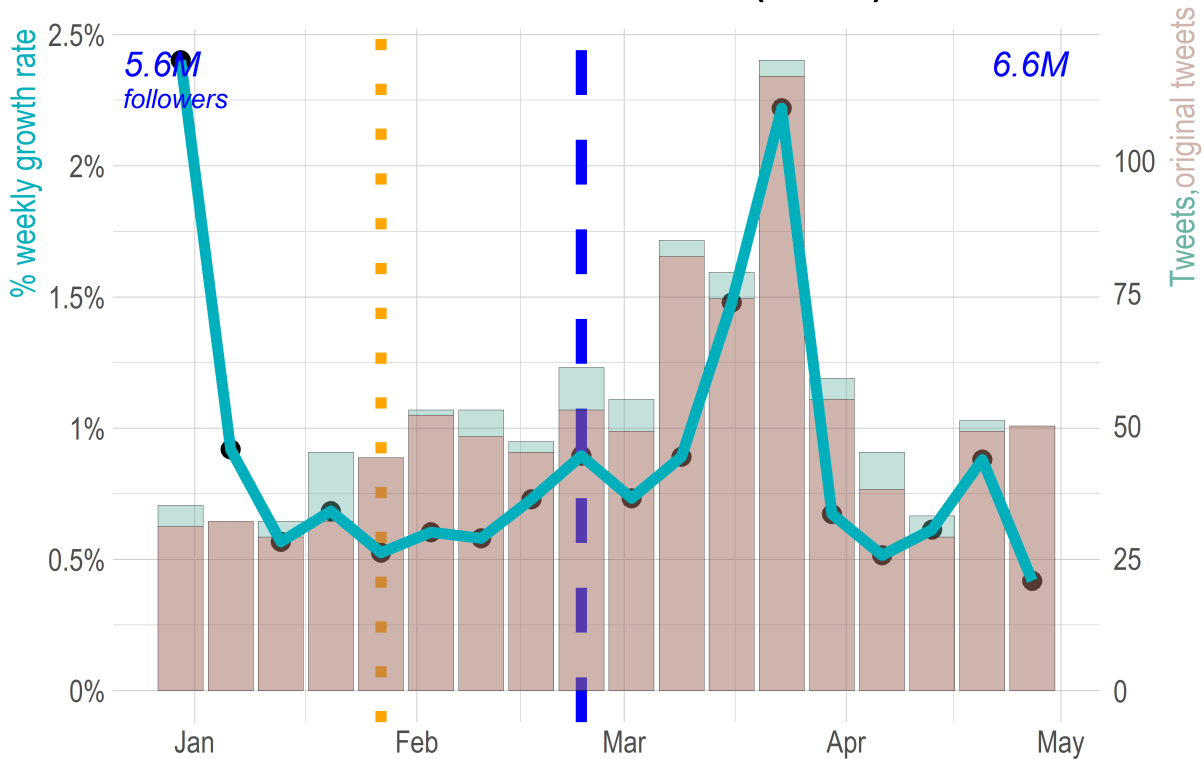

# Prime Minister Justin Trudeau (Canada)

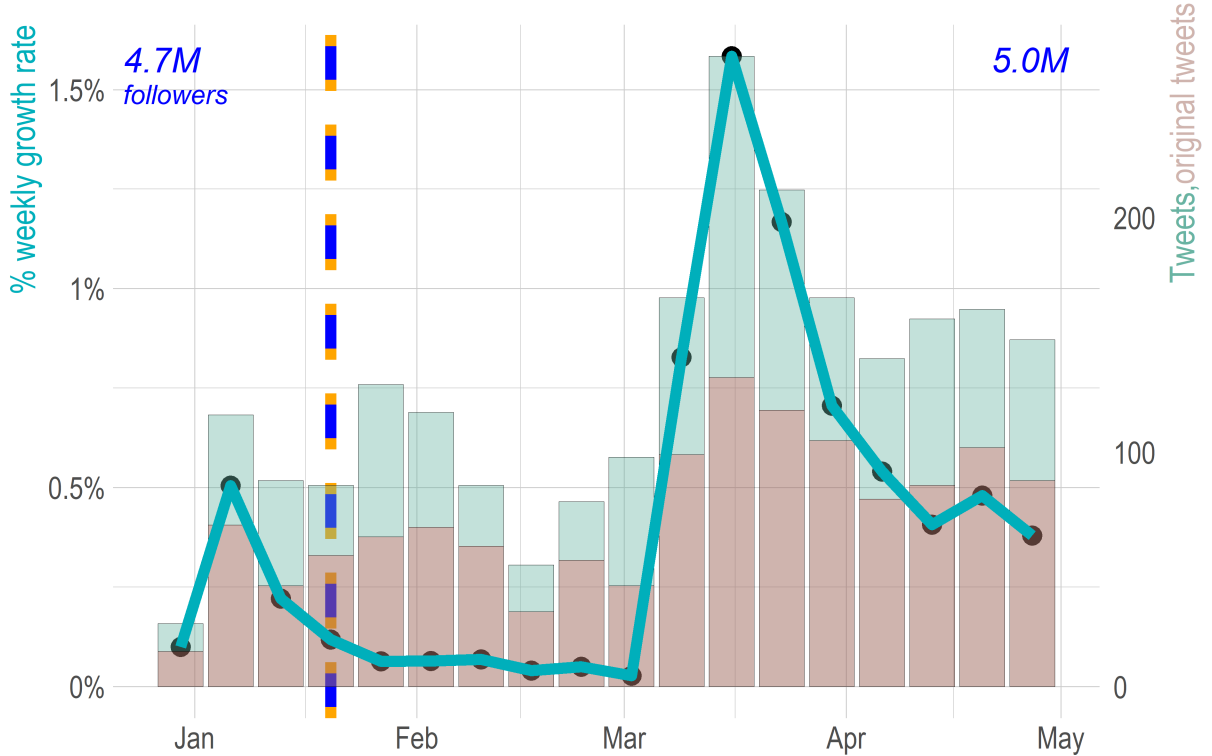

# President Emmanuel Macron (France)

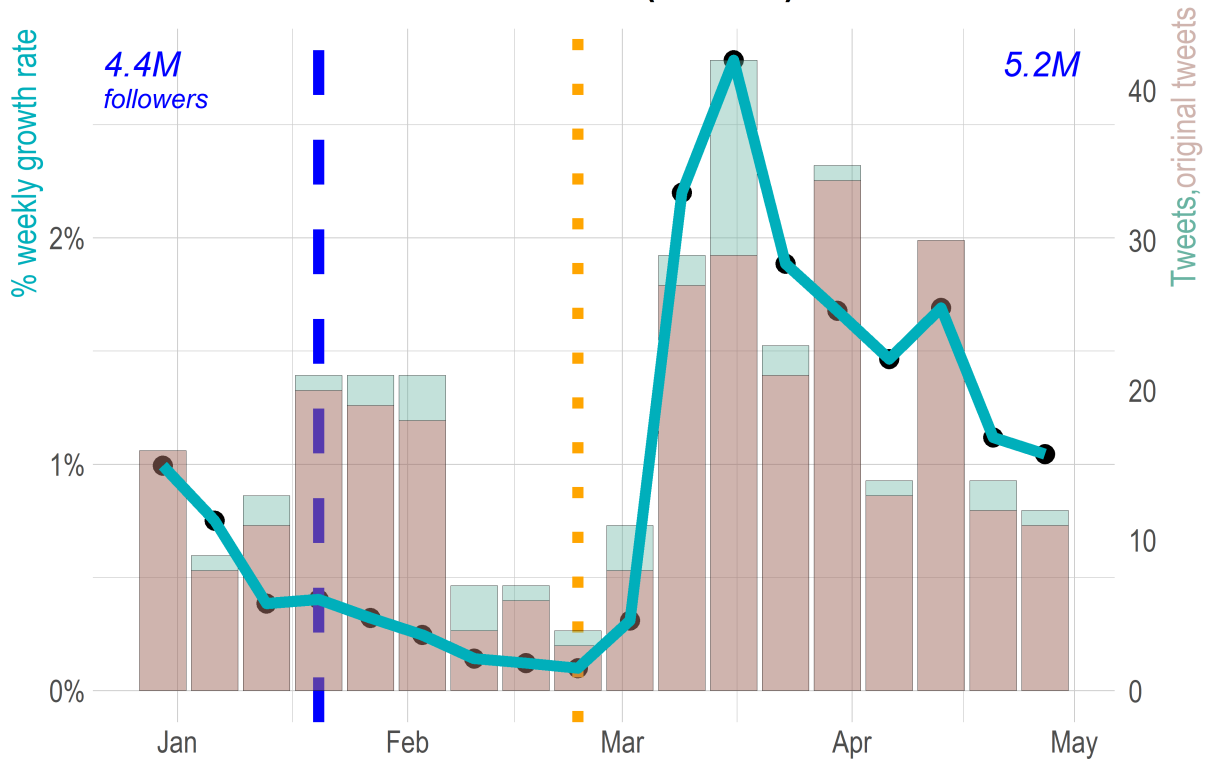



# President Abdel Fattah el-Sisi (Egypt)

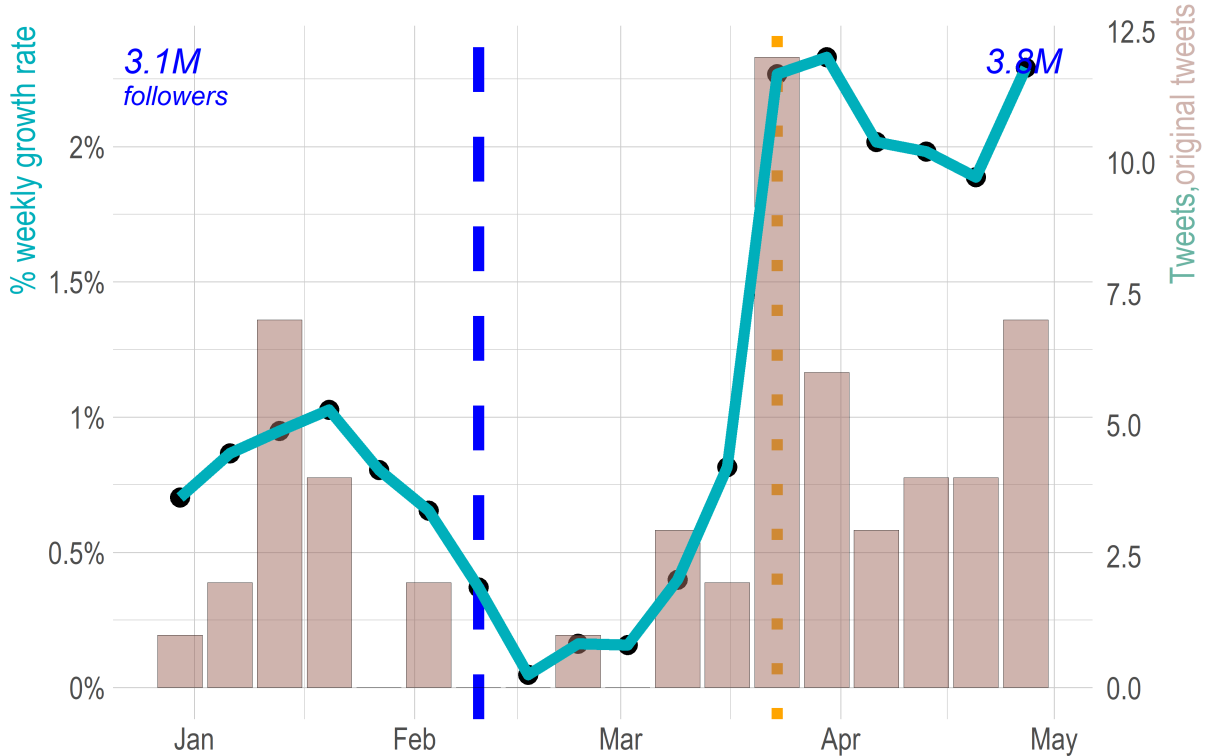

# President Muhammadu Buhari (Nigeria)

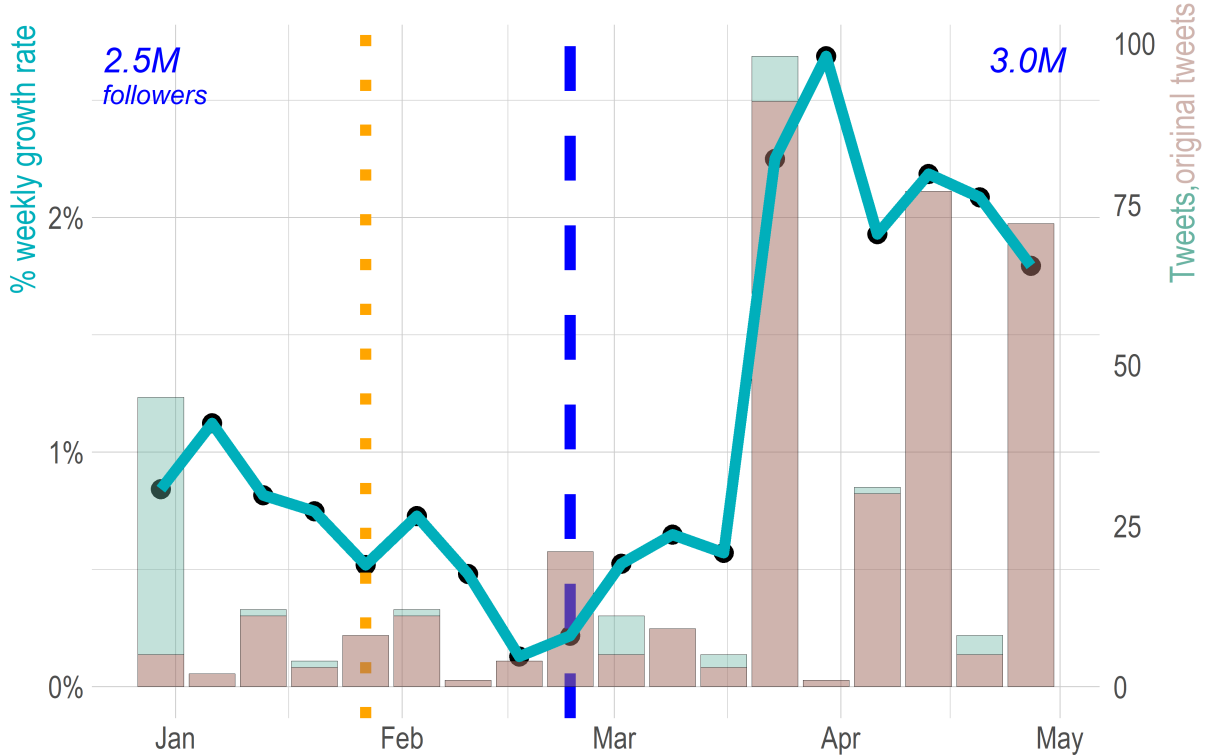

# President Sebastian Piñera (Chile)

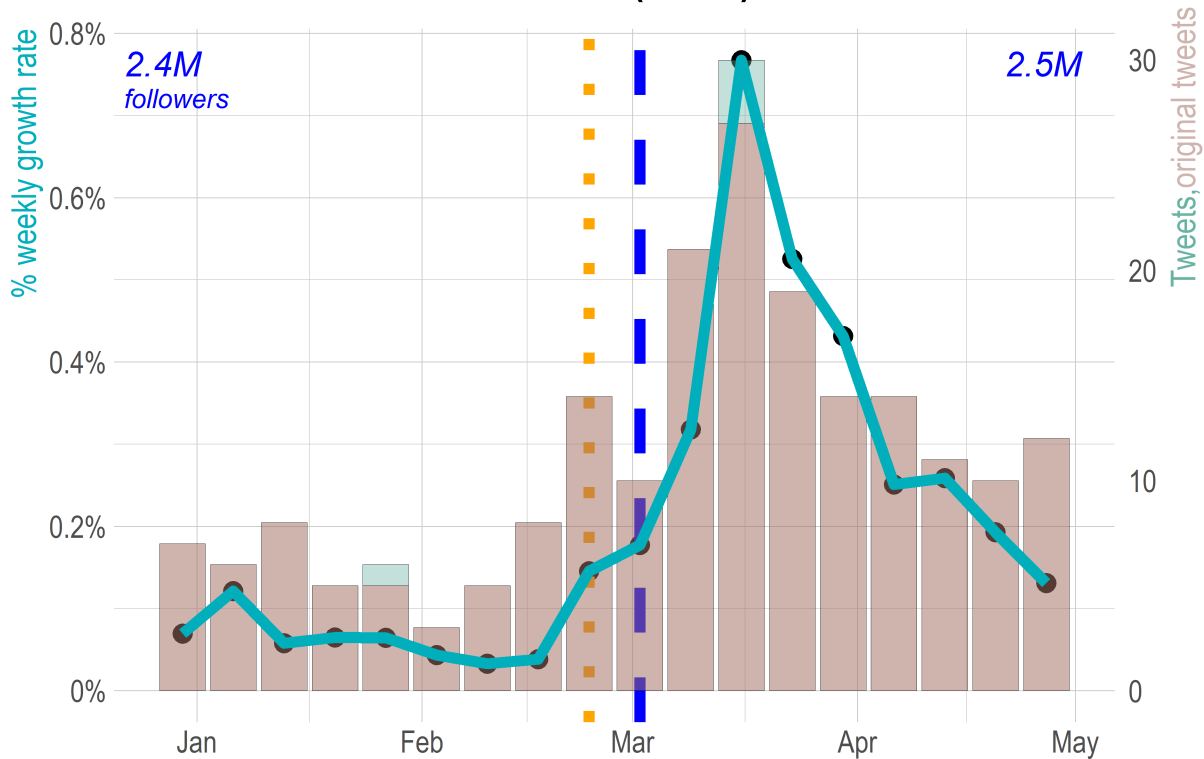

# President Moon Jae-in (South Korea)

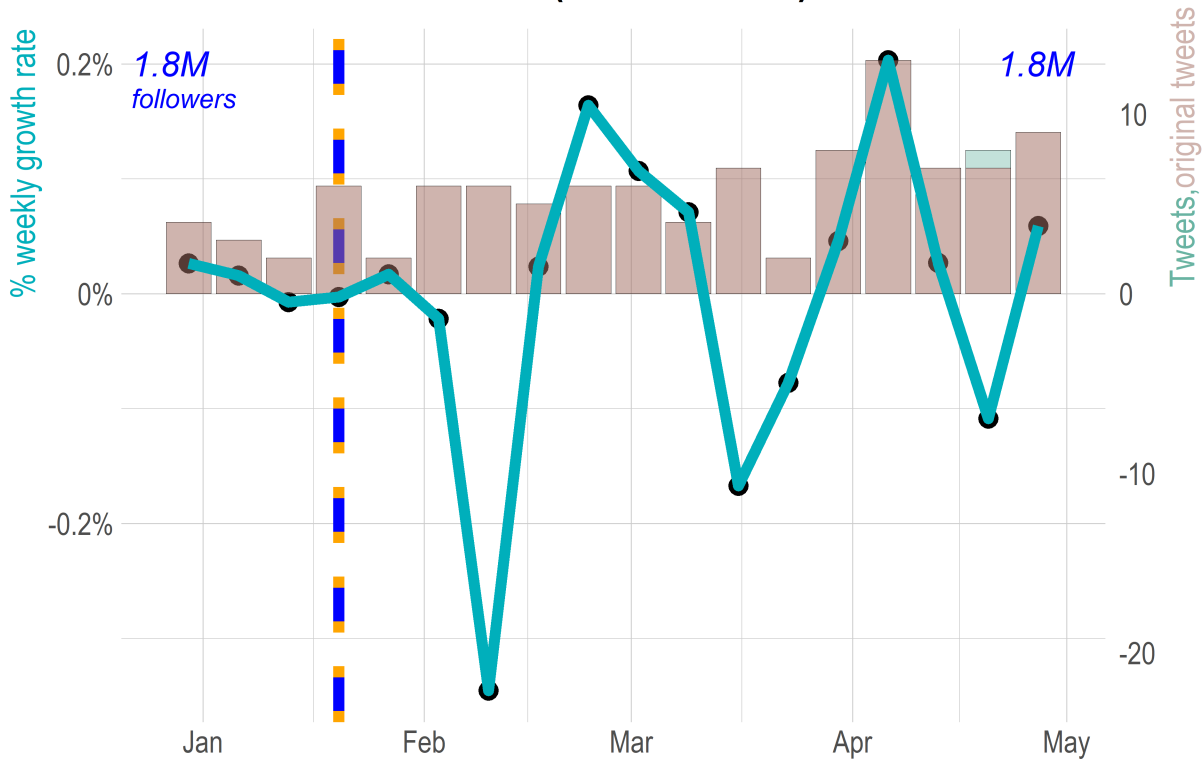



# Prime Minister Benjamin Netanyahu (Israel)

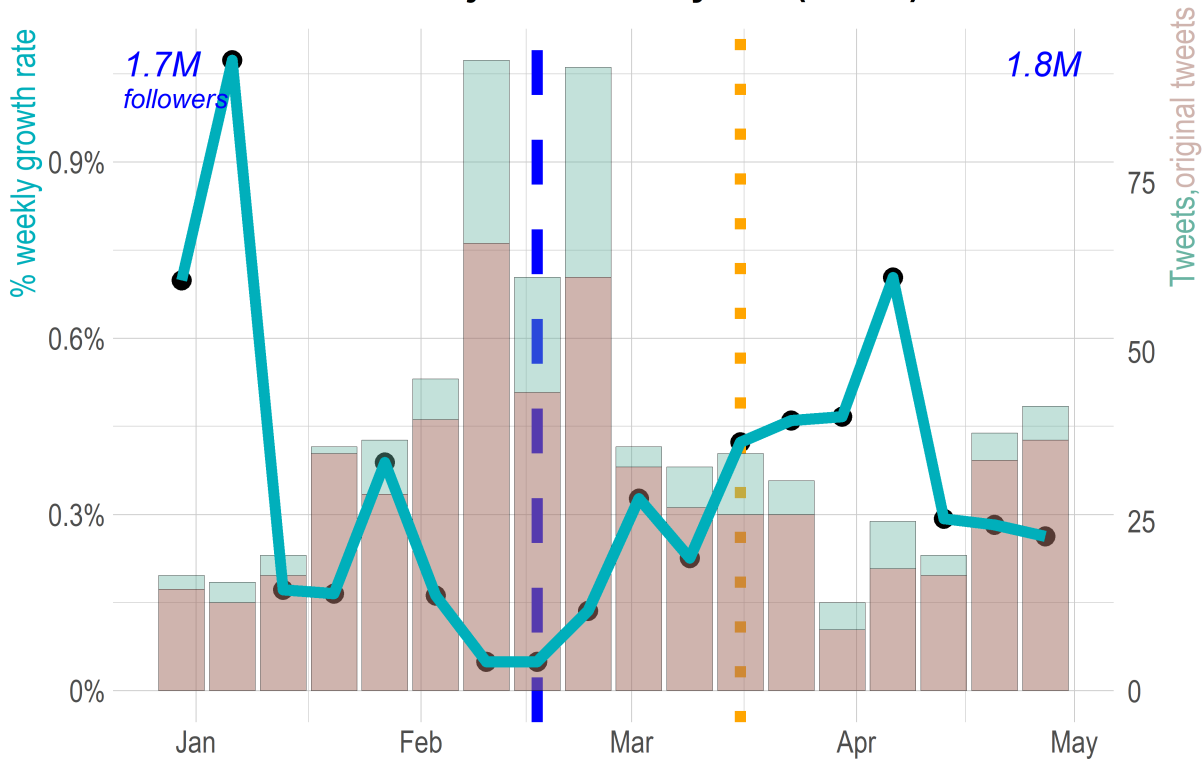

# King Abdullah II (Jordan)

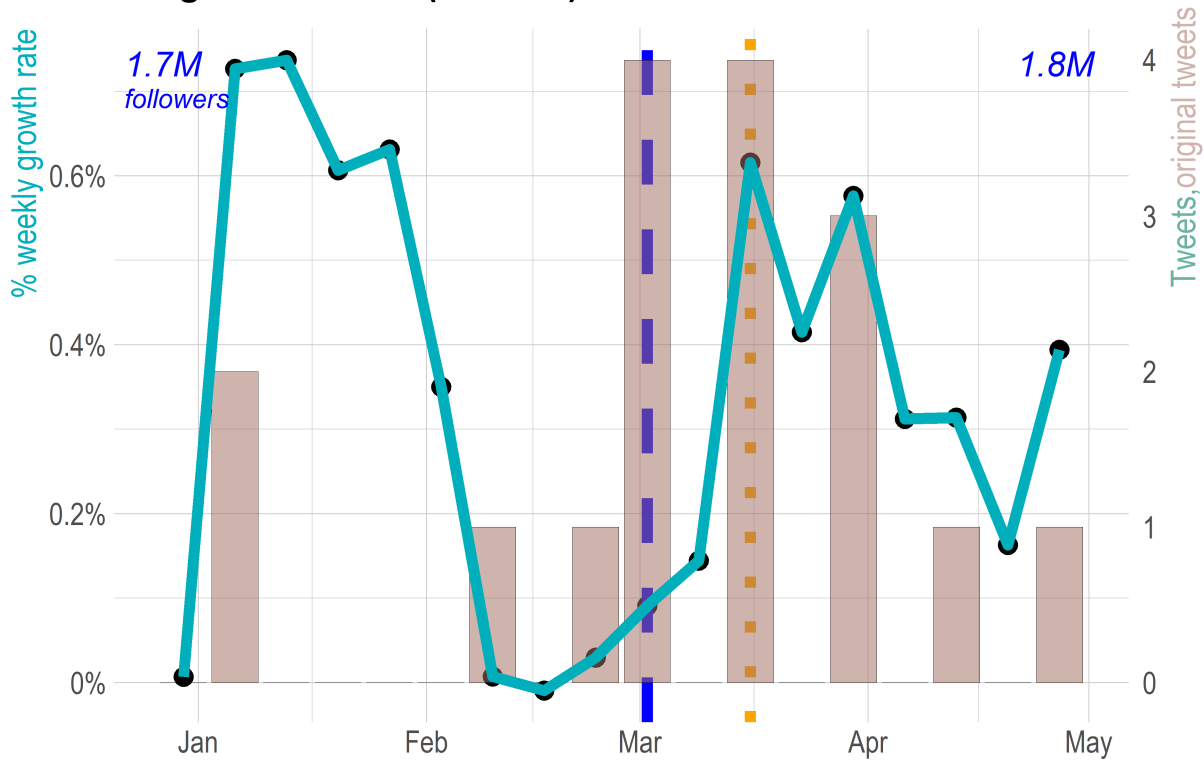

# Prime Minister Abe Shinzo (Japan)

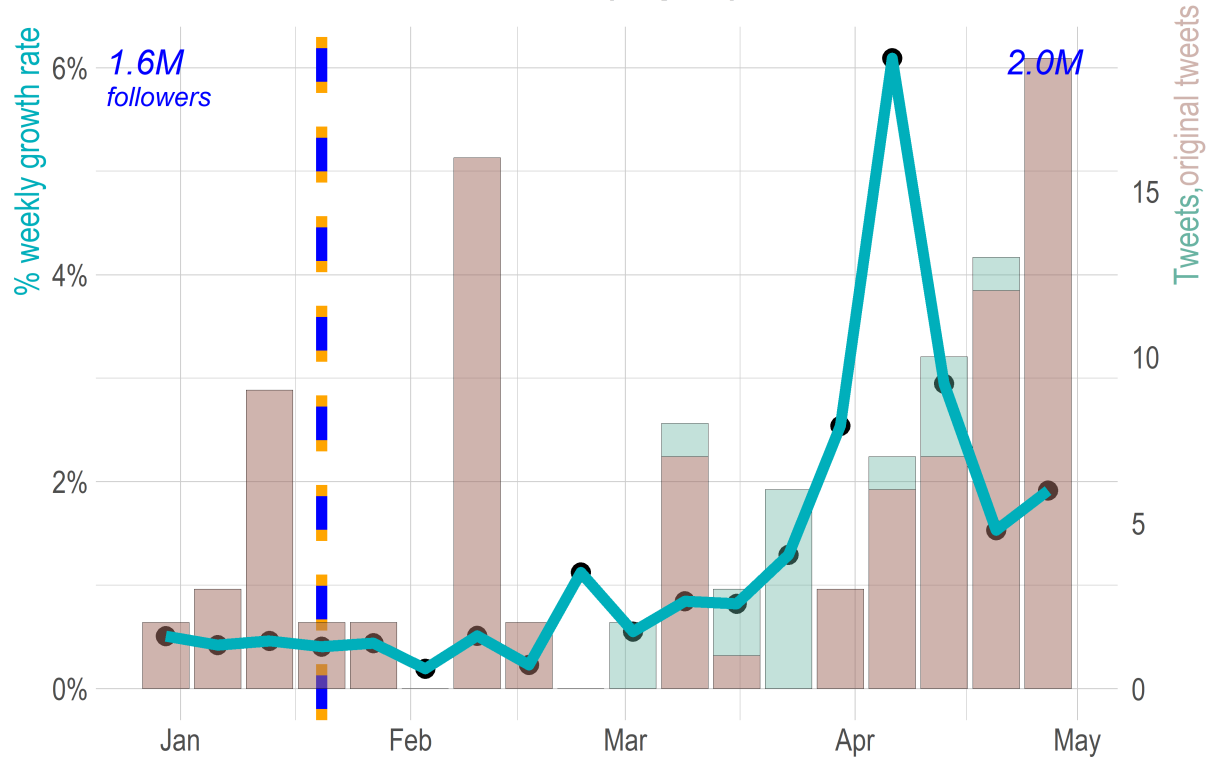

# President Paul Kagame (Rwanda)

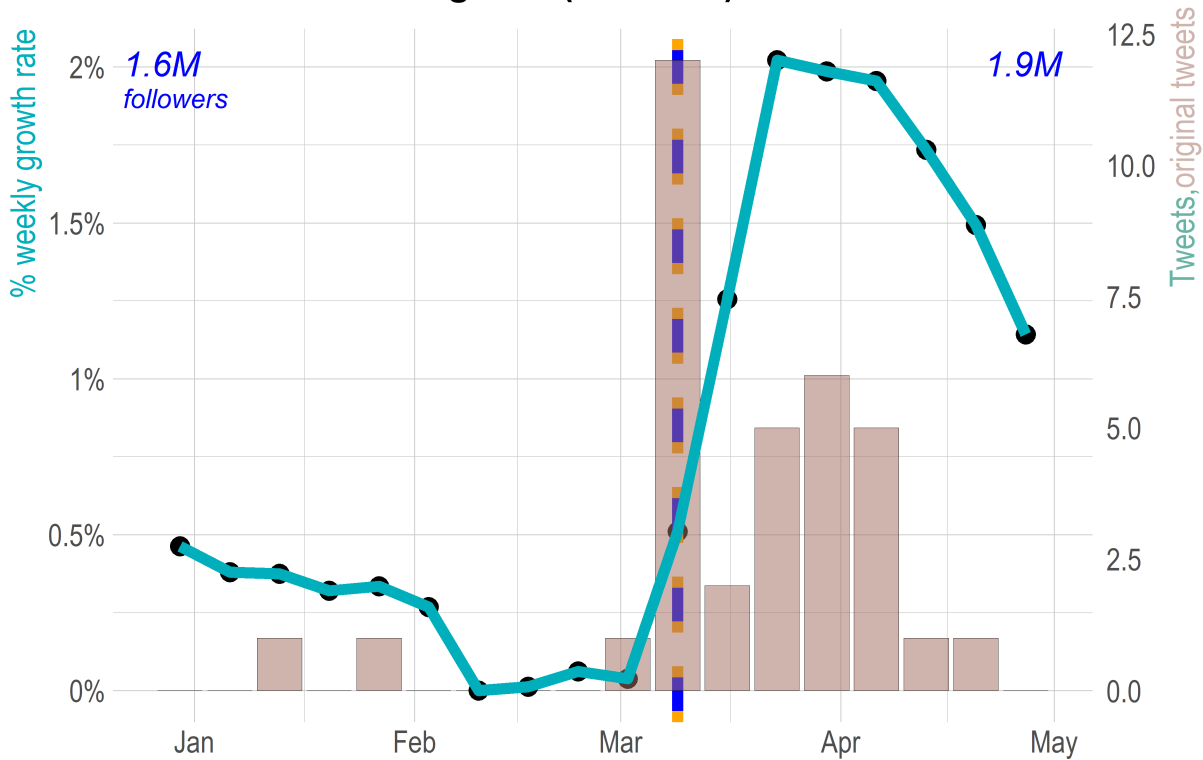

# Prime Minister Boris Johnson (United Kingdom)

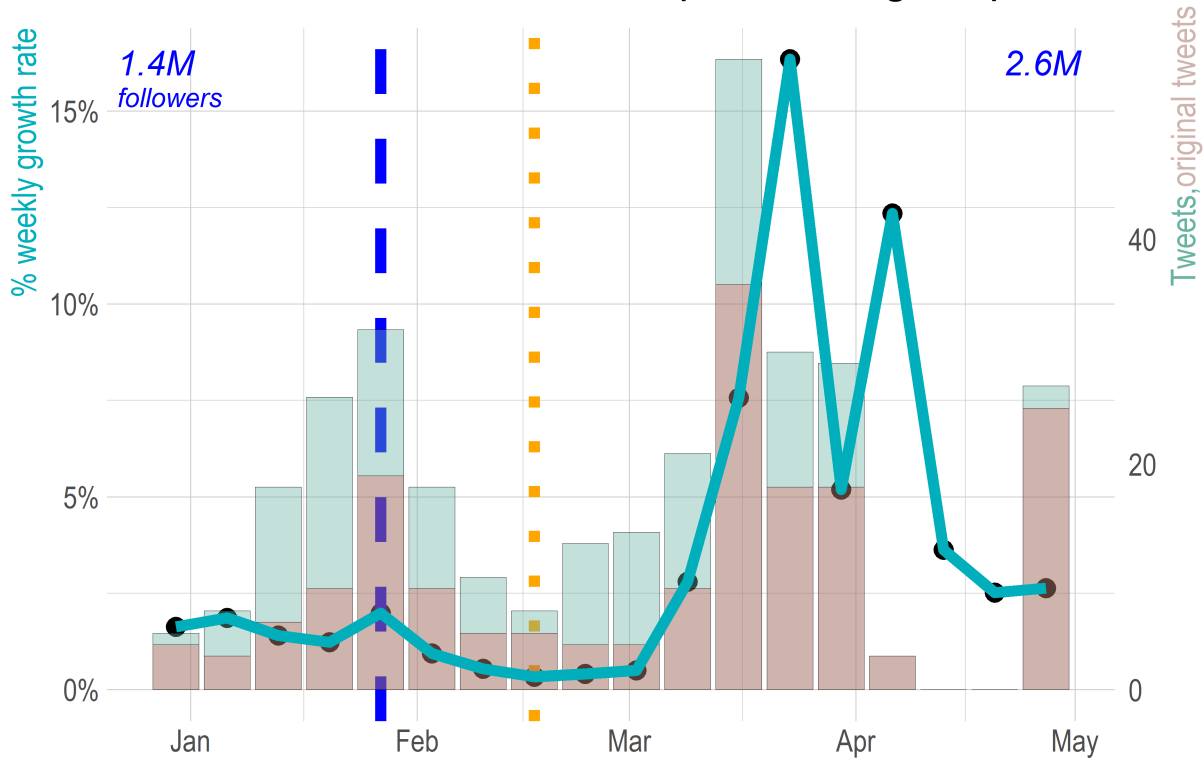

# President Yoweri Museveni (Uganda)

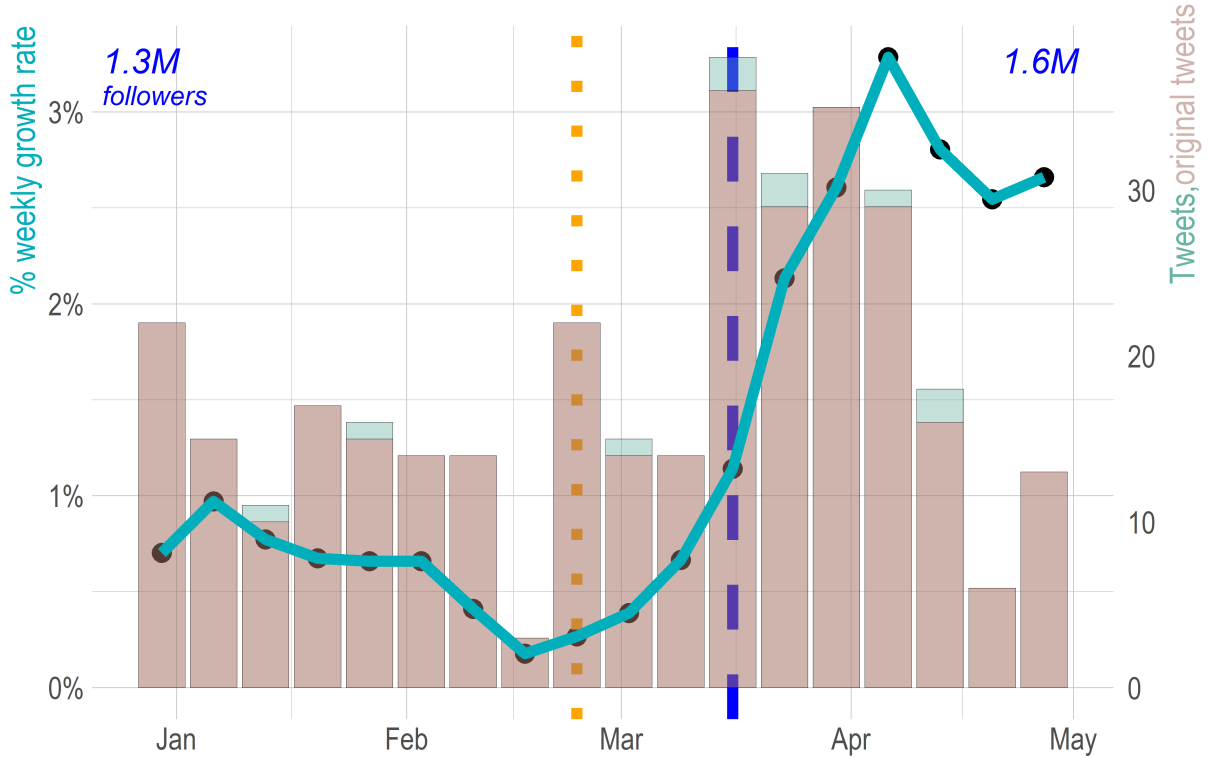

# President Nayib Bukele (El Salvador)

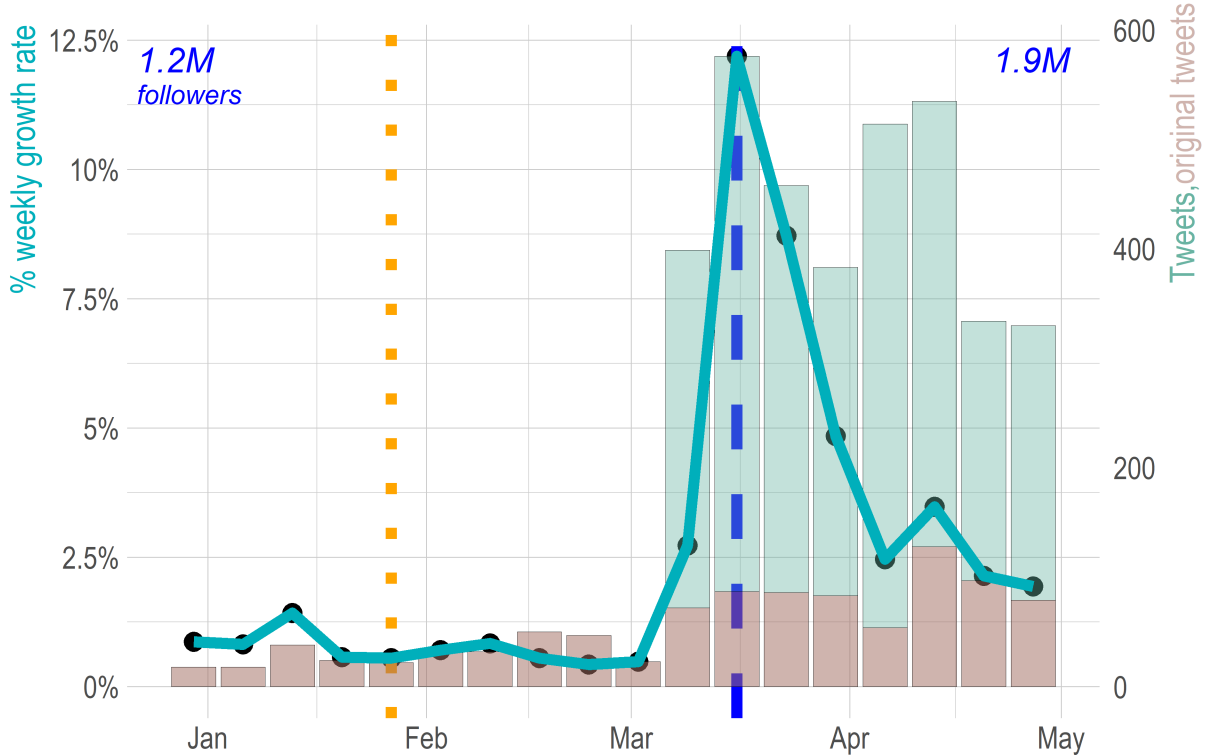

# President Nana Akufo-Addo (Ghana)

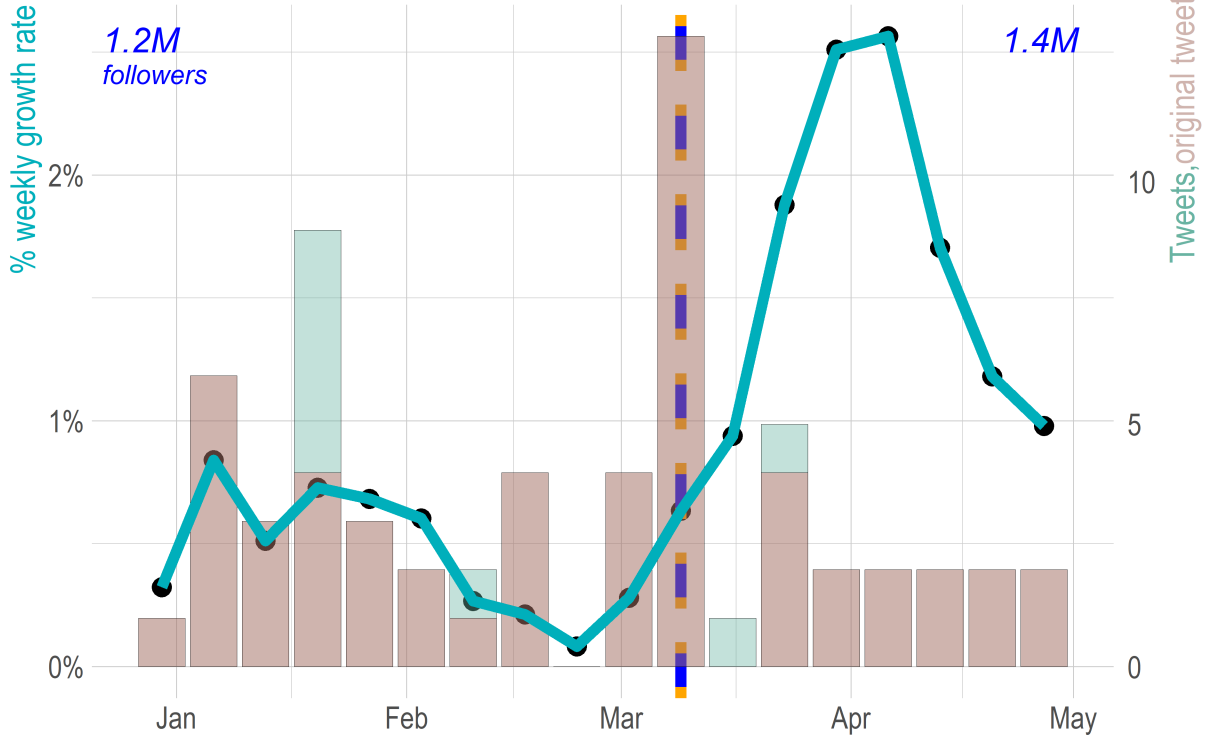



# Prime Minister Pedro Sánchez (Spain)

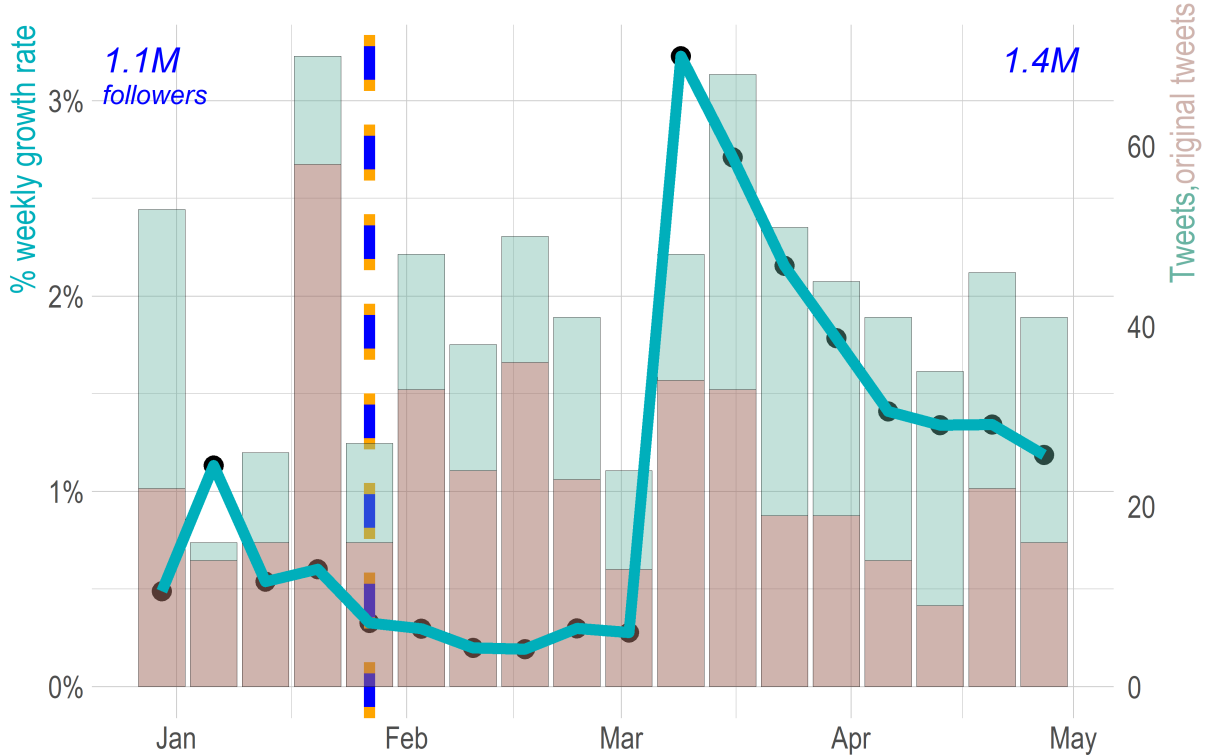

# President Iván Duque (Colombia)

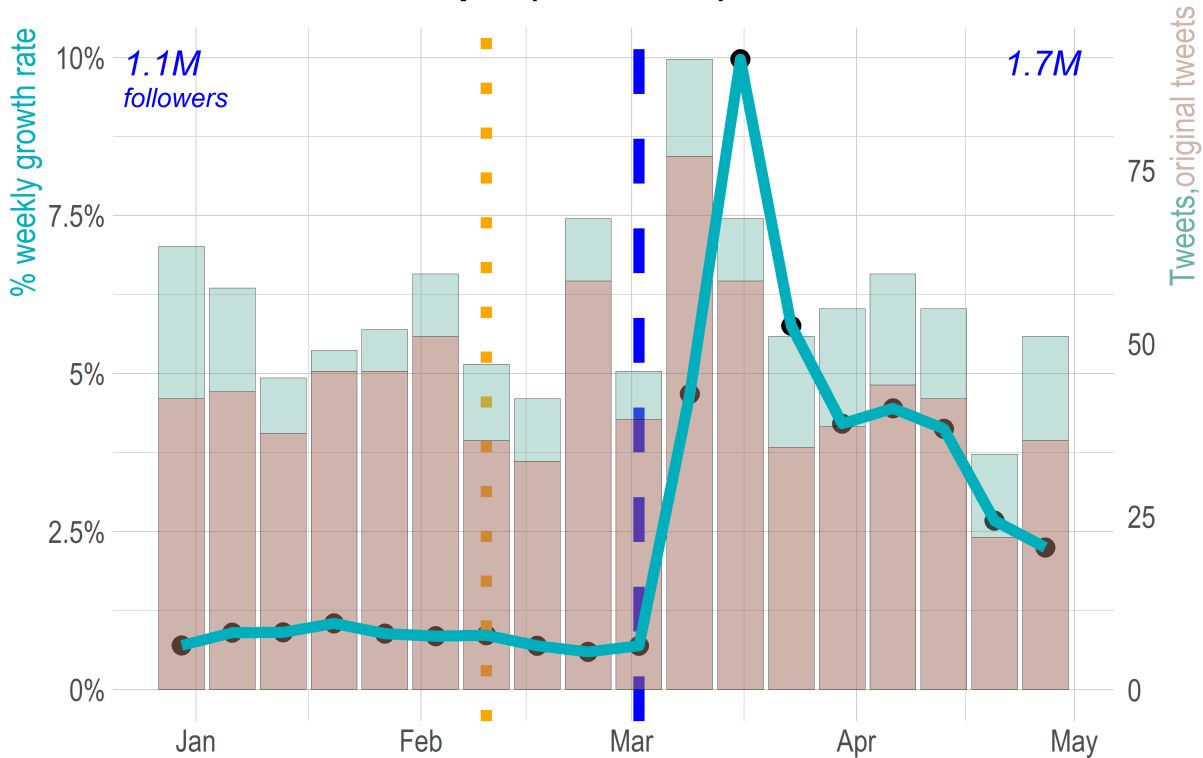

# President Andrzej Duda (Poland)

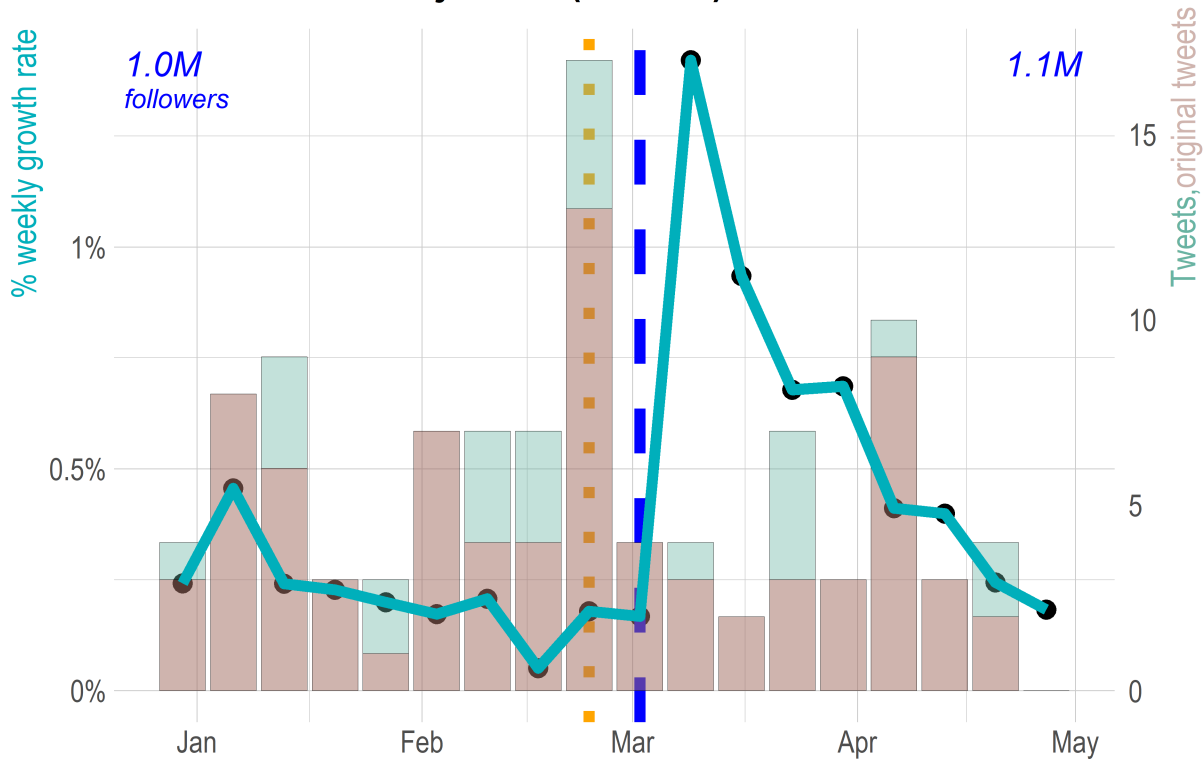

# President Macky Sall (Senegal)

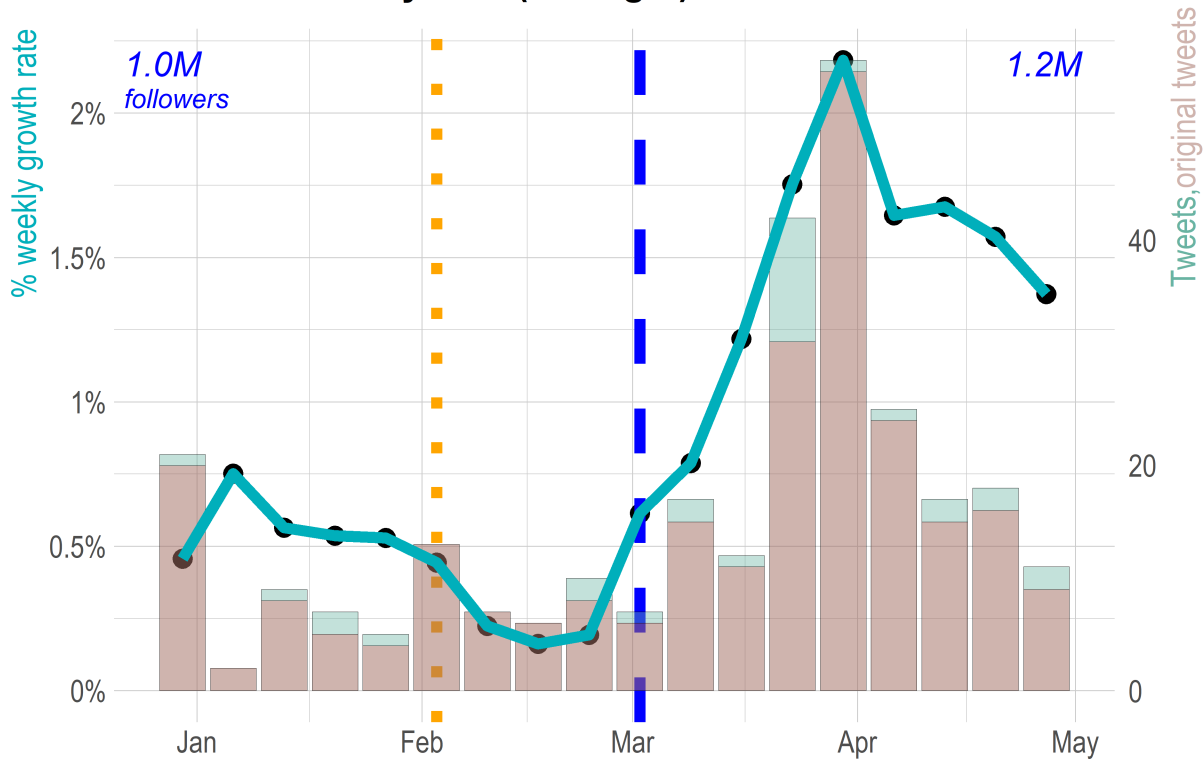

# Prime Minister Mark Rutte (Netherlands)

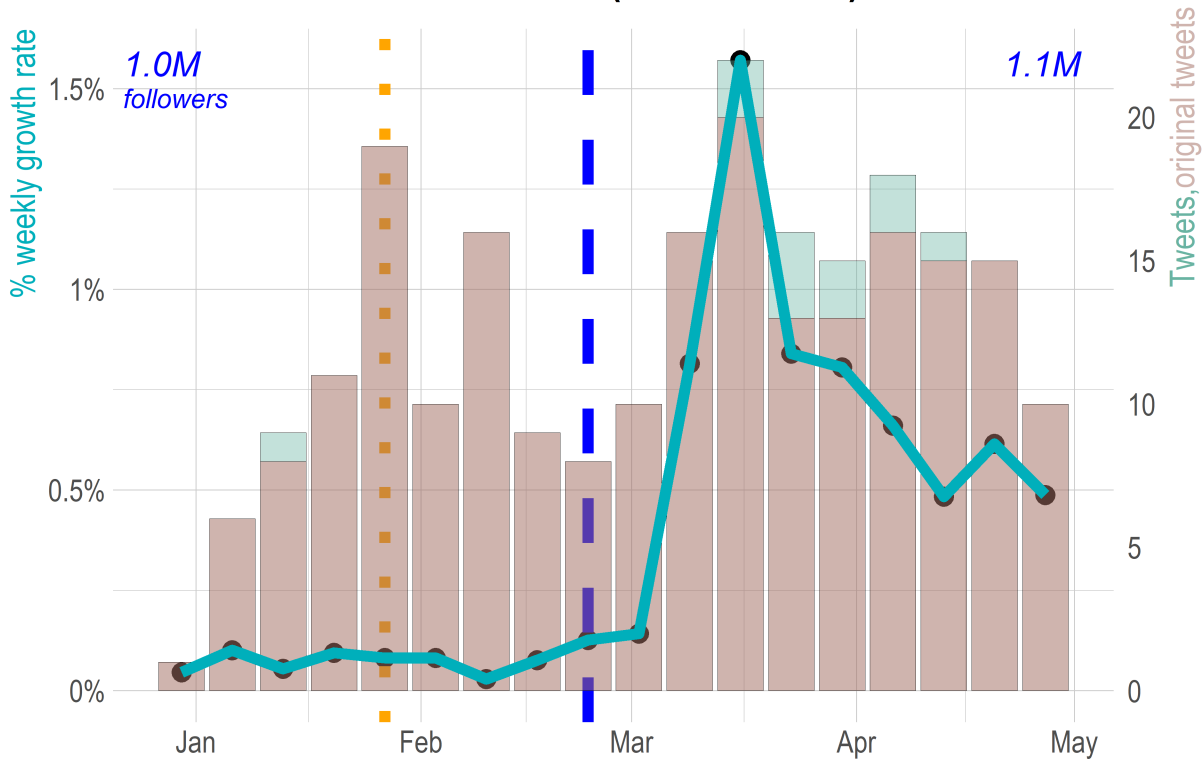

# President Hassan Rouhani (Iran)

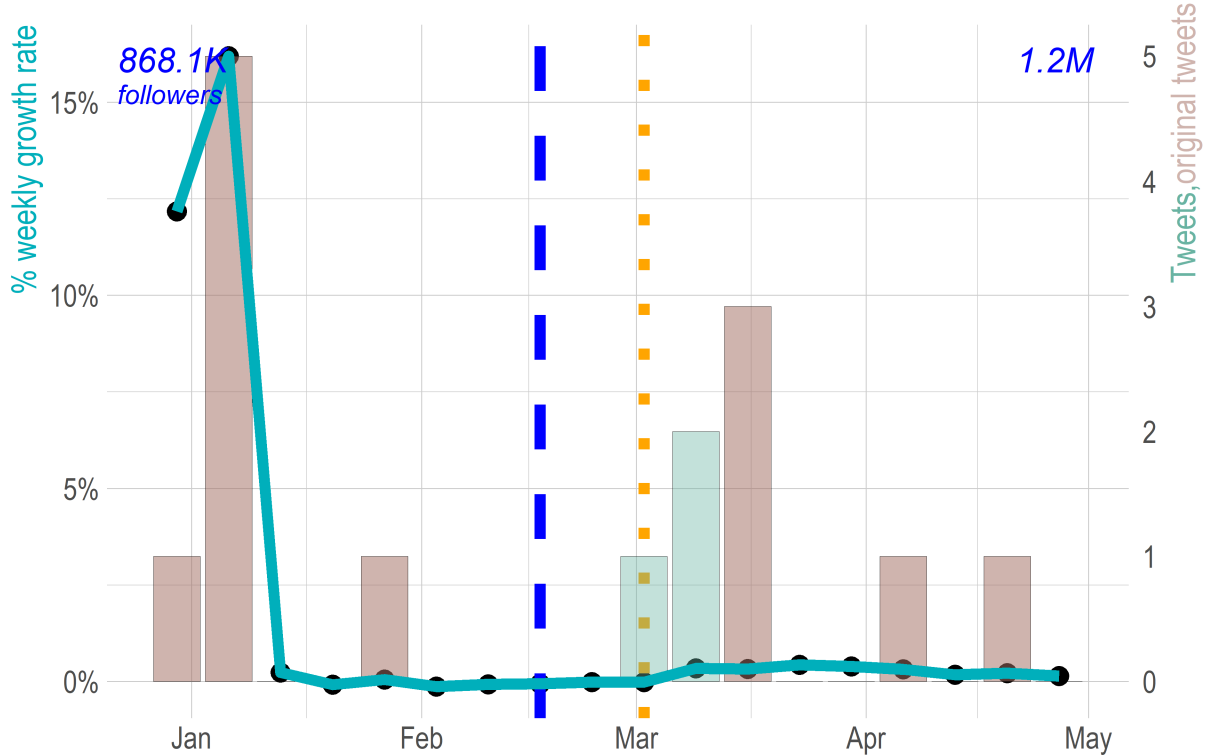

# President Lenín Moreno (Ecuador)

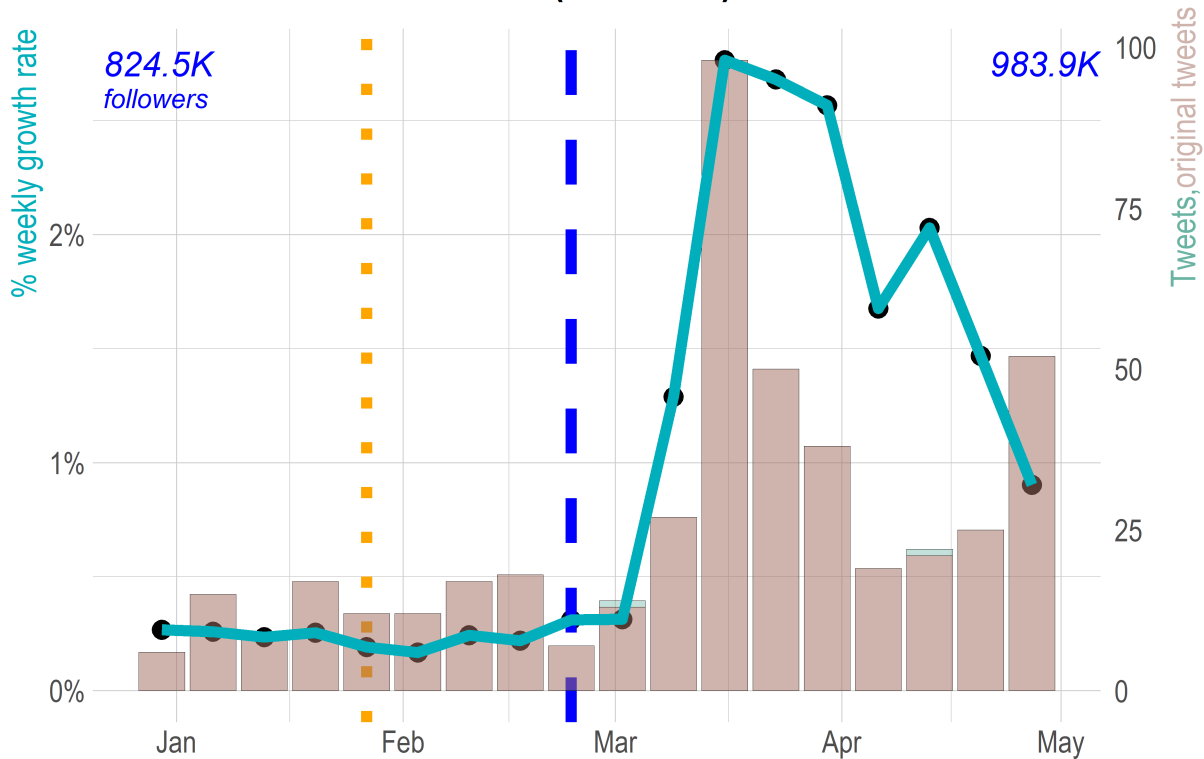

# President Cyril Ramaphosa (South Africa)

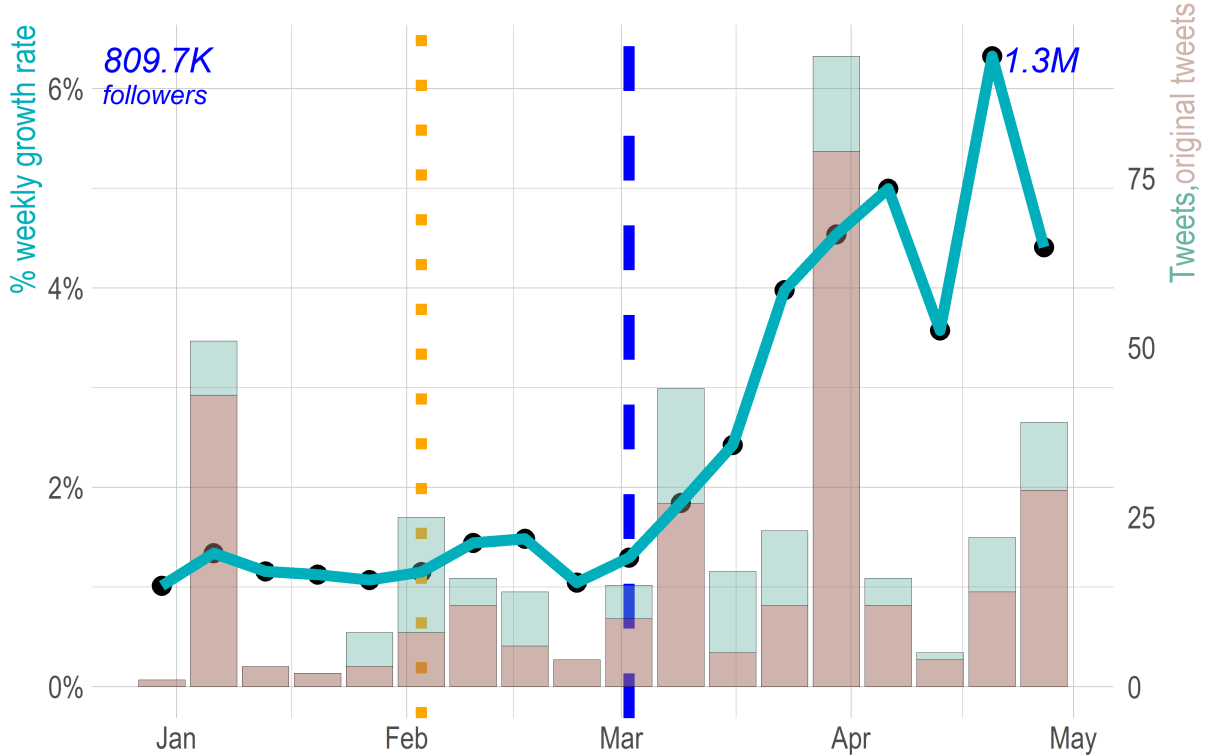



# President Alberto Fernández (Argentina)

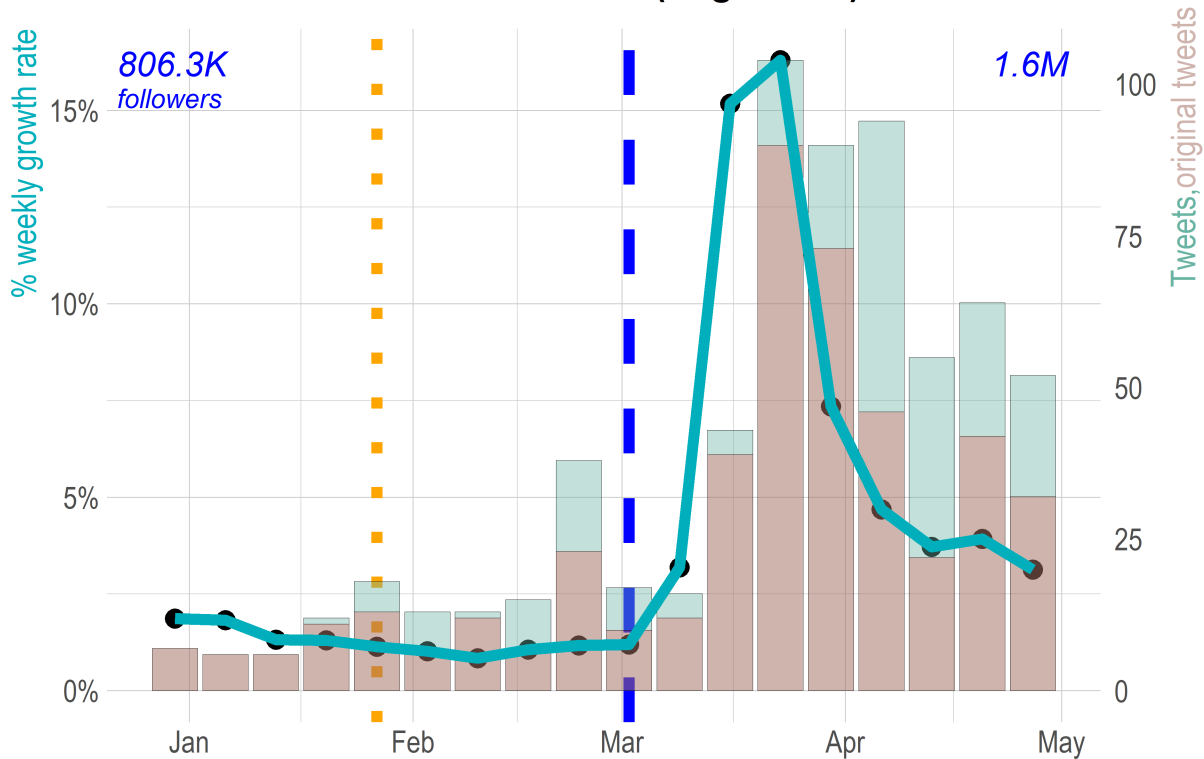

# President Barham Salih (Iraq)

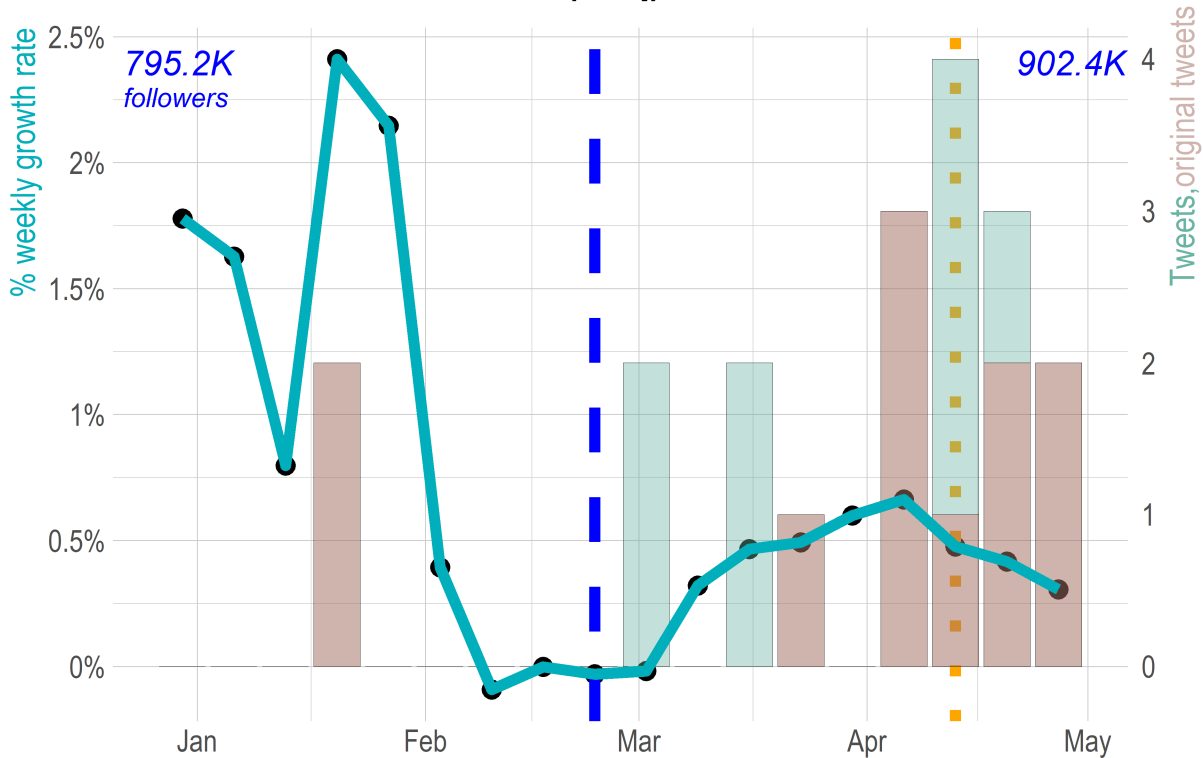

# Prime Minister Lee Hsien Loong (Singapore)

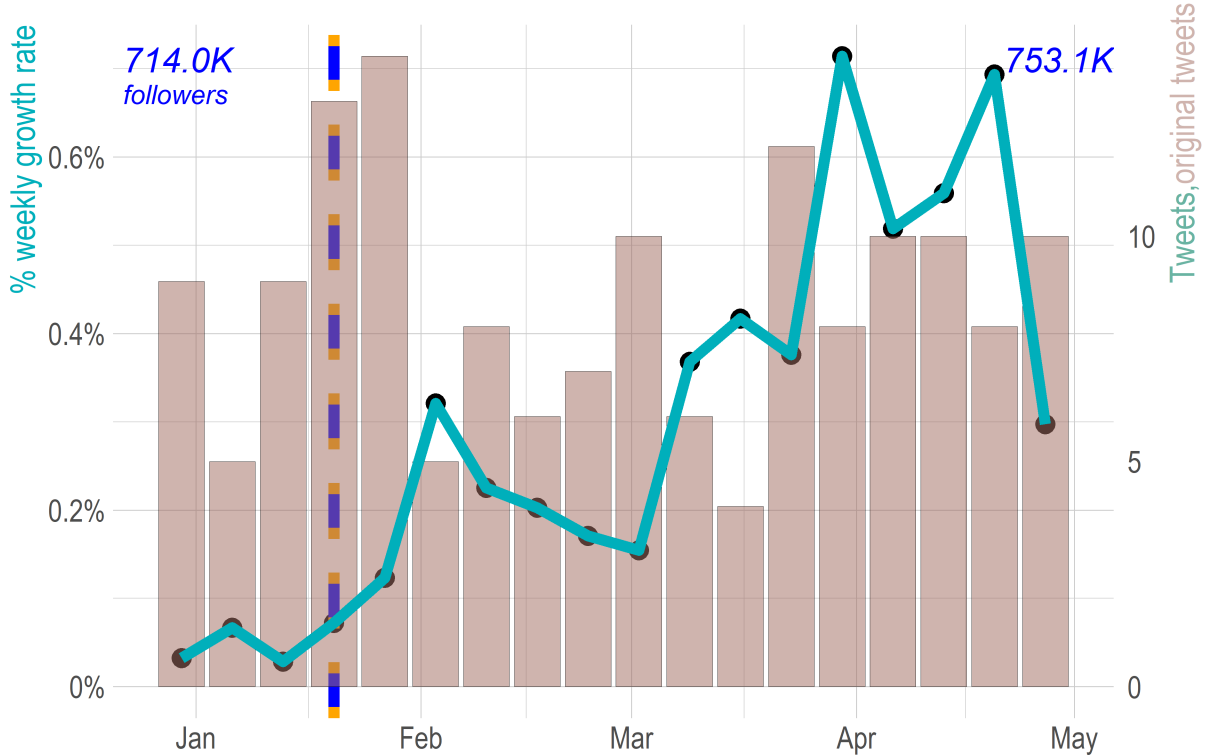

# President Danilo Medina (Dominican Republic)

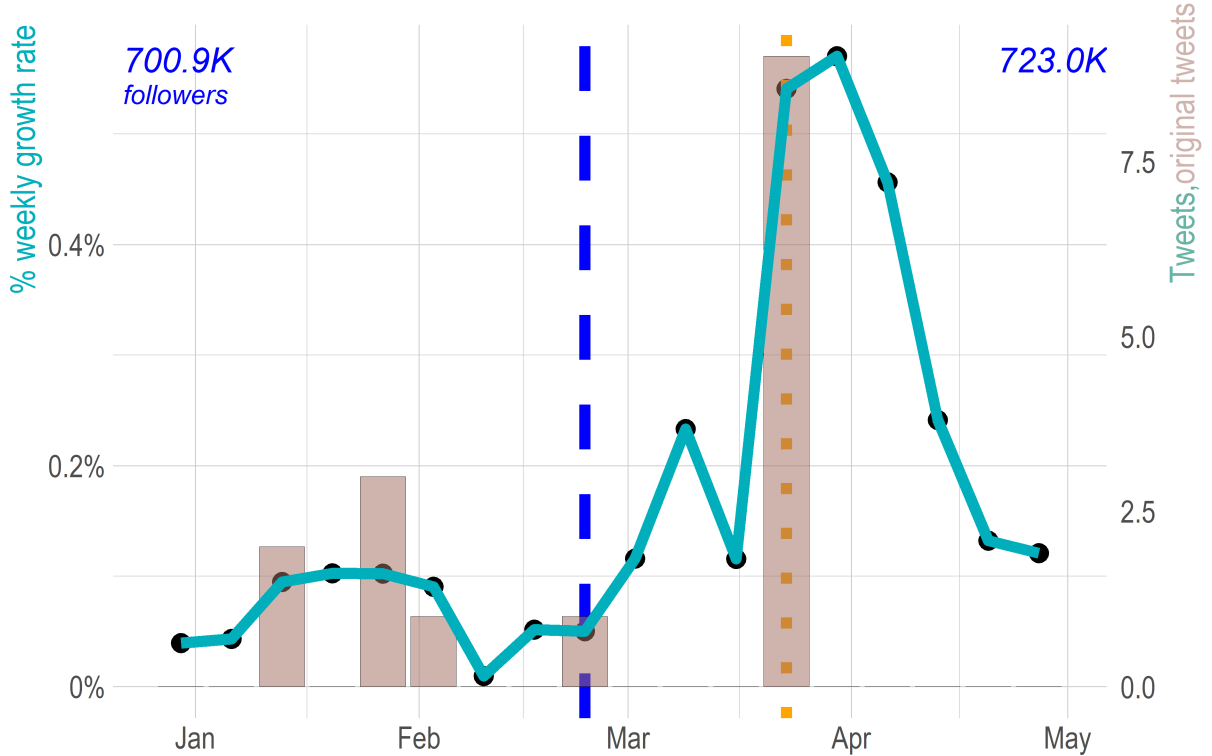

# President John Magufuli (Tanzania)

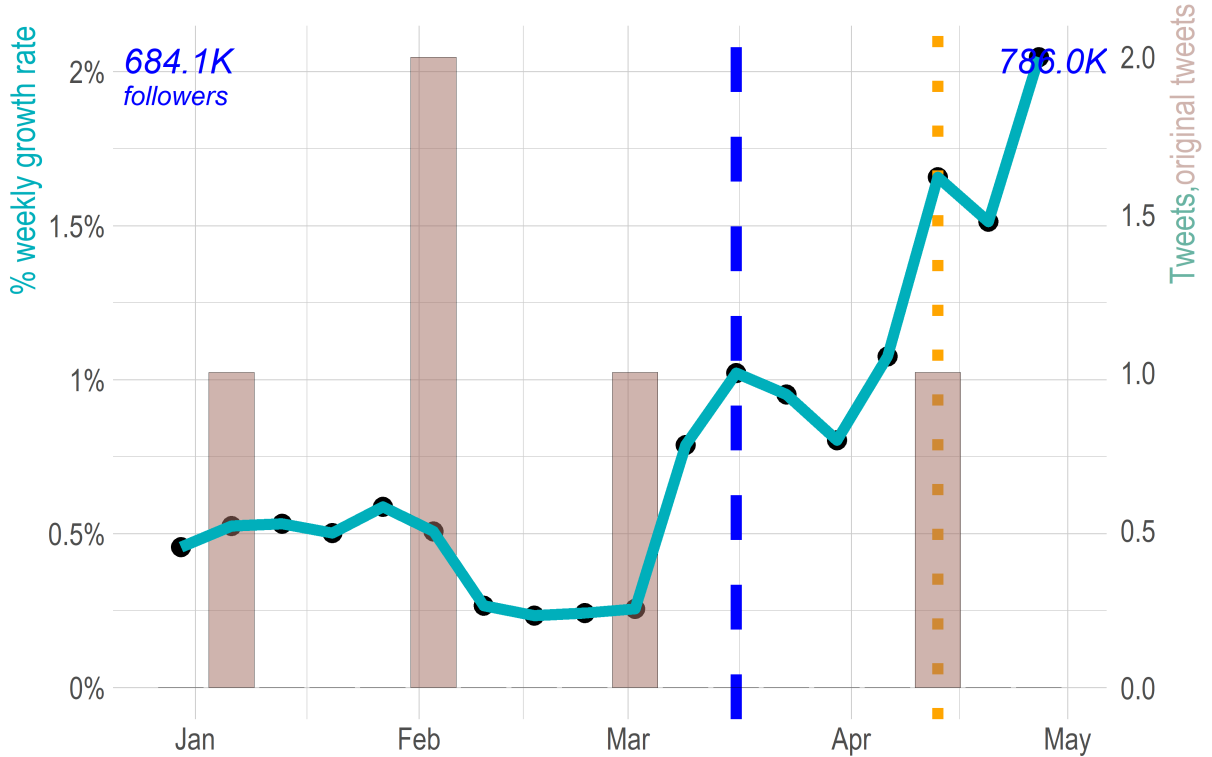

# President Martín Vizcarra (Peru)

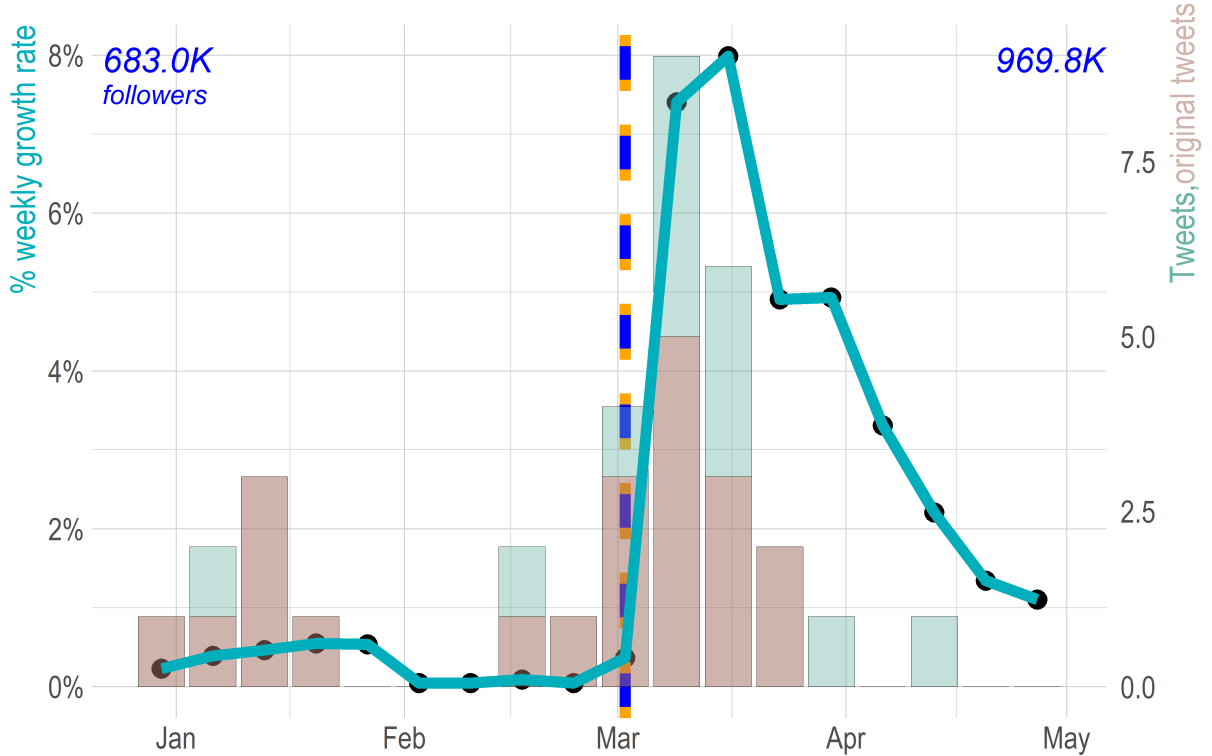

# Emir Tamim bin Hamad Al Thani (Qatar)

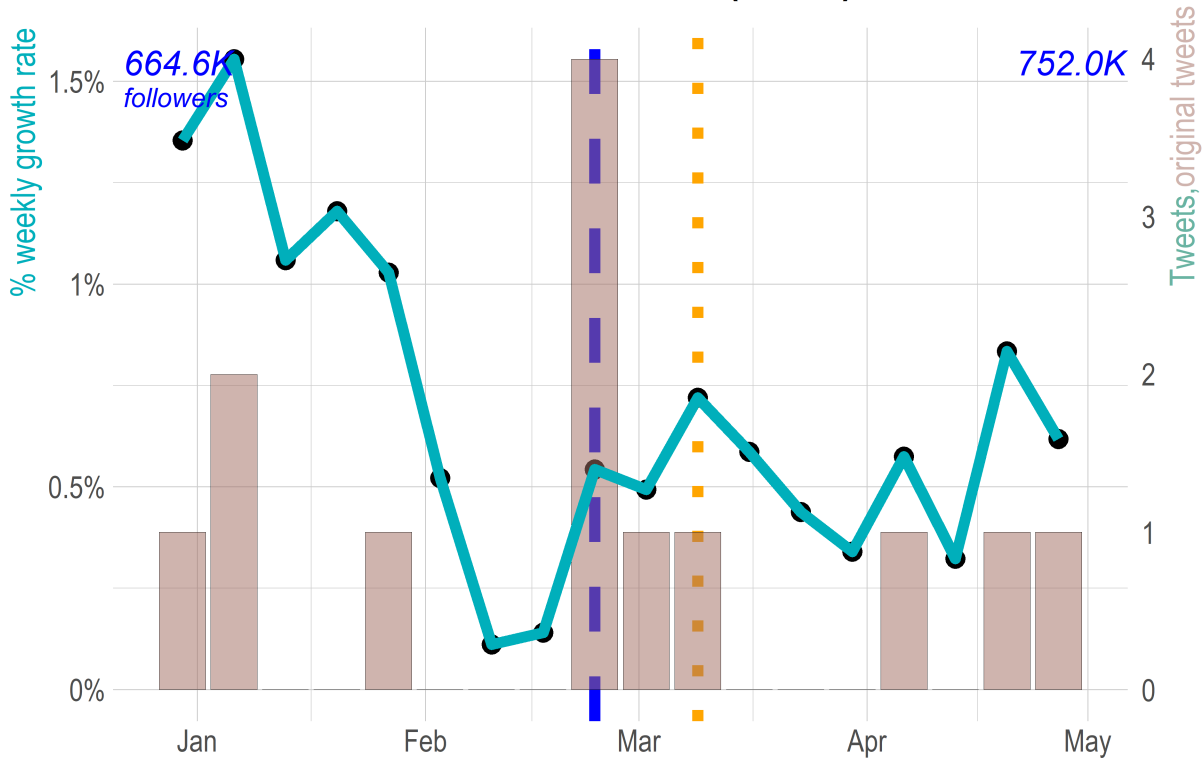

# President Tsai Ing-wen (Taiwan)

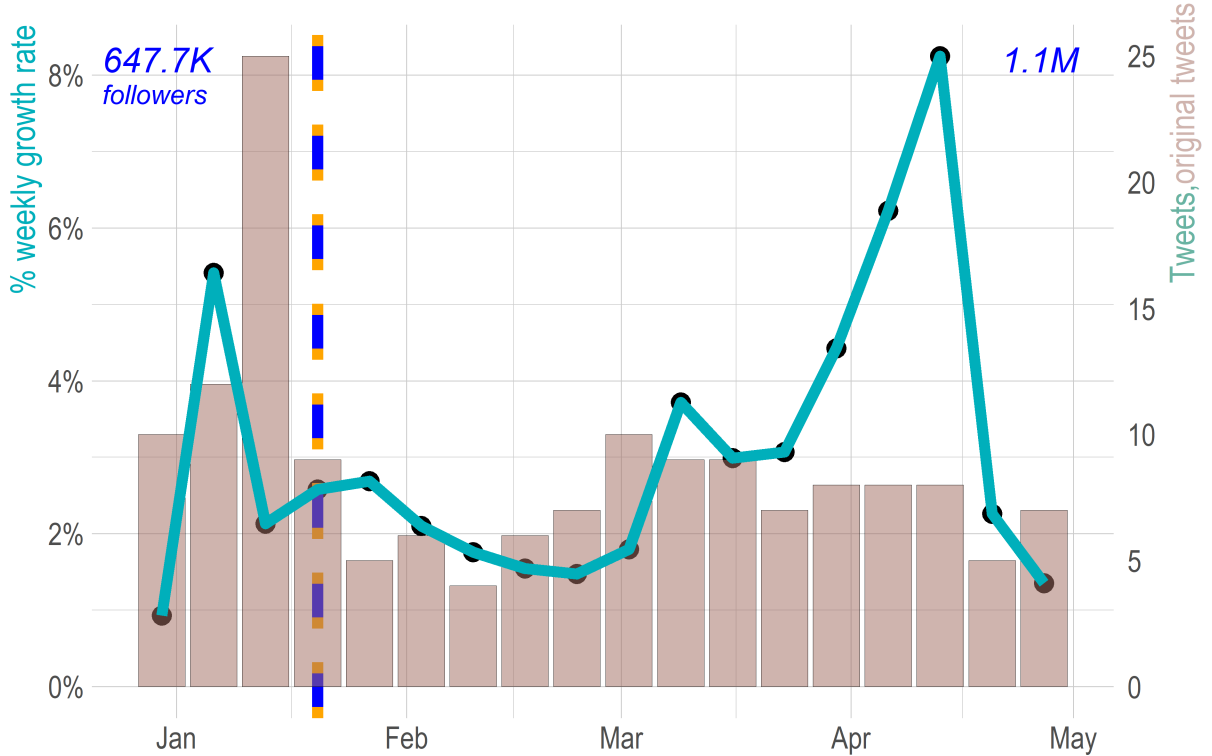



# President Ashraf Ghani (Afghanistan)

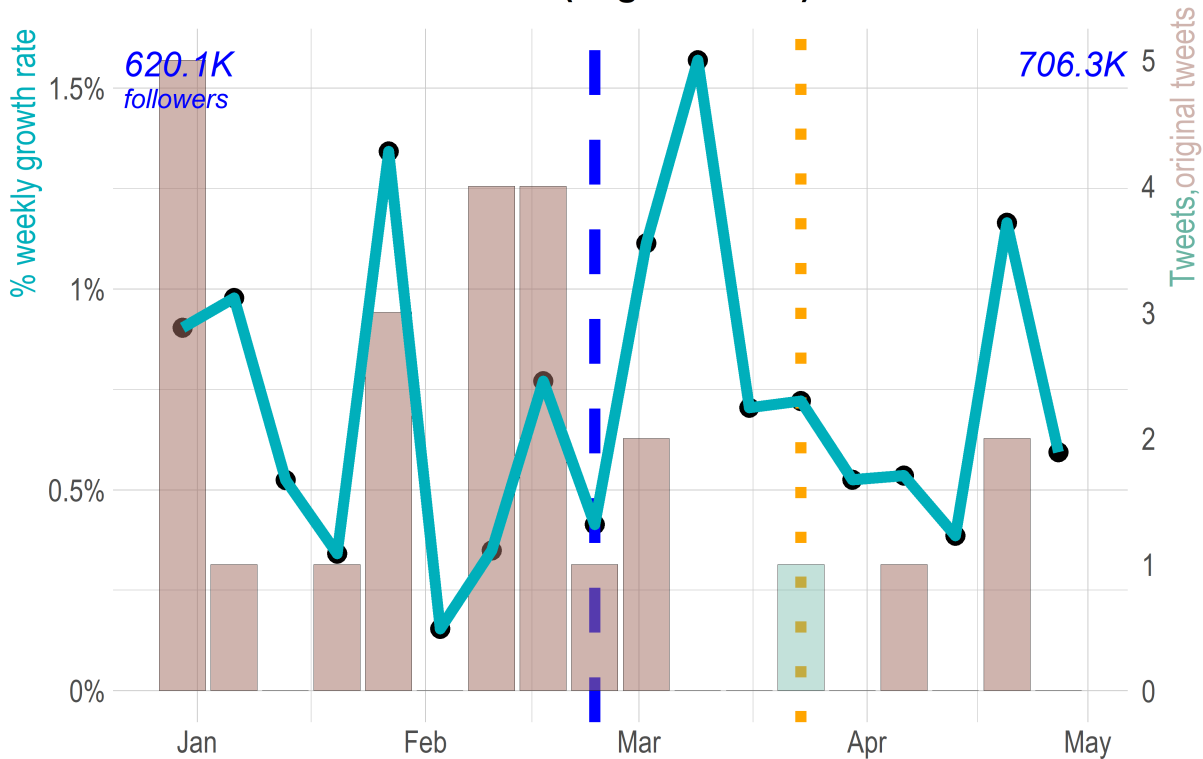

# President Alassane Dramane Ouattara (Ivory Coast)

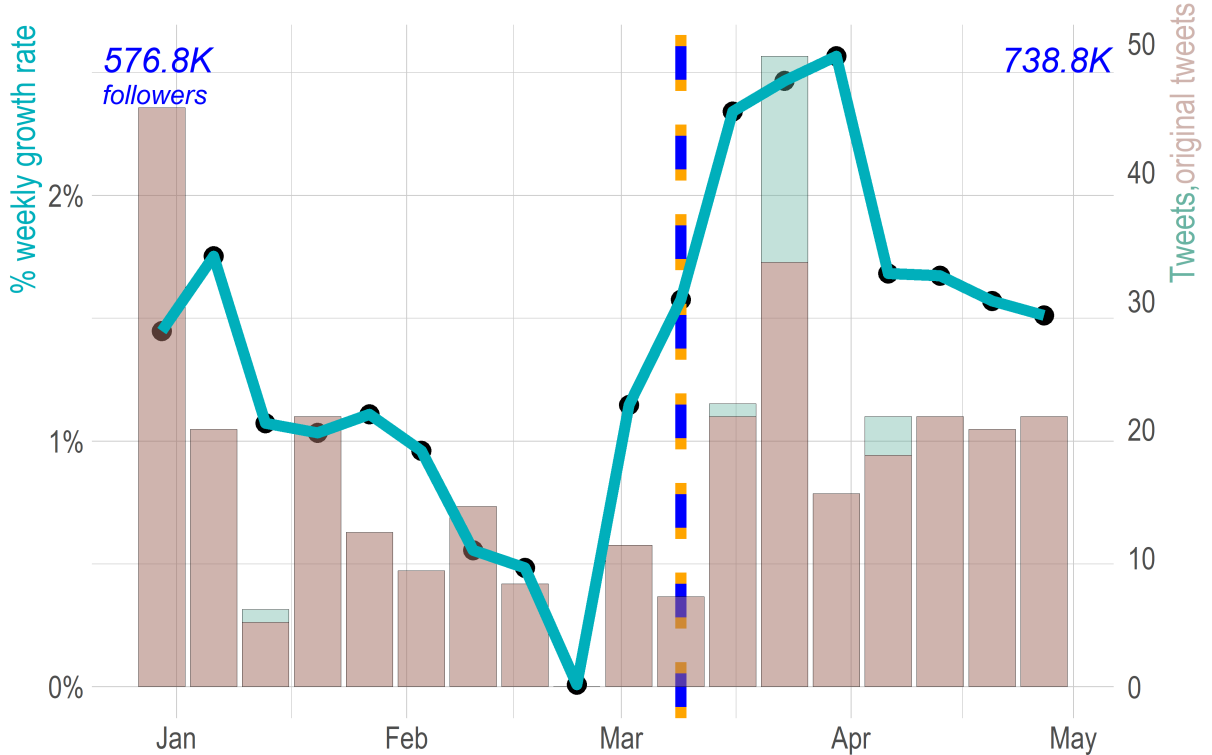

# President Paul Biya (Cameroon)

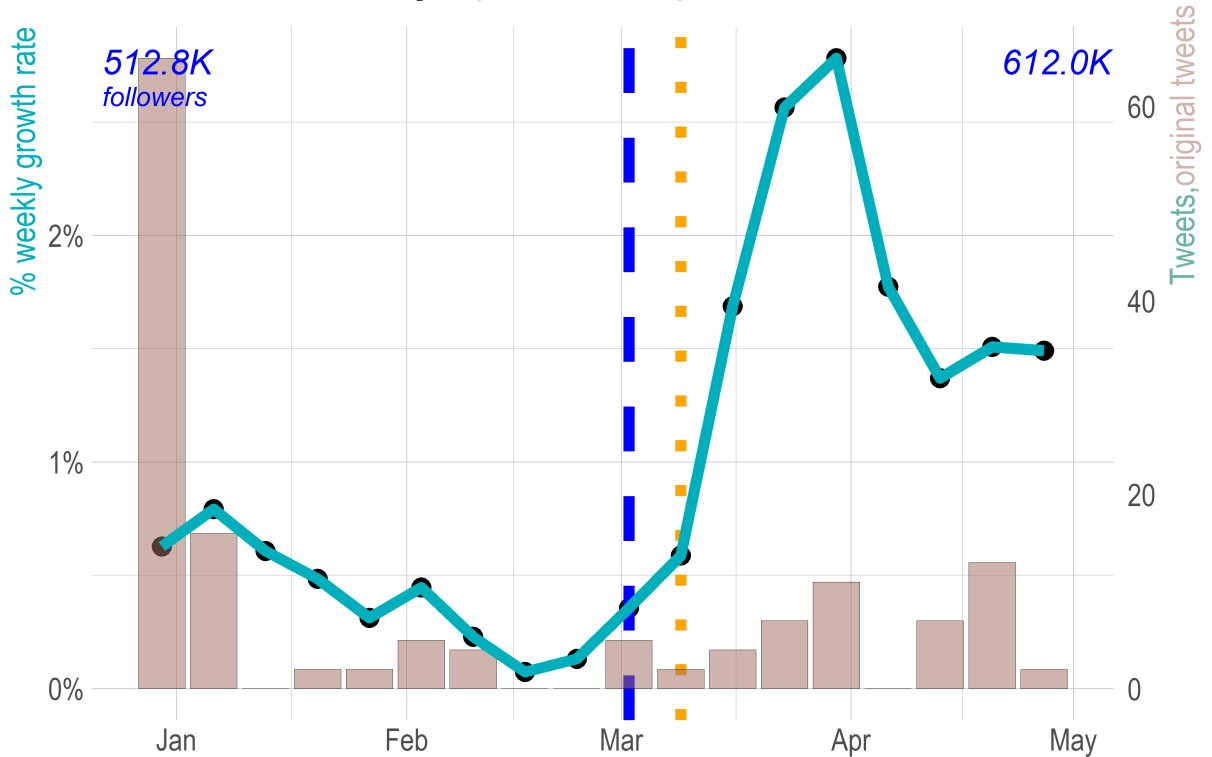

# Prime Minister Kyriakos Mitsotakis (Greece)

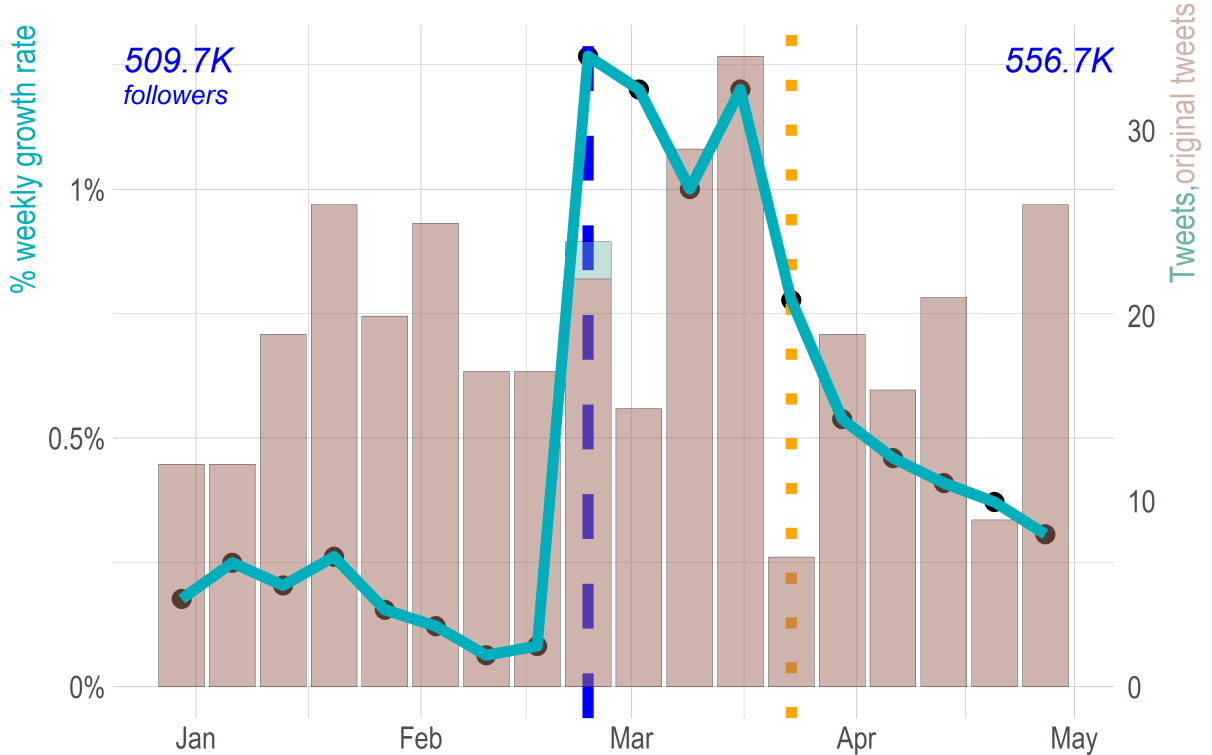

# President Emmerson Dambudzo Mnangagwa (Zimbabwe)

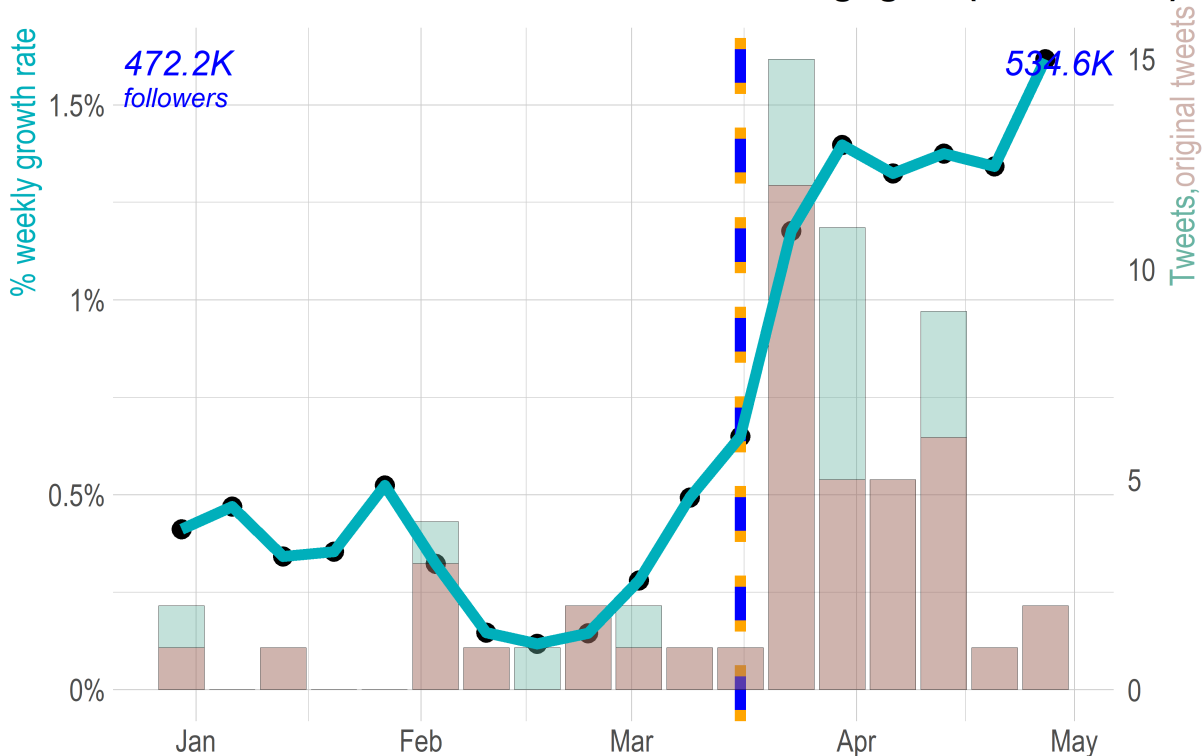

# Prime Minister Khadga Prasad Sharma Oli (Nepal)

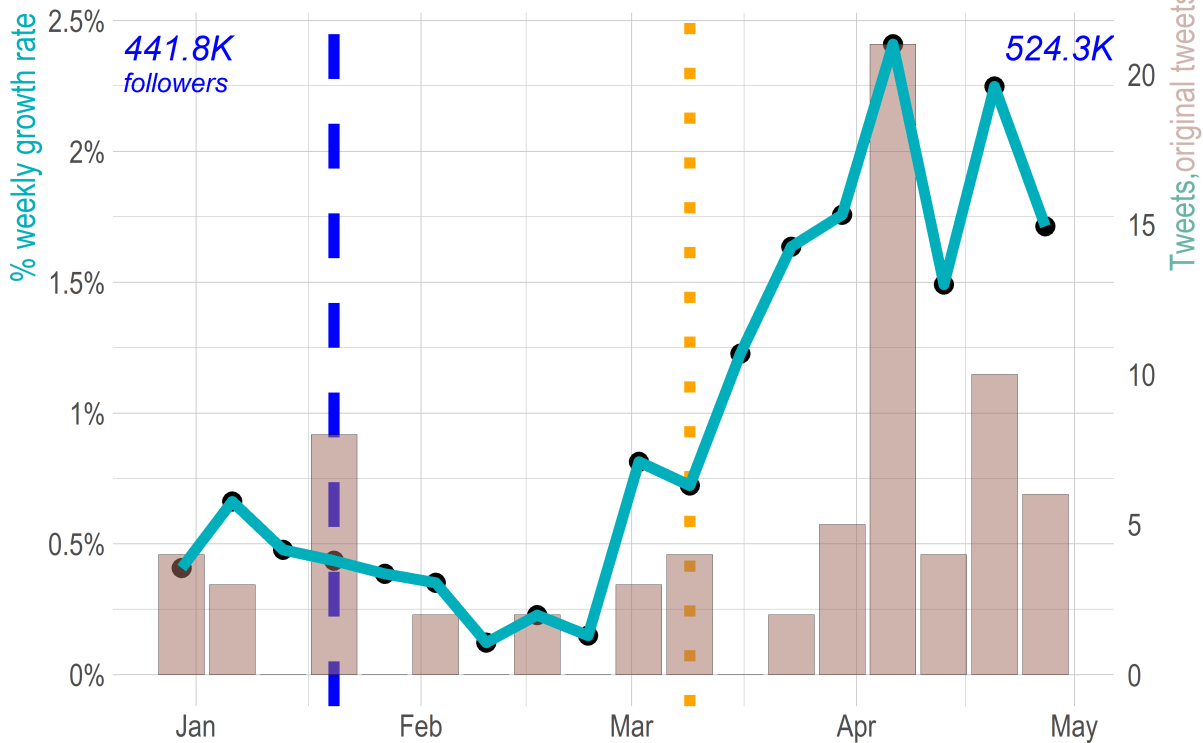

# President Juan Orlando Hernández (Honduras)

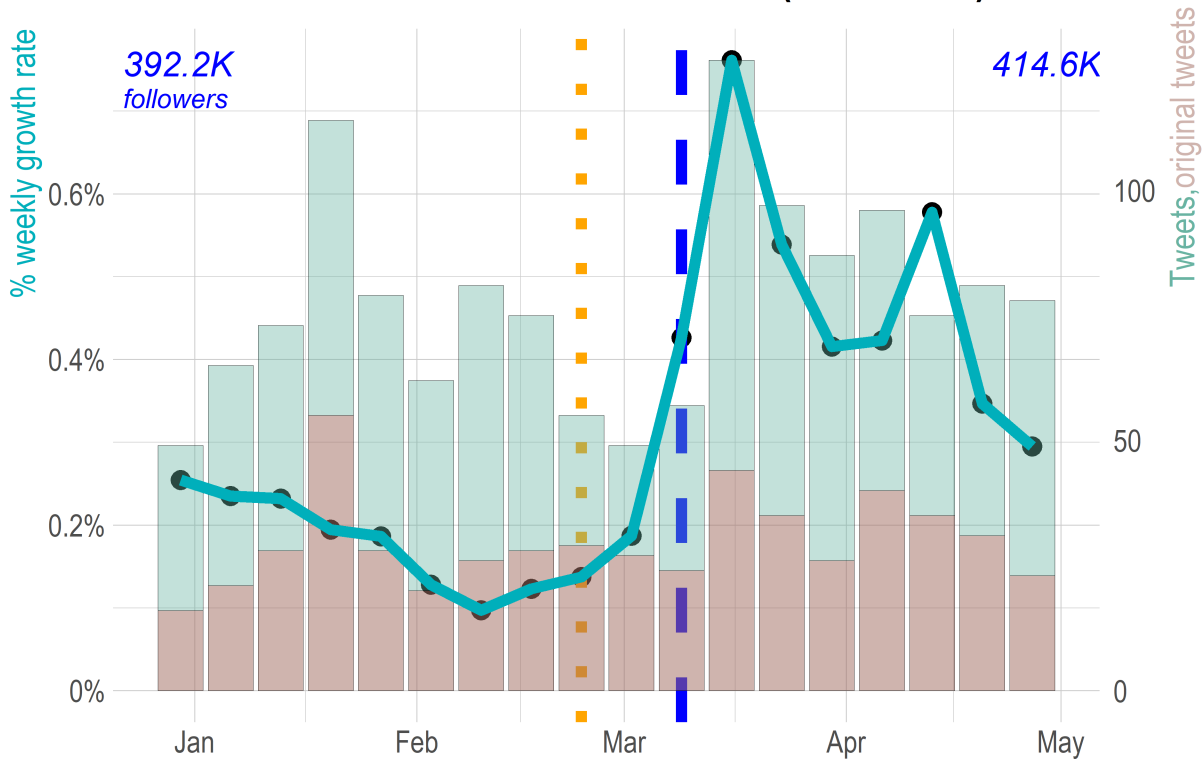

# Prime Minister Mahinda Rajapaksa (Sri Lanka)

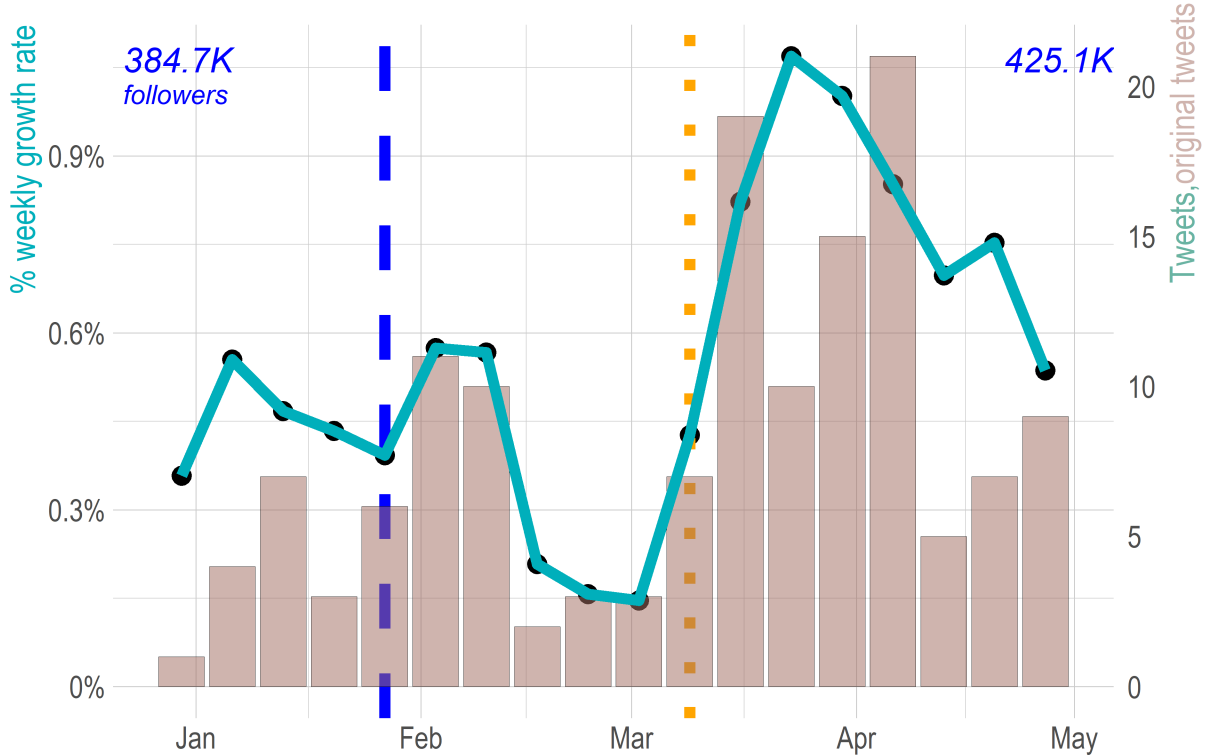



# Prime Minister Andrej Babiš (Czech Republic)

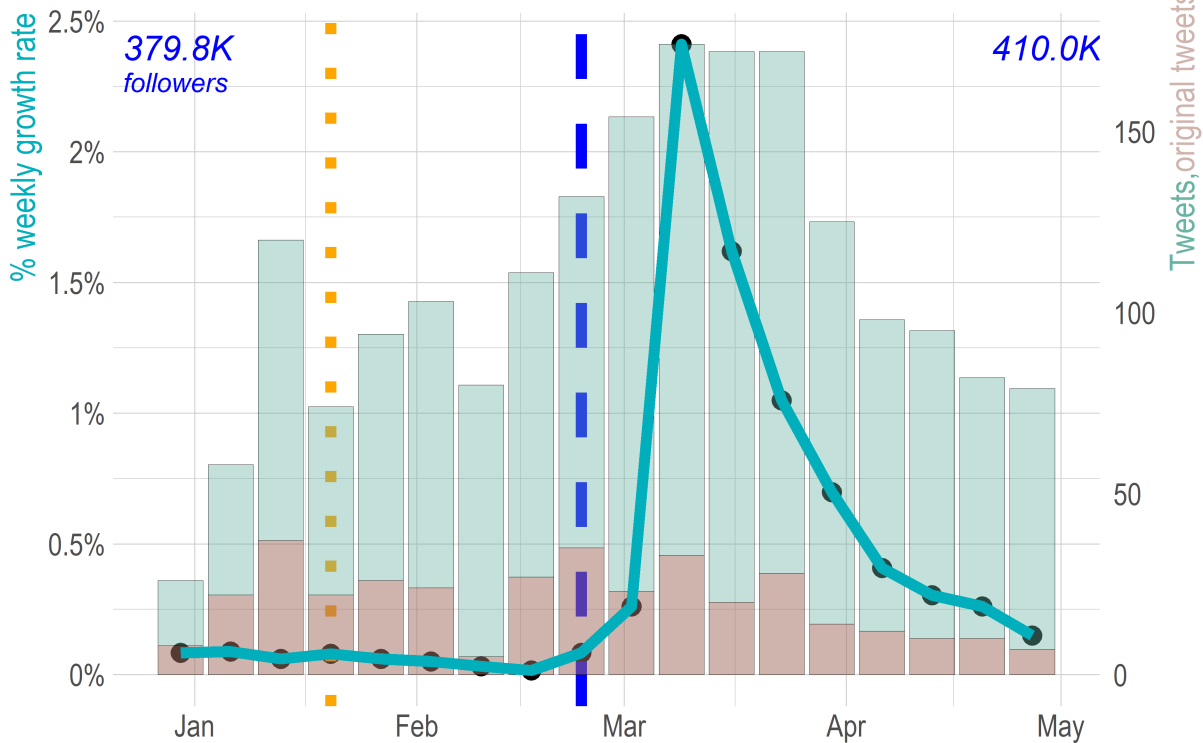

# President Mario Abdo Benítez (Paraguay)

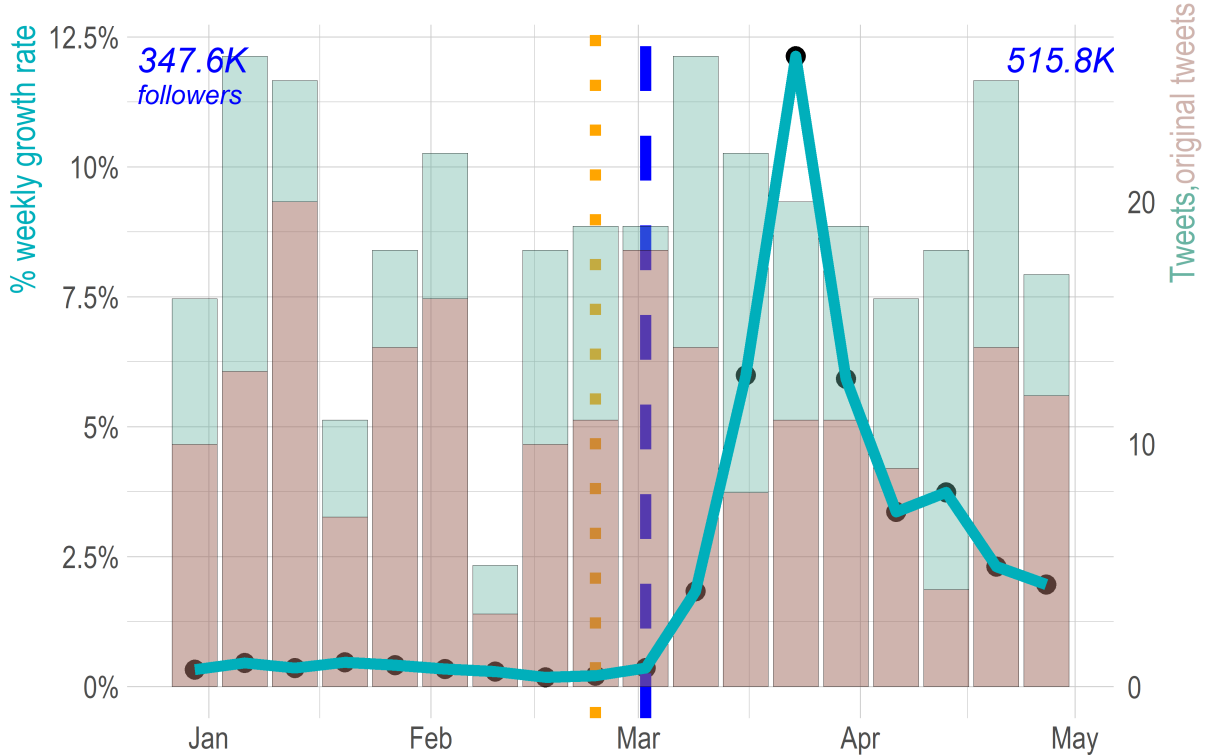

# Prime Minister Hassan Ali Khaire (Somalia)

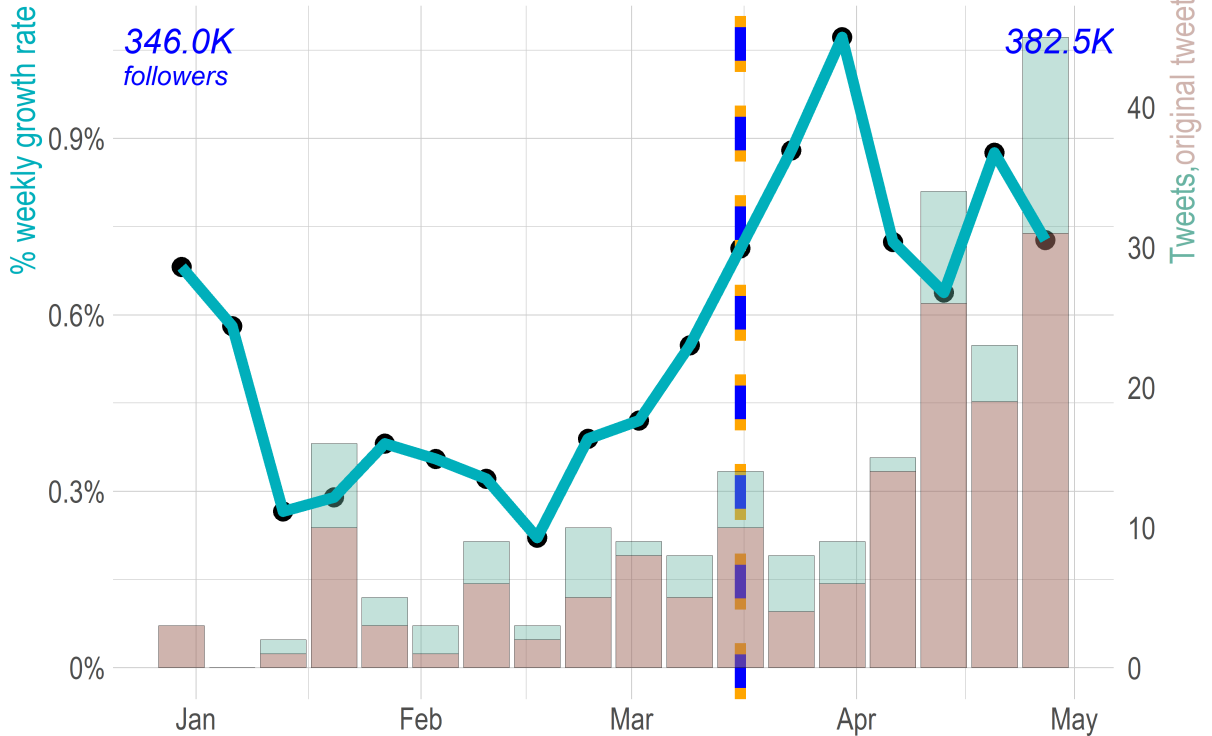

# Prime Minister Edi Rama (Albania)

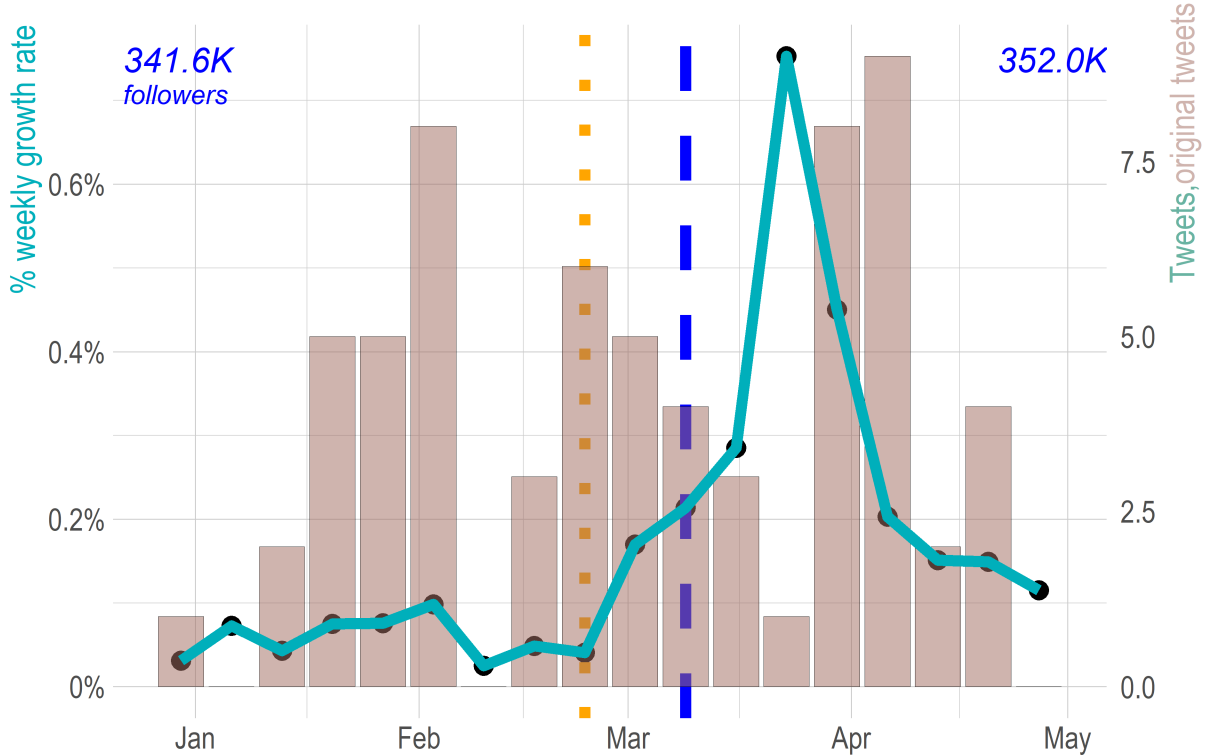

# President Aleksandar Vučić (Serbia)

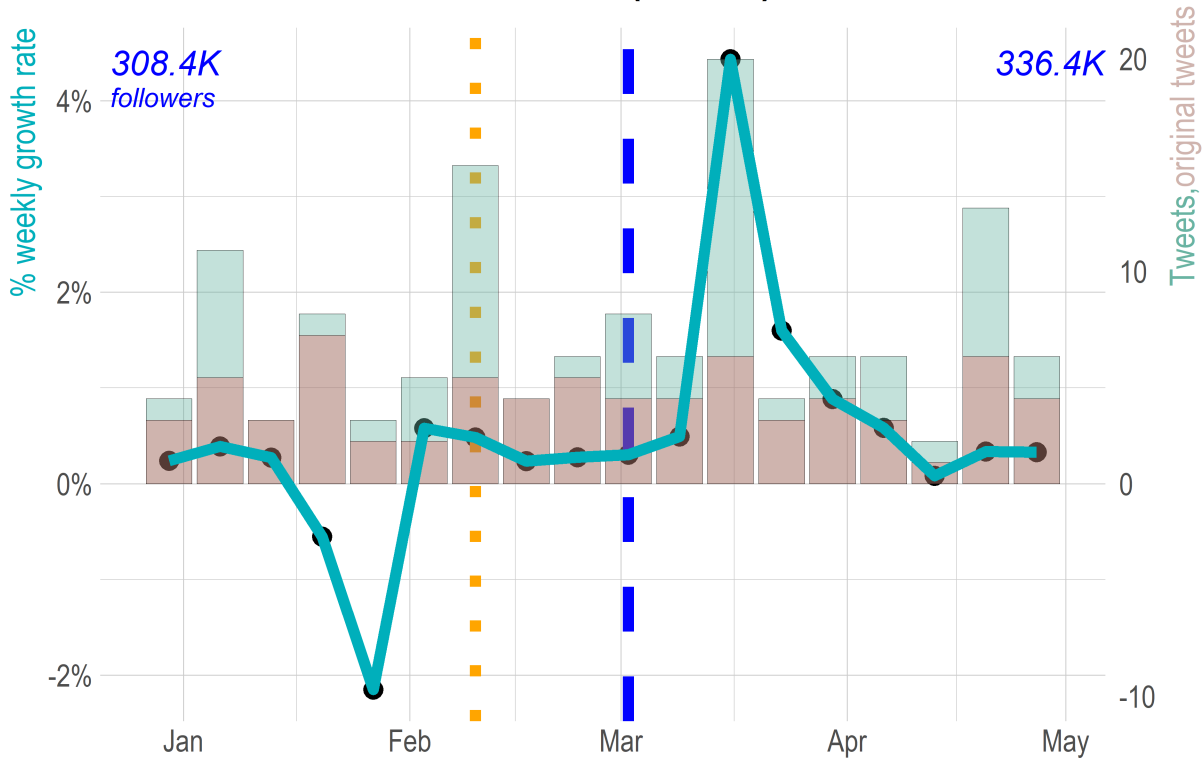

# Prime Minister Giuseppe Conte (Italy)

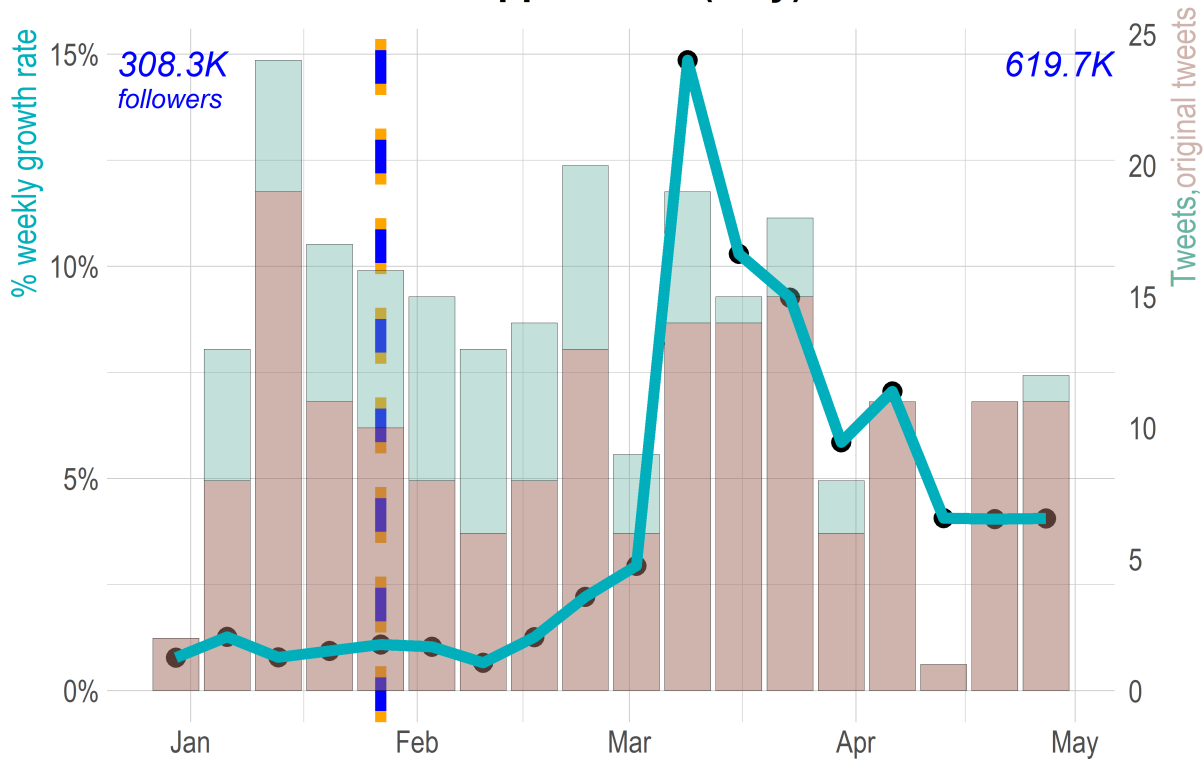

Supplement: mmc1.pdf [file mmc1.pdf]
