# Supplementary material for: The use of Twitter by state leaders and its impact on the public during the COVID-19 pandemic
Source: PubMed Central journal article supplement (PMC7695954; doi:10.1016/j.heliyon.2020.e05540), 2020-11-19

# President Michel Aoun (Lebanon)

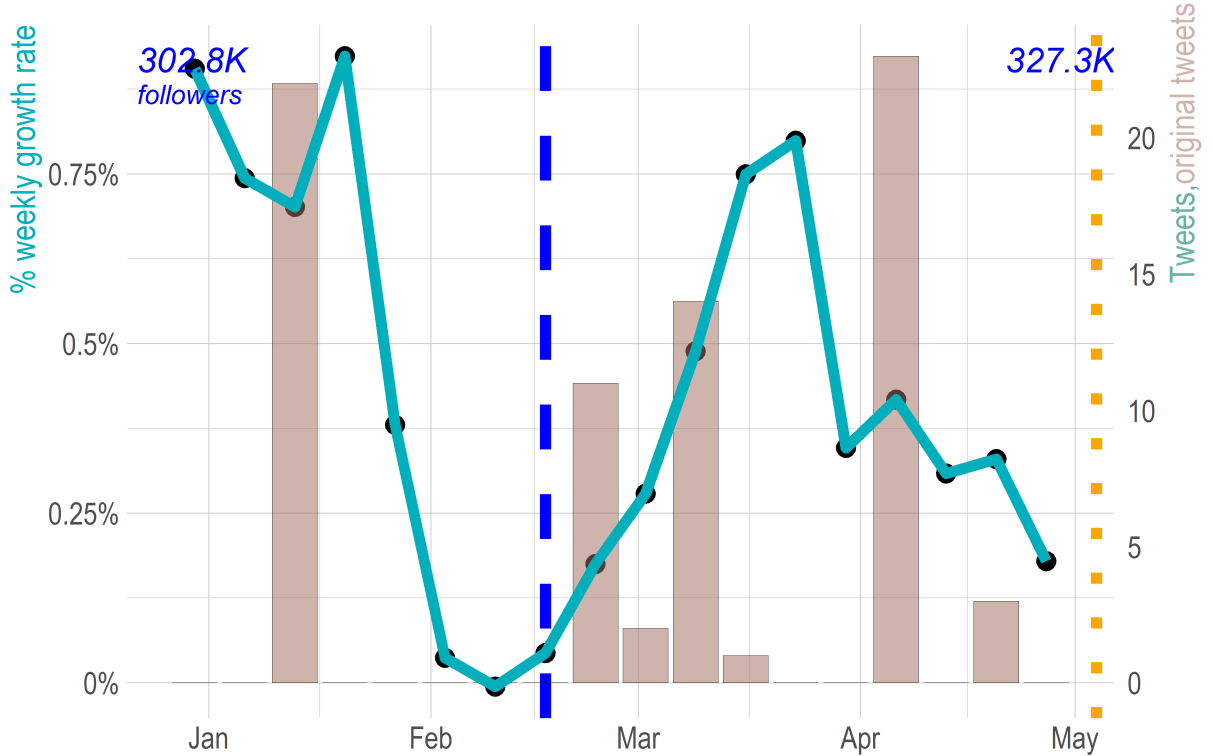

# President Khaltmaagiin Battulga (Mongolia)

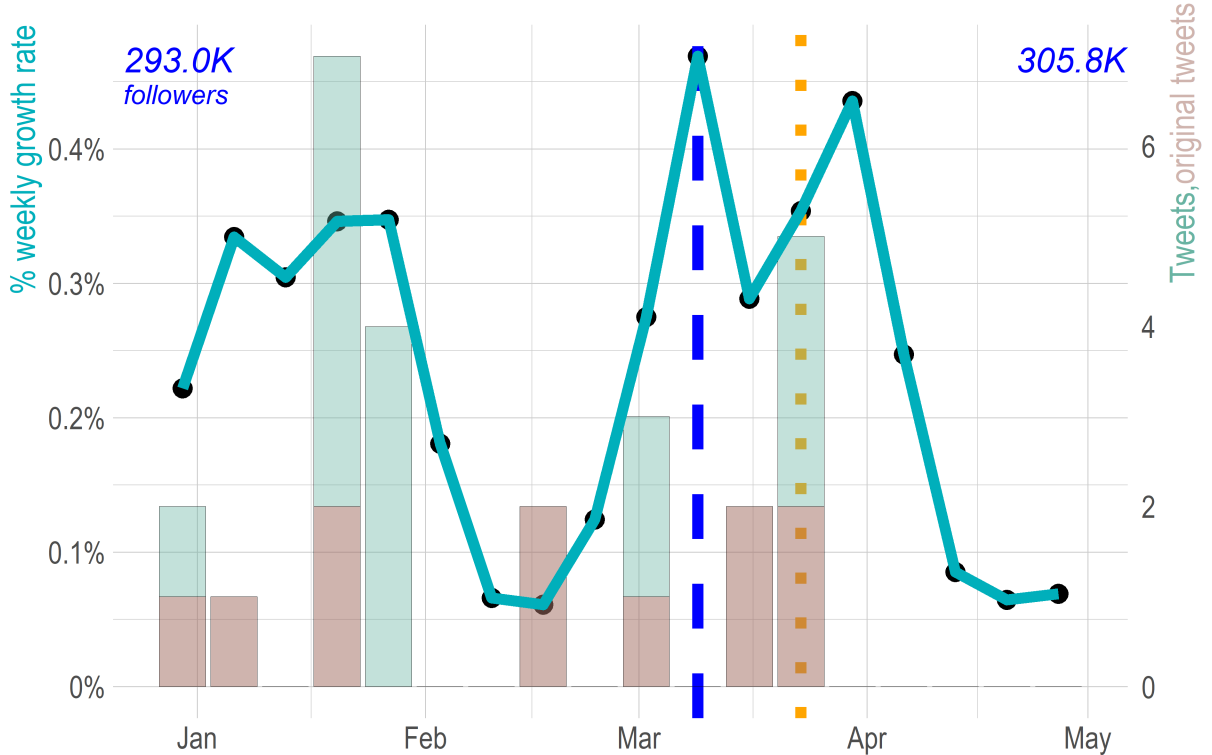

# Prime Minister Erna Solberg (Norway)

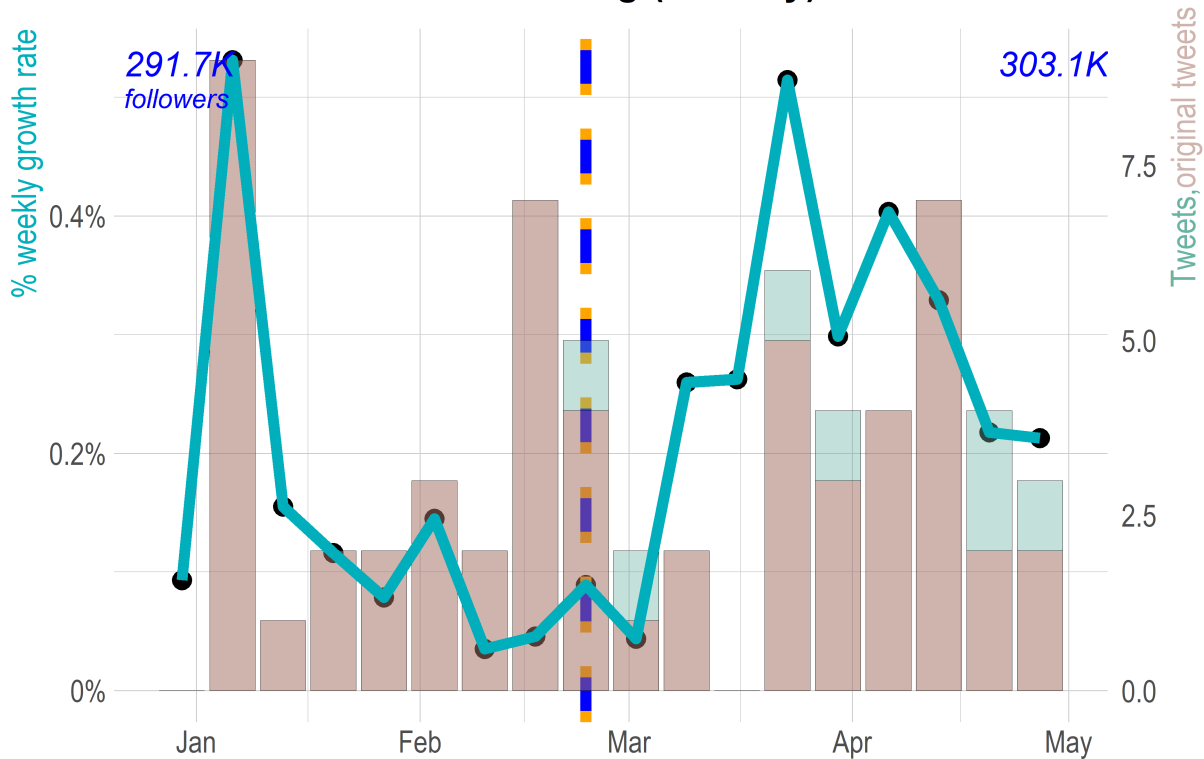

# President Jovenel Moïse (Haiti)

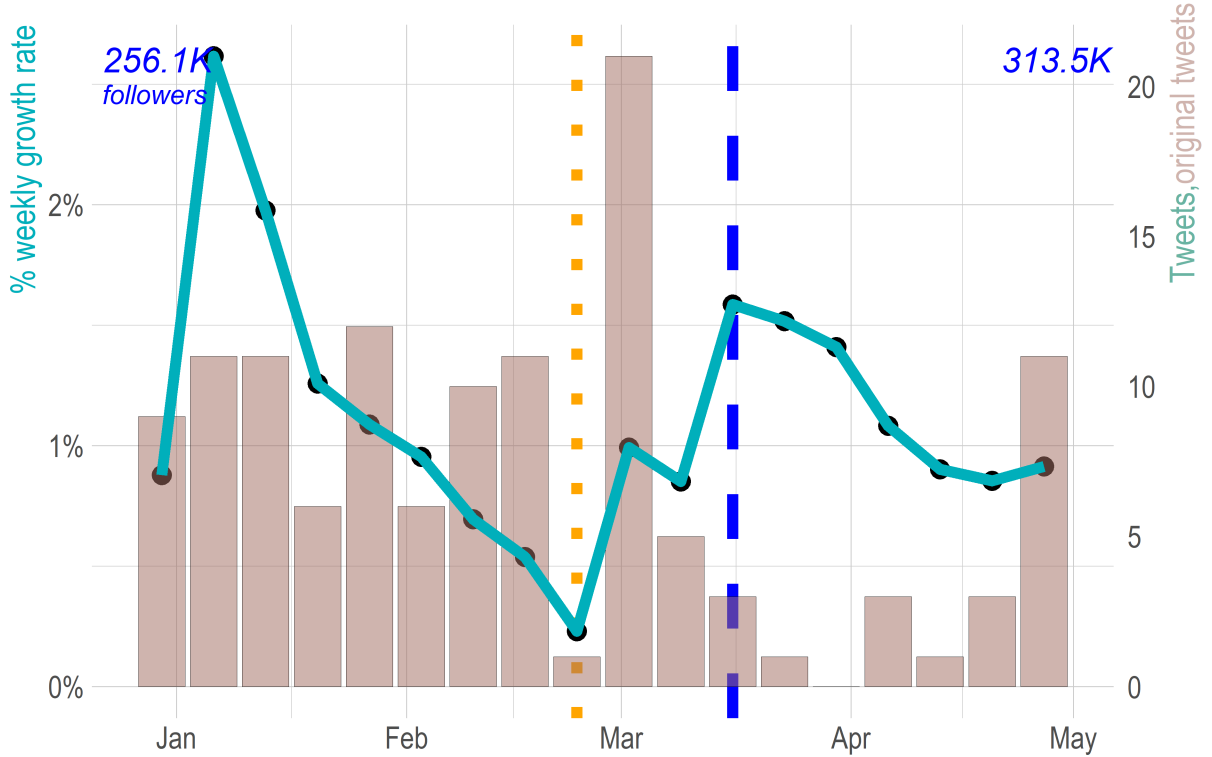



# Prime Minister Leo Varadkar (Ireland)

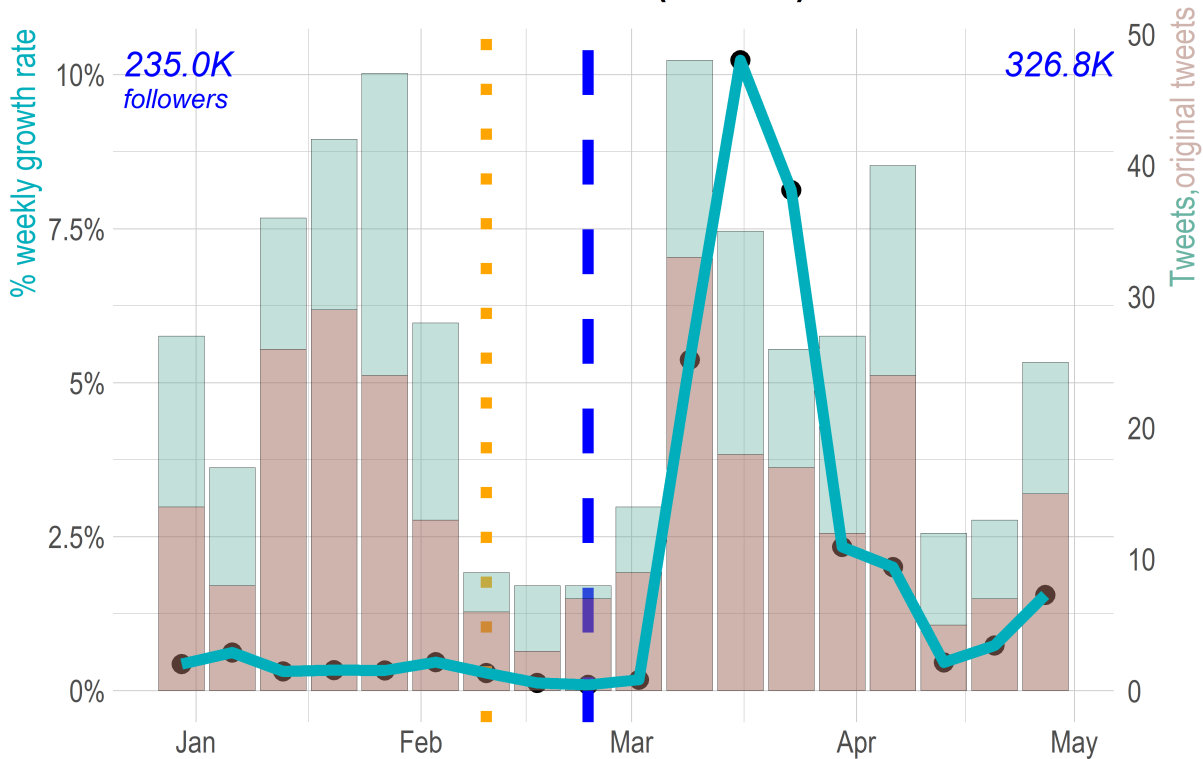

# President Jeanine Añez Chavez (Bolivia)

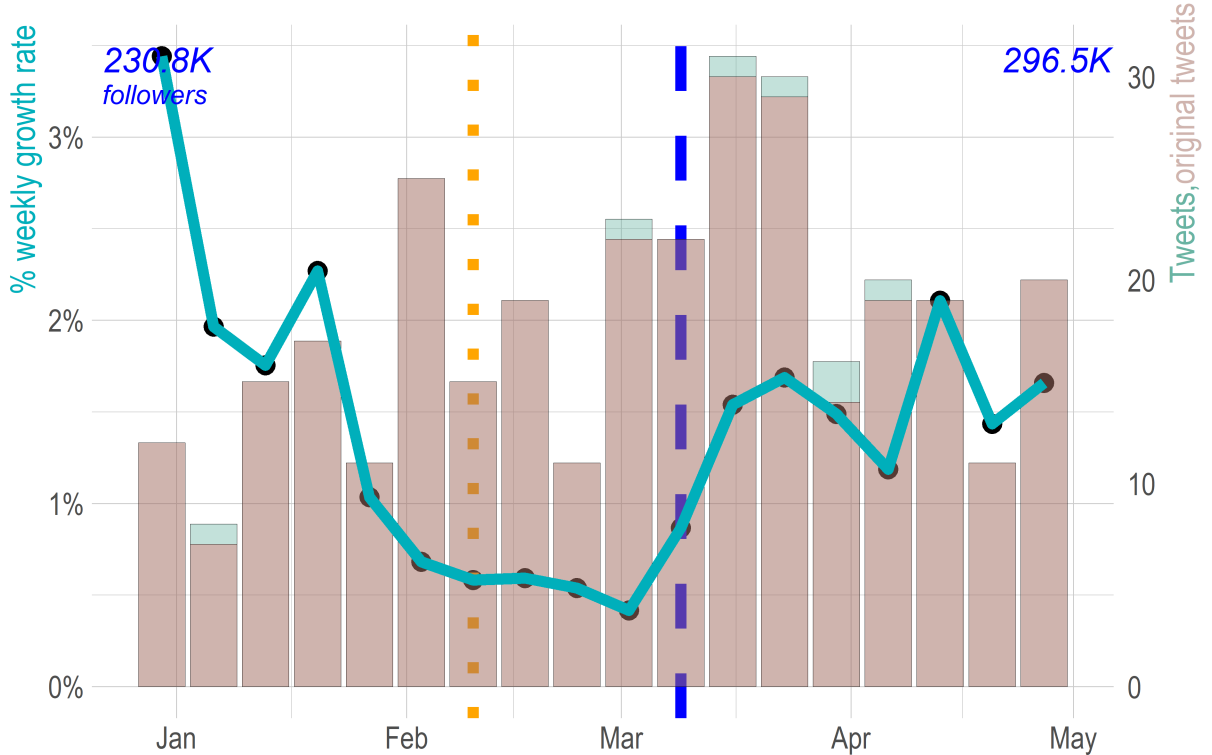

# Prime Minister Scott Morrison (Australia)

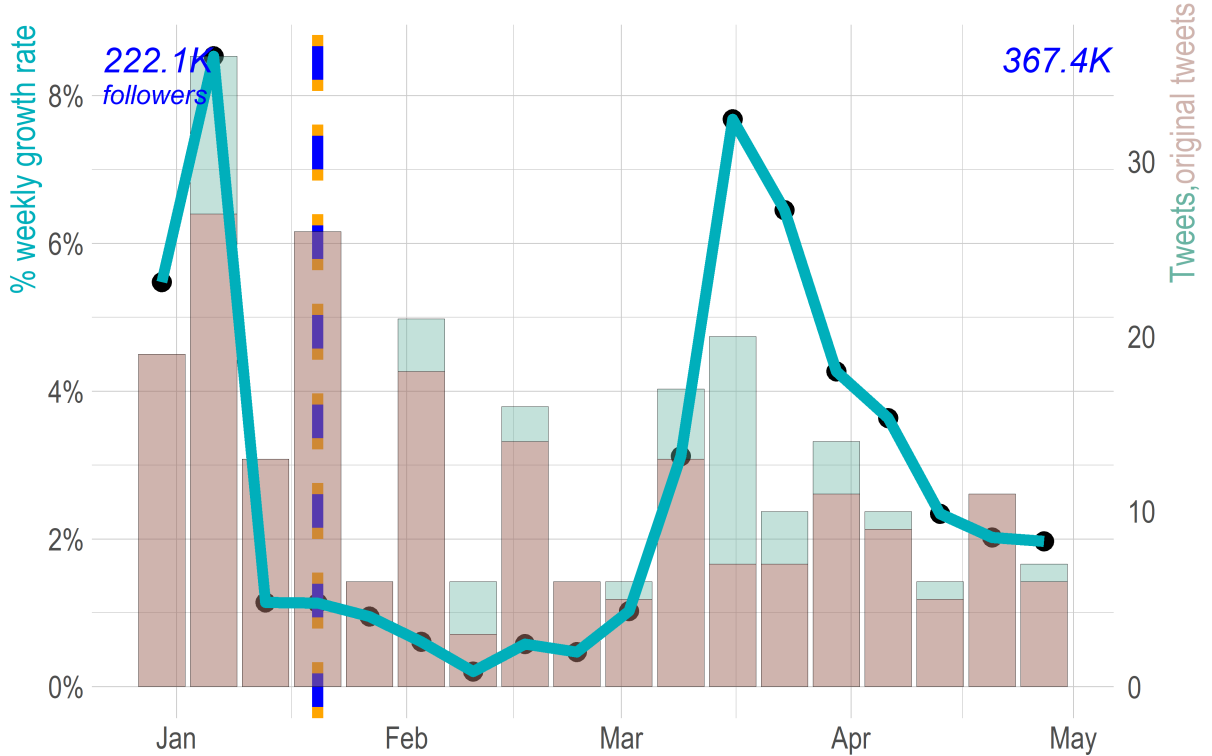



# President Laurentino "Nito" Cortizo (Panama)

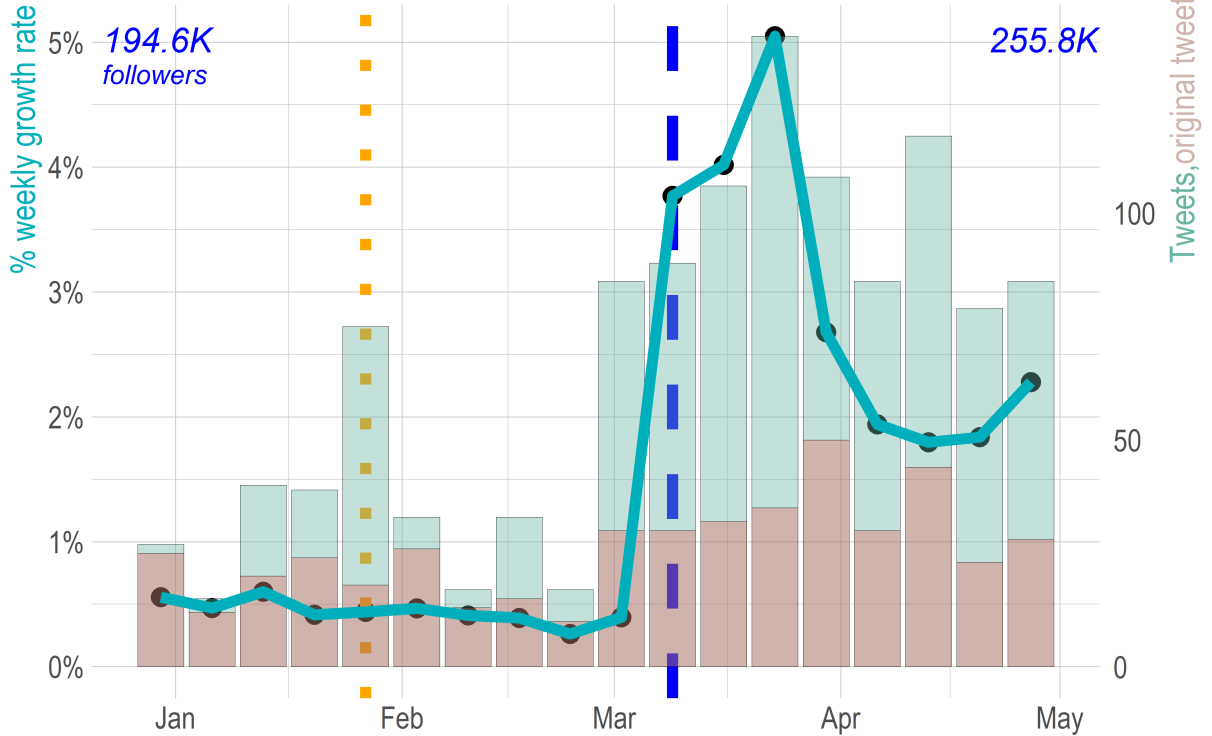

# President Roch Marc Christian Kaboré (Burkina Faso)

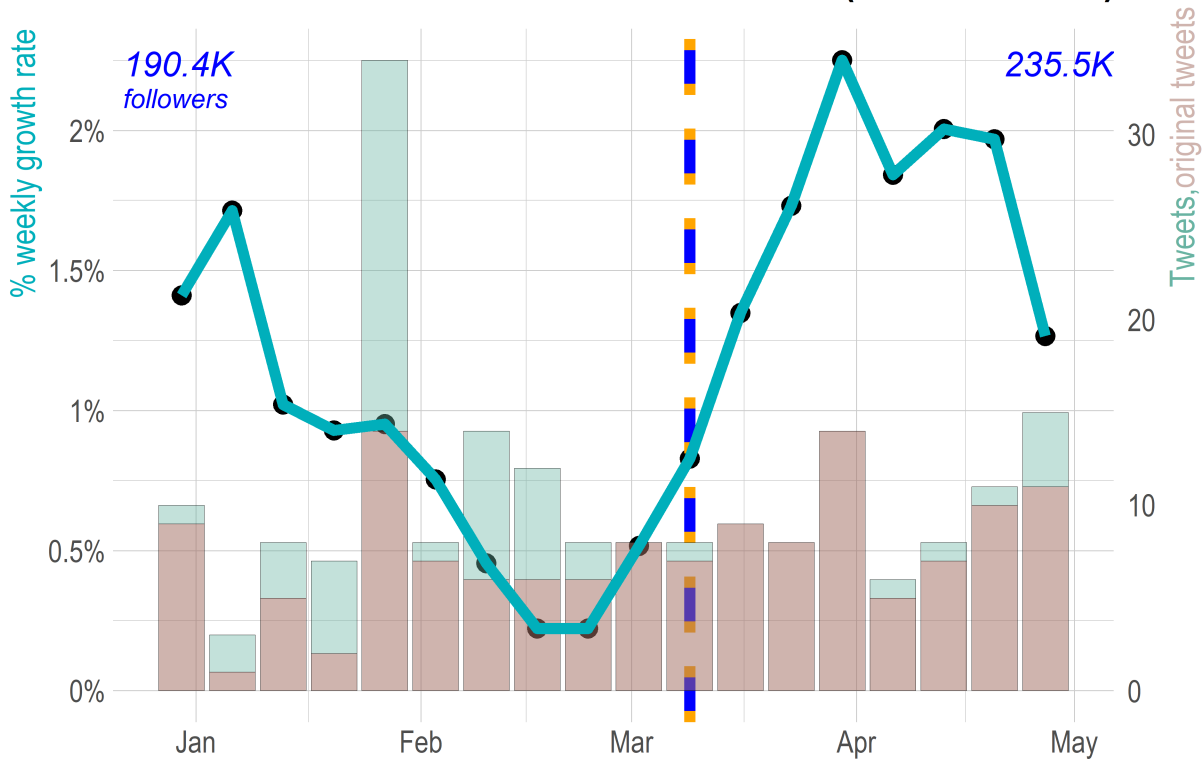

# President Sauli Niinistö (Finland)

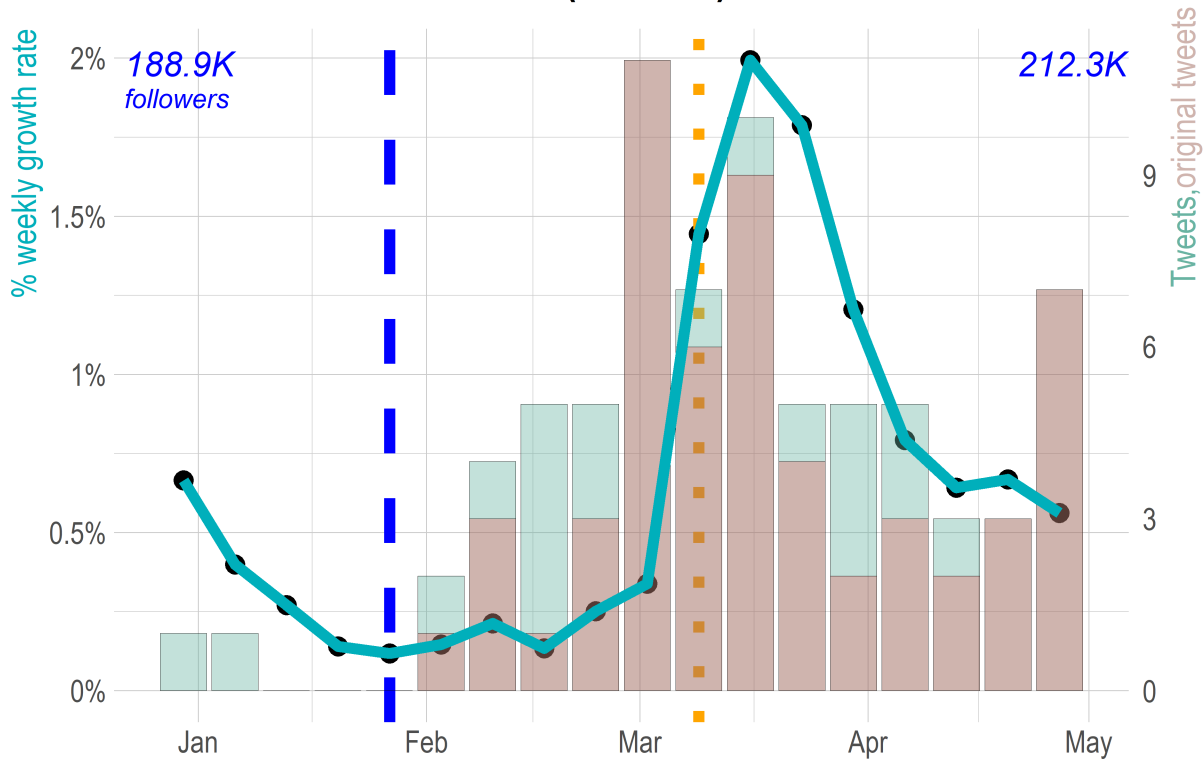

# President Volodymyr Zelensky (Ukraine)

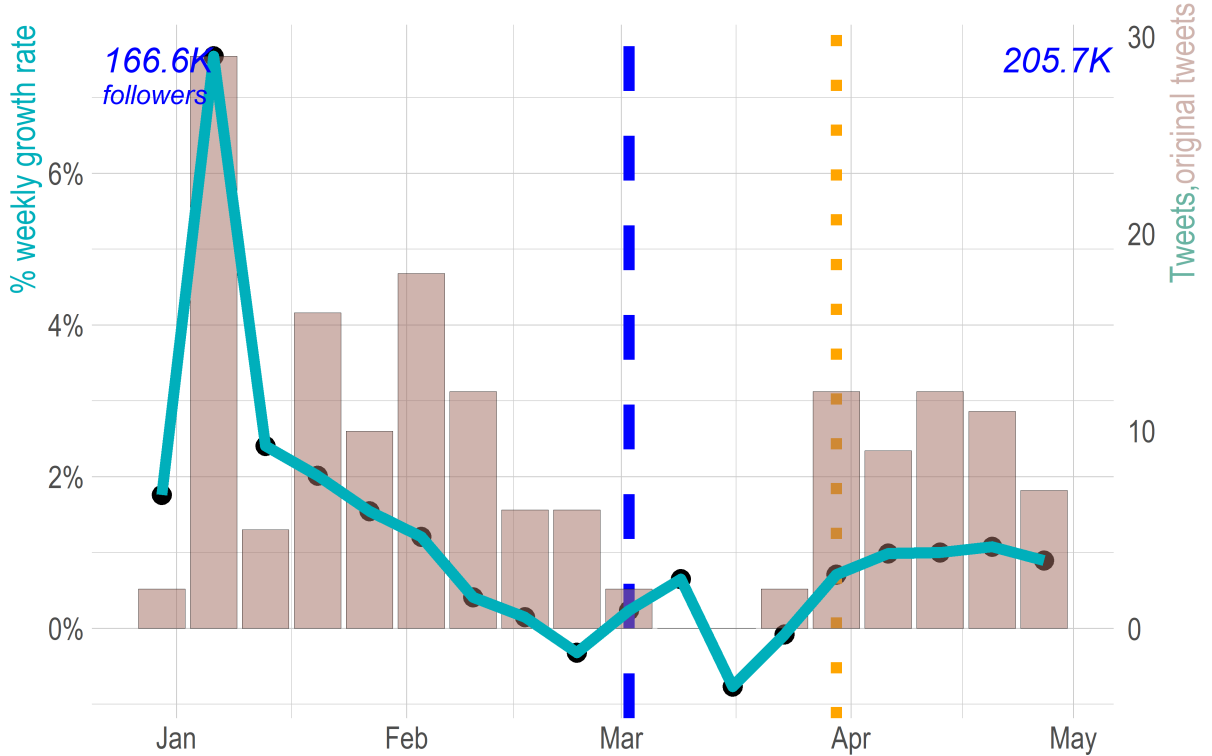

# President Klaus Iohannis (Romania)

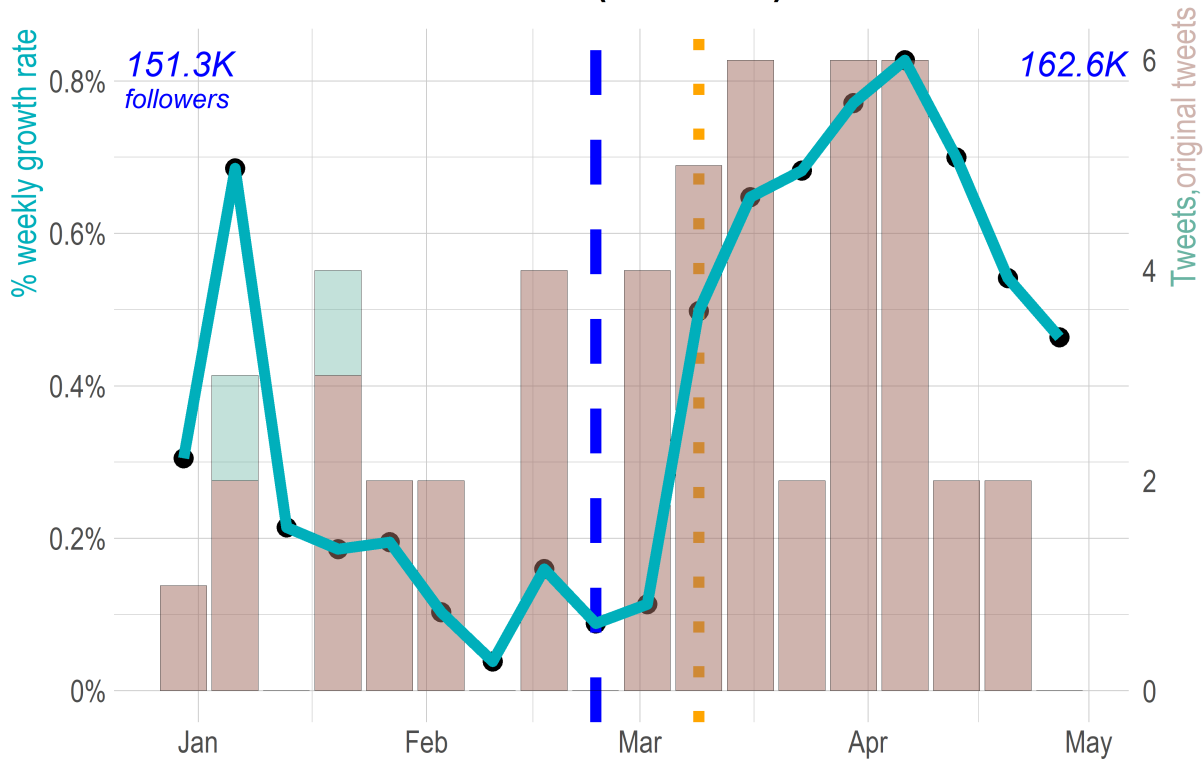

# President Hage Geingob (Namibia)

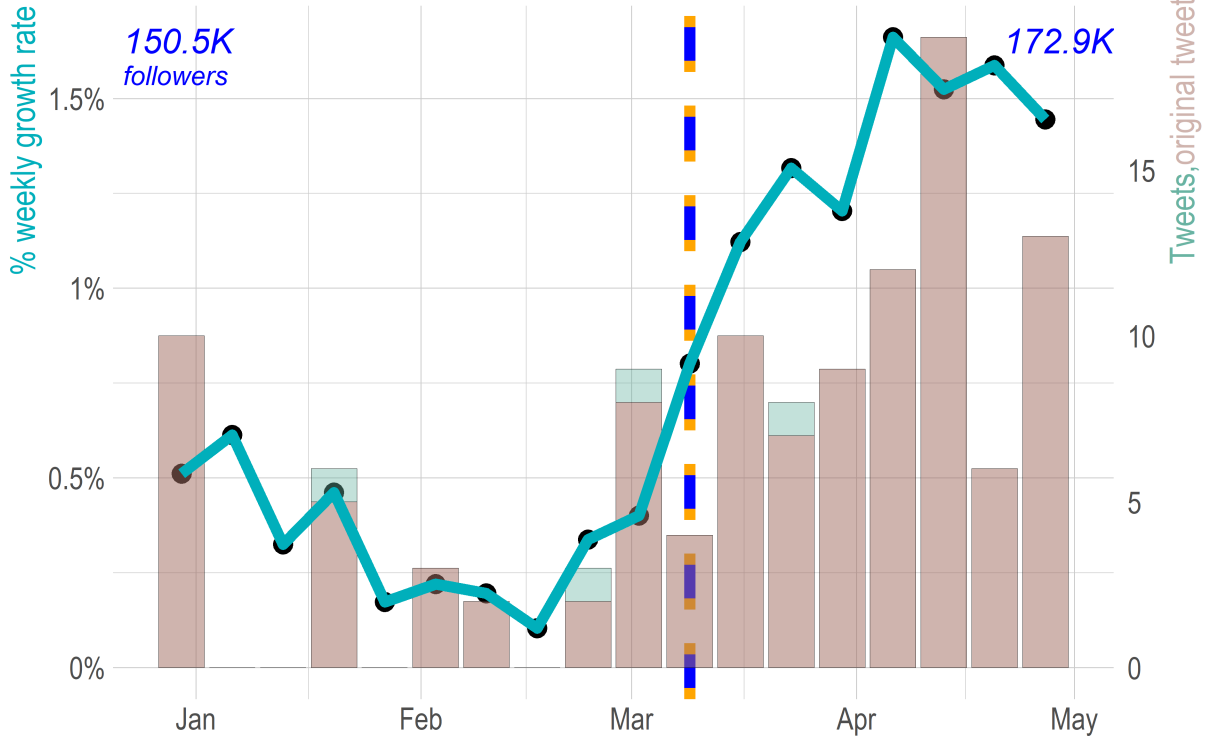



# President Kassym-Jomart Tokayev (Kazakhstan)

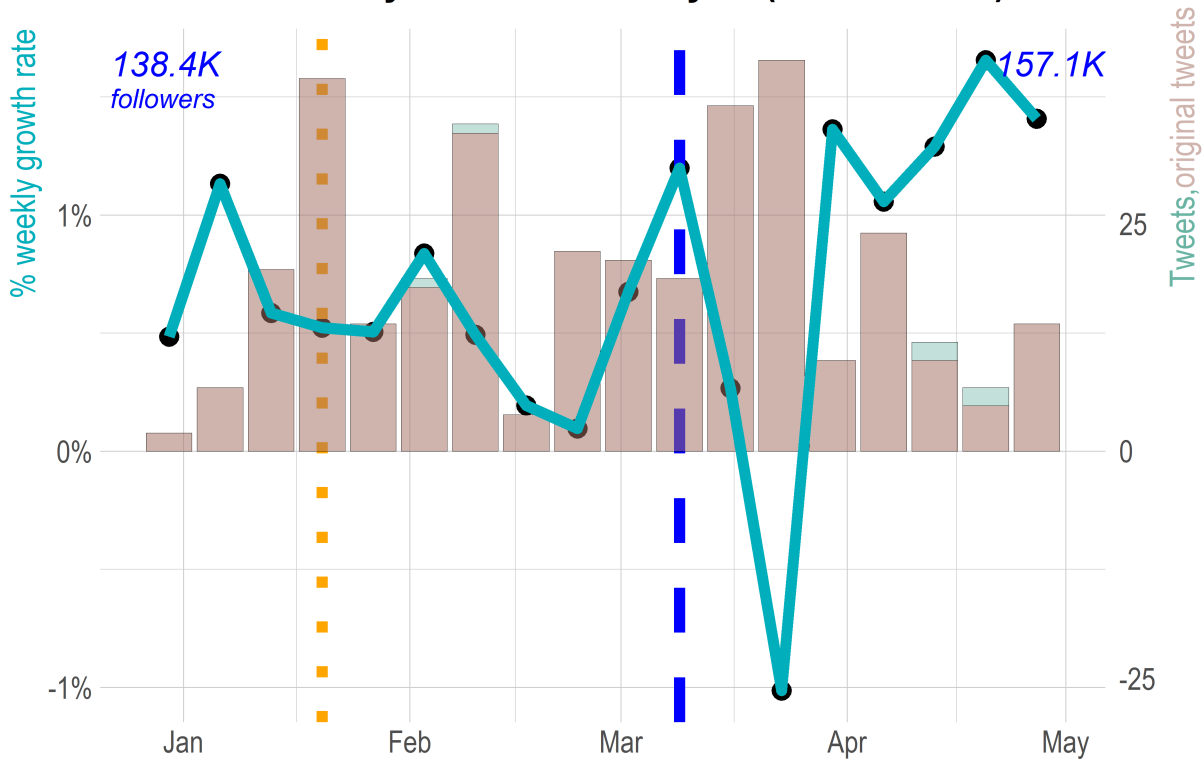



# President Ali Bongo Ondimba (Gabon)

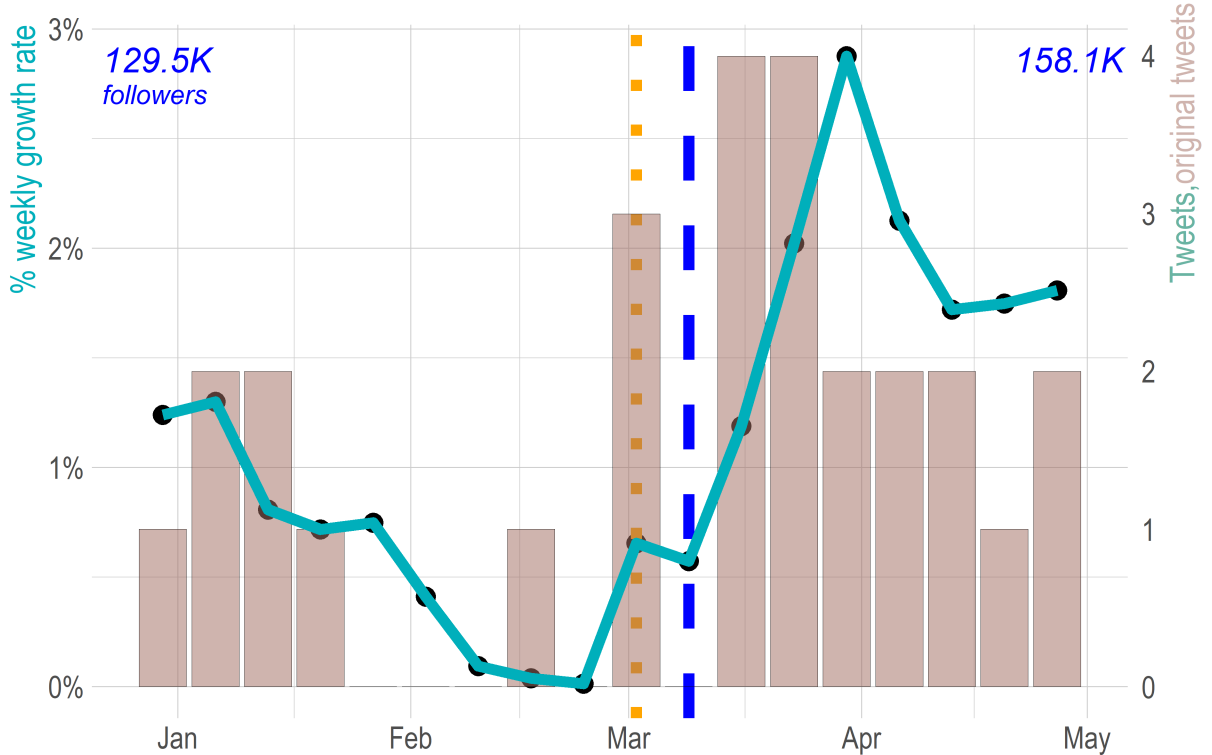

# President Gotabaya Rajapaksa (Sri Lanka)

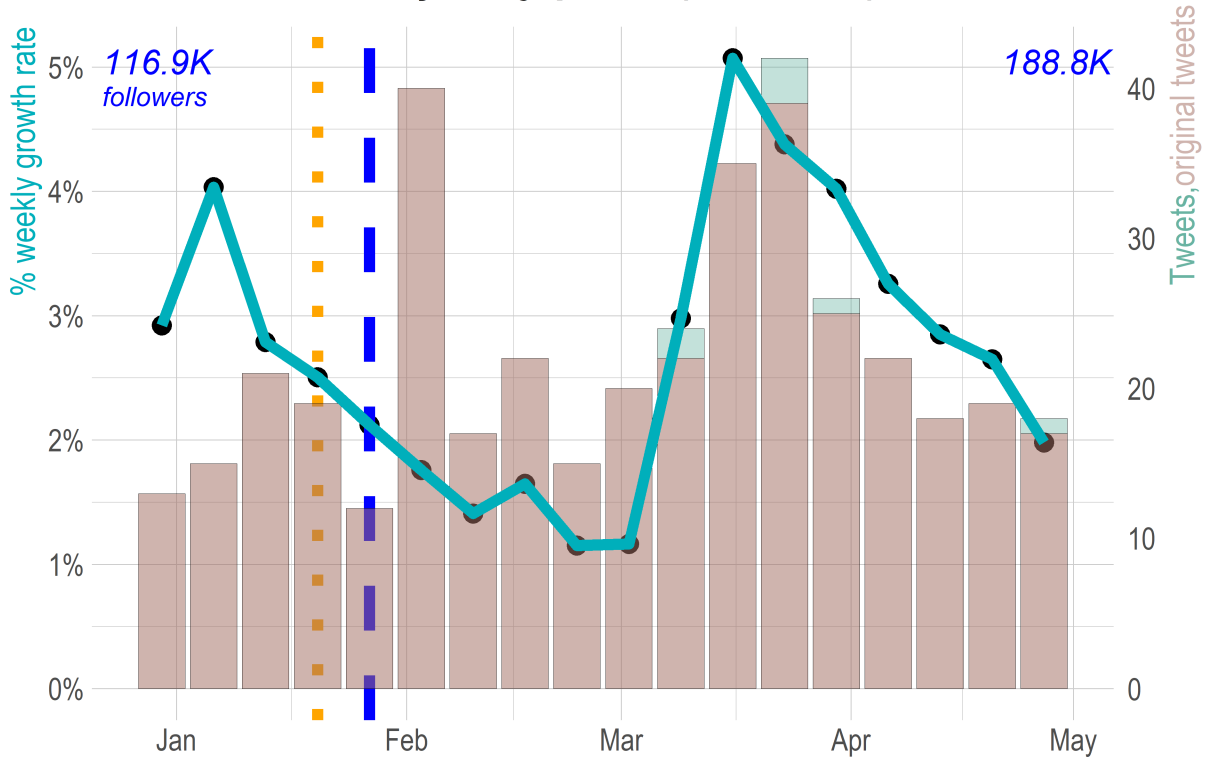

# President Carlos Alvarado Quesada (Costa Rica)

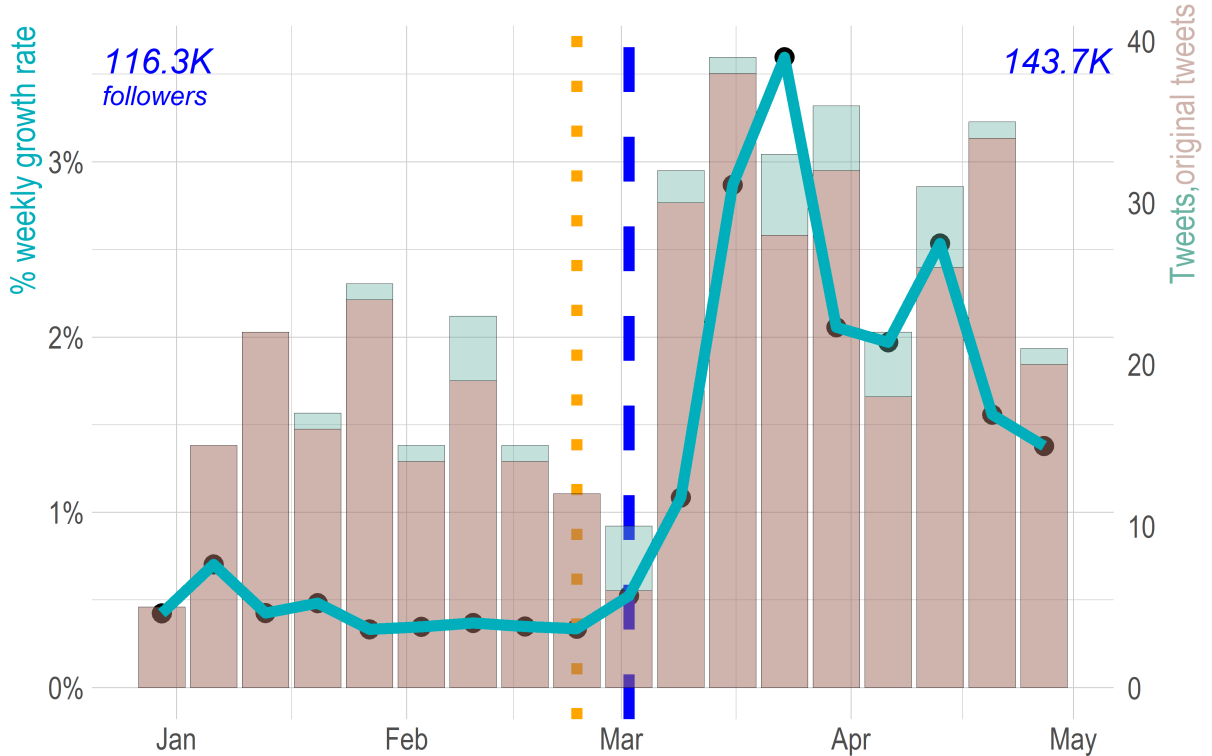

# Prime Minister Abiy Ahmed (Ethiopia)

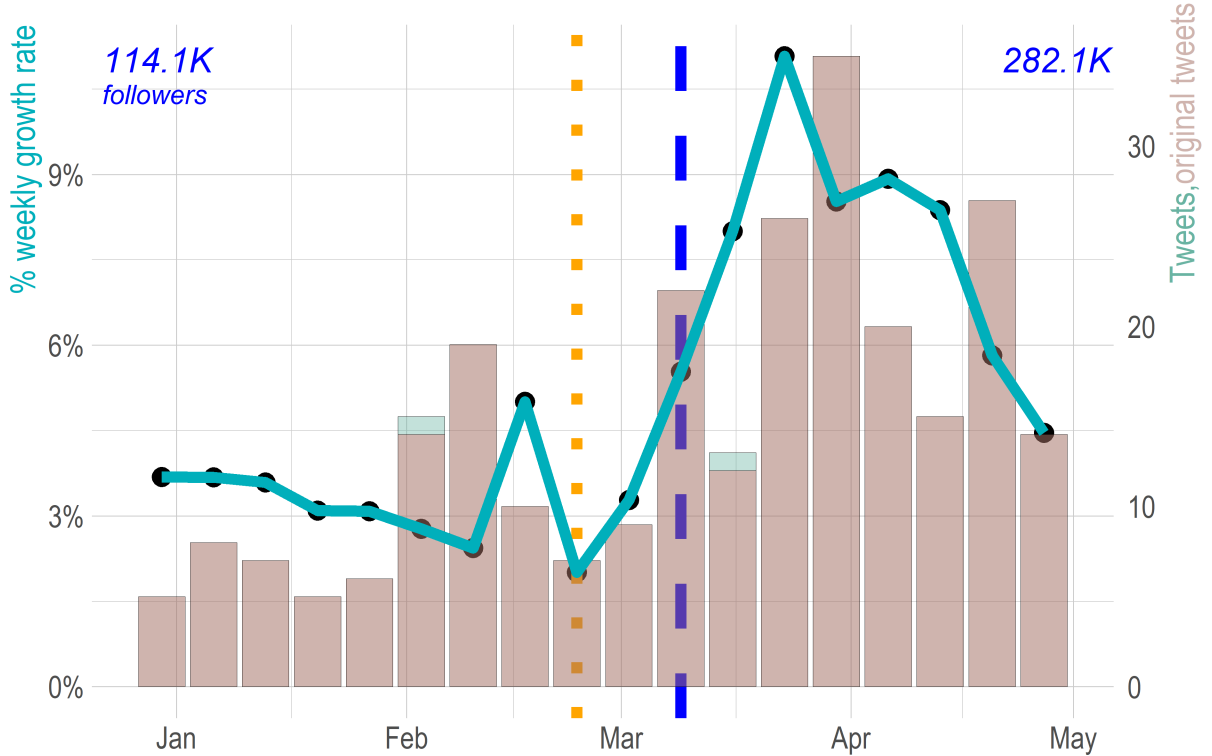

# Prime Minister Saadeddine Othmani (Morocco)

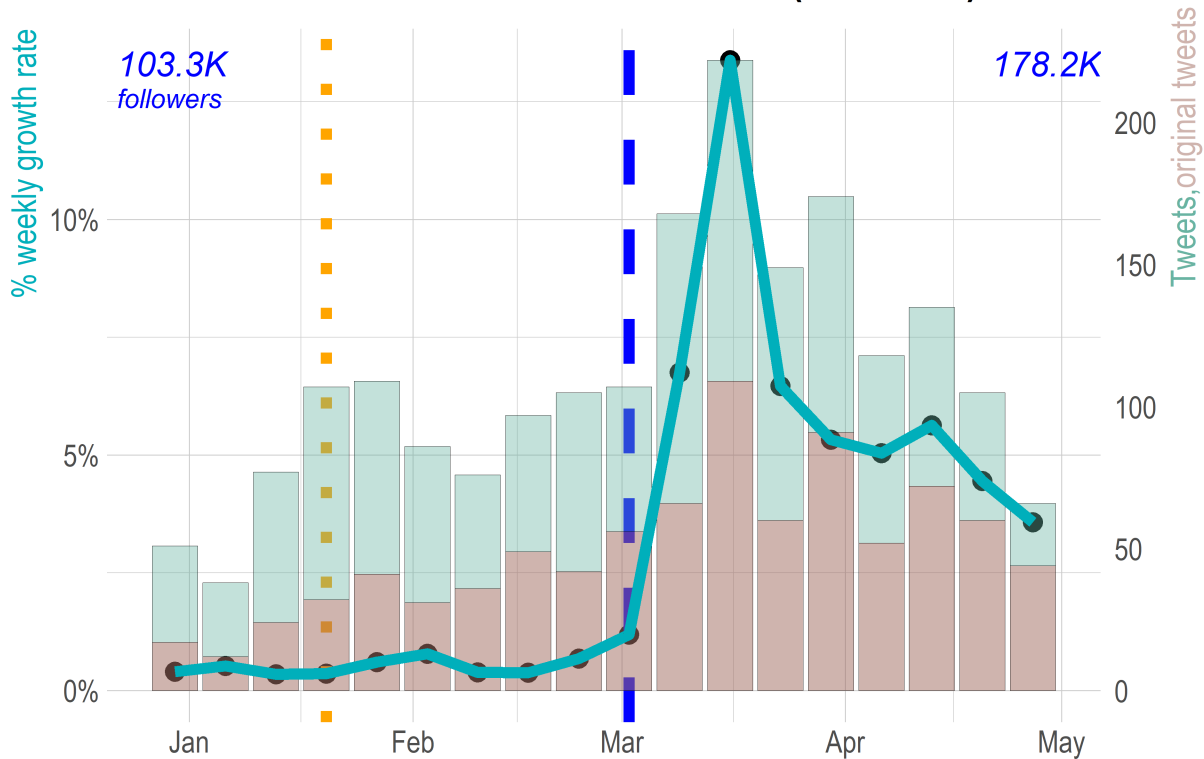

# Prime Minister António Costa (Portugal)

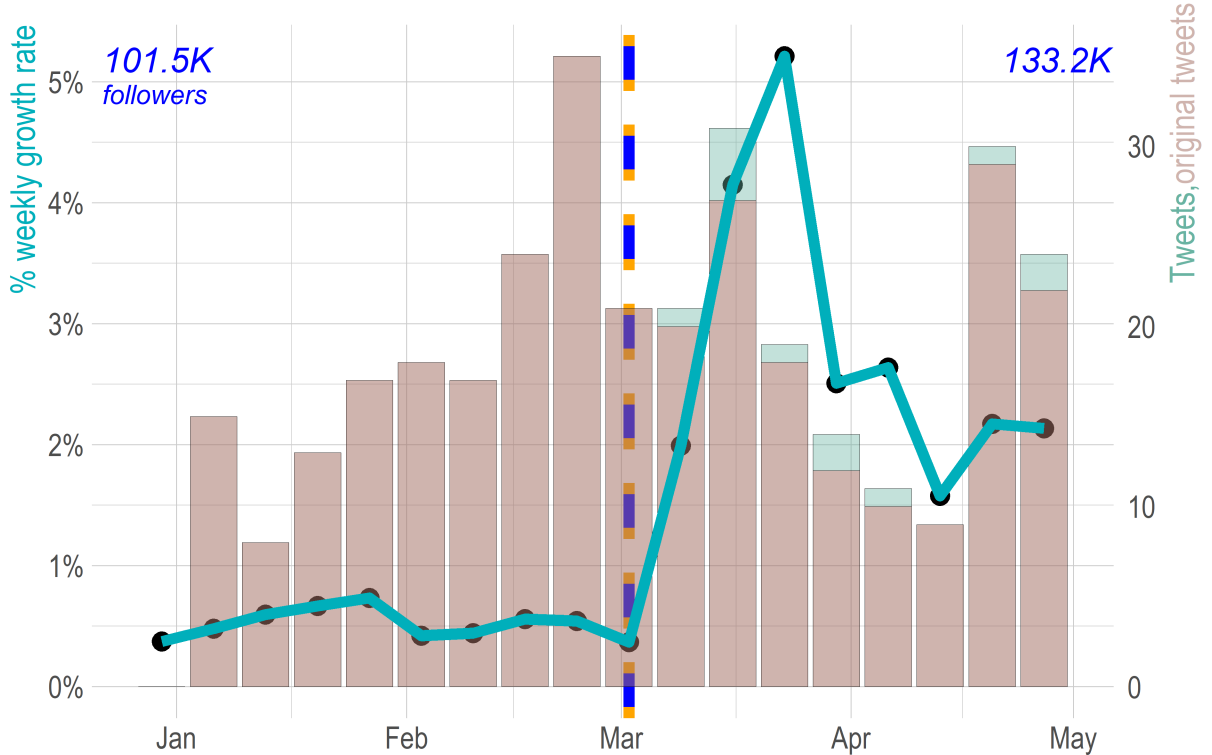

# President Faure Gnassingbe (Togo)

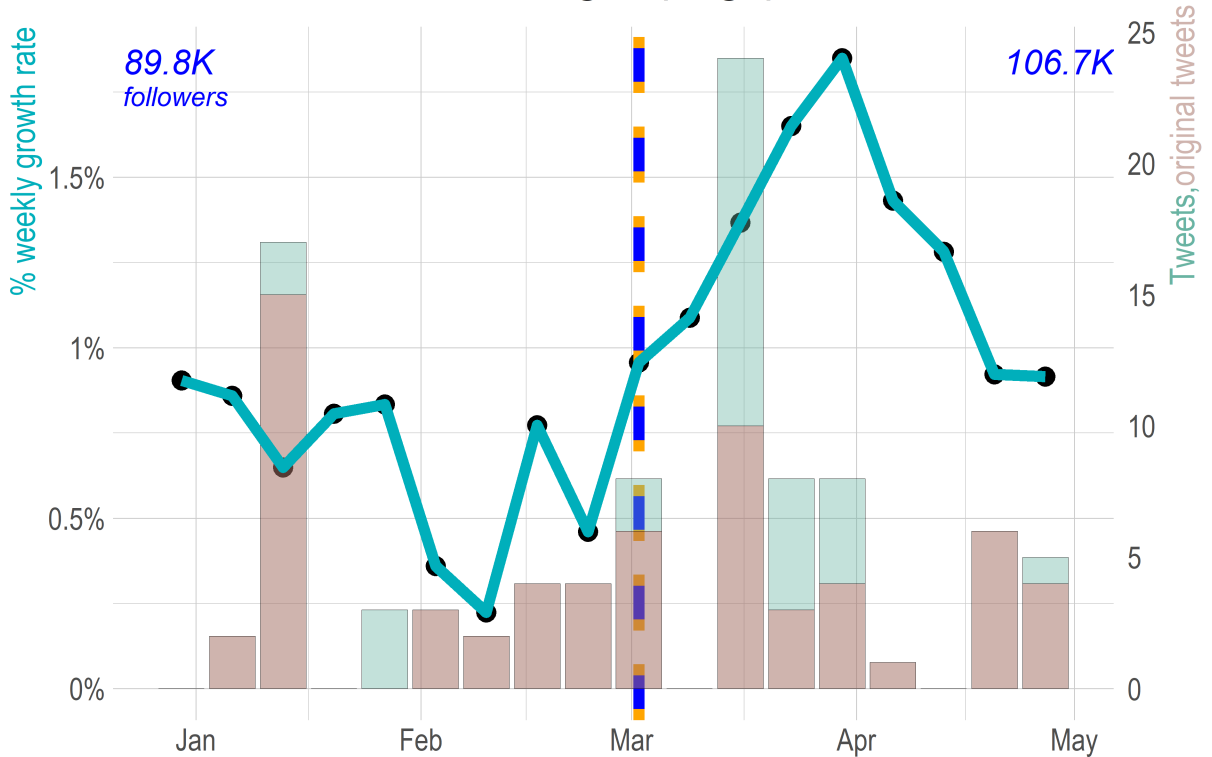





# Prime Minister Boyko Borissov (Bulgaria)

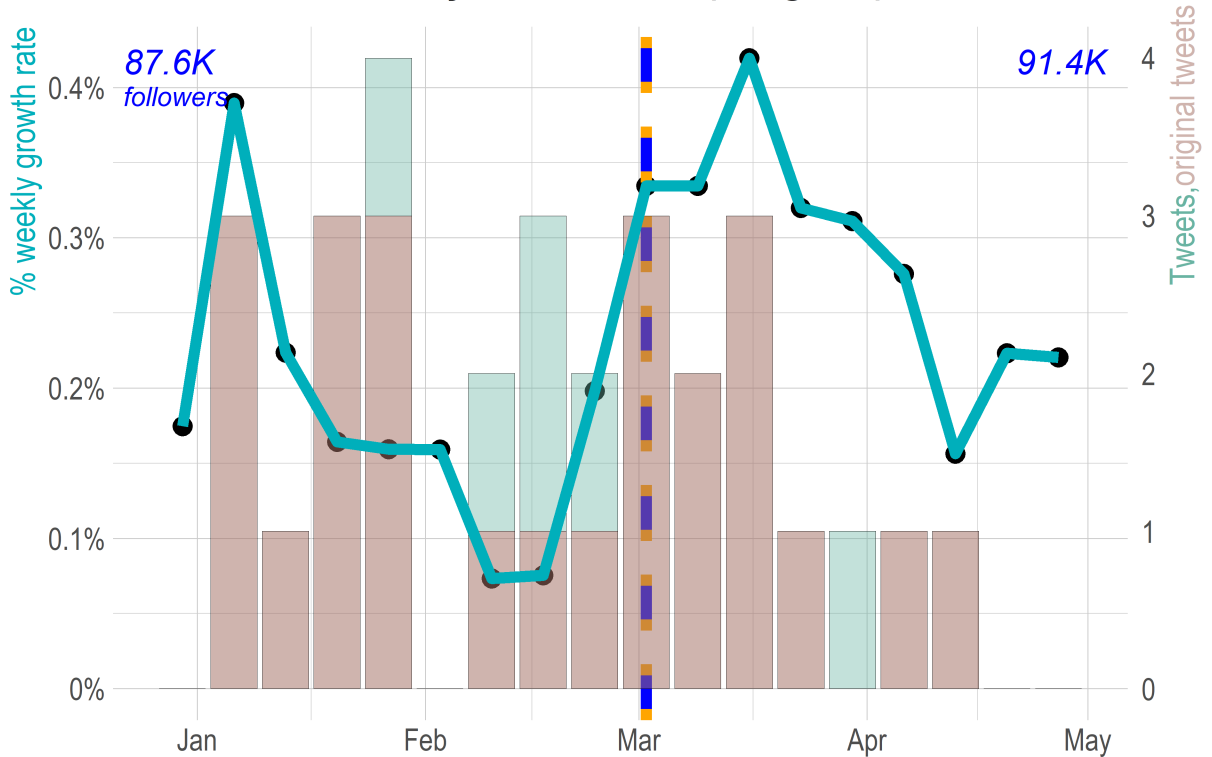

# Prime Minister Sanna Marin (Finland)

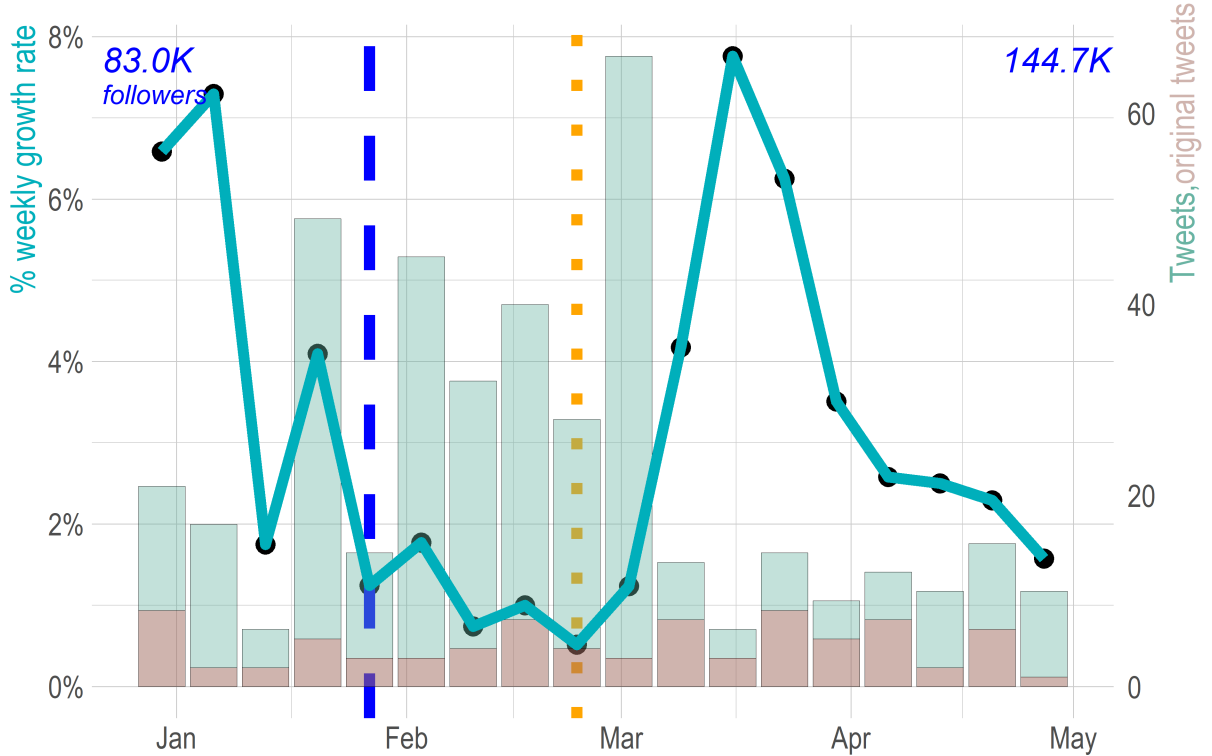

# Prime Minister Andrew Holness (Jamaica)

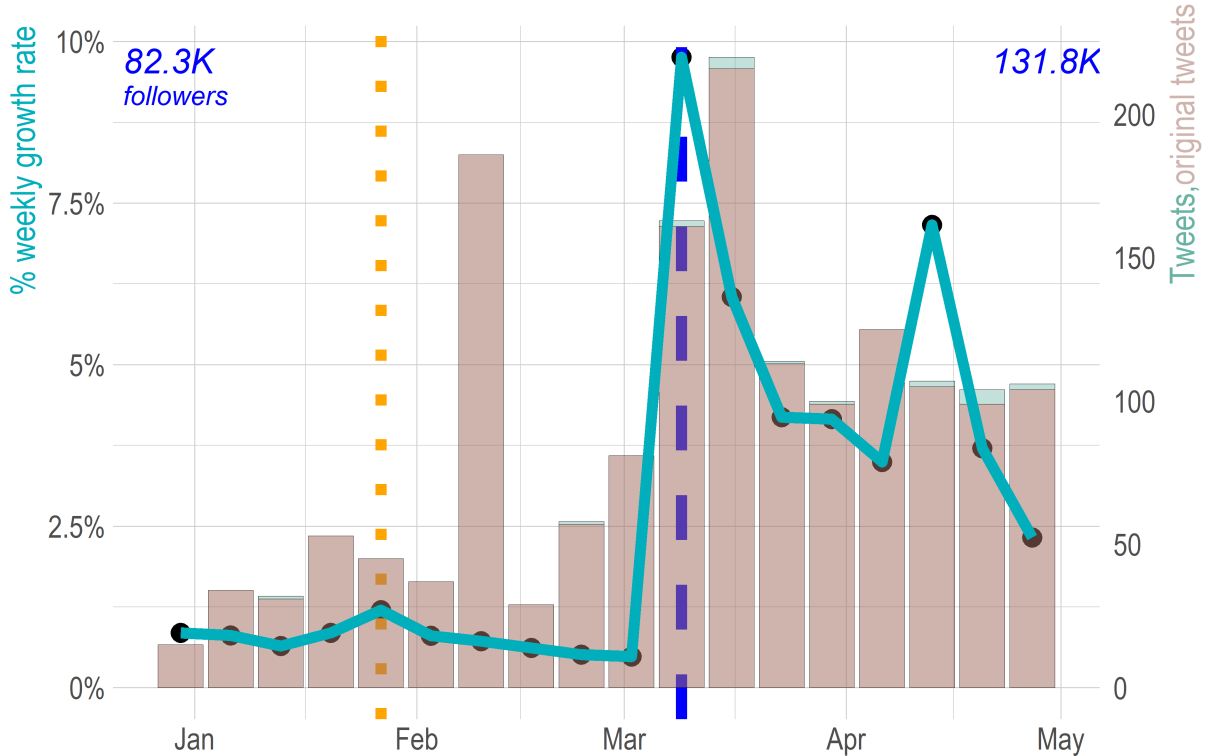

# Prime Minister Xavier Bettel (Luxembourg)

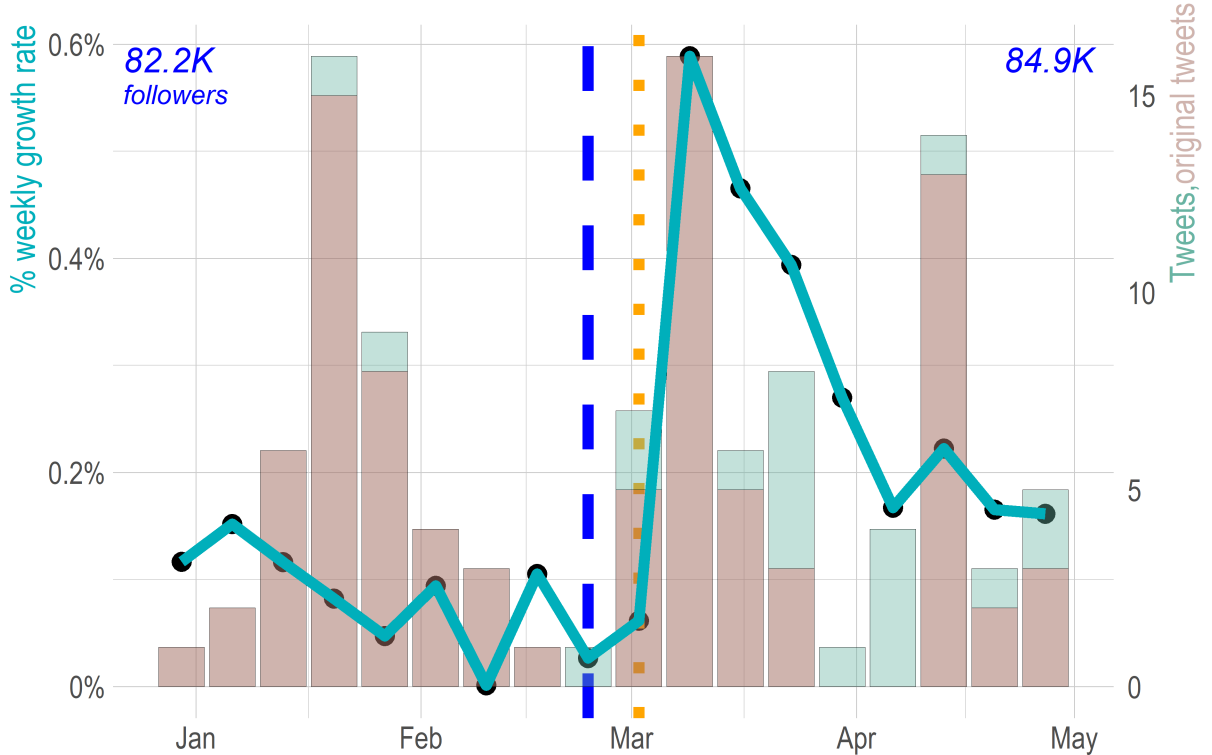

# President Ibrahim Mohamed Solih (Maldives)

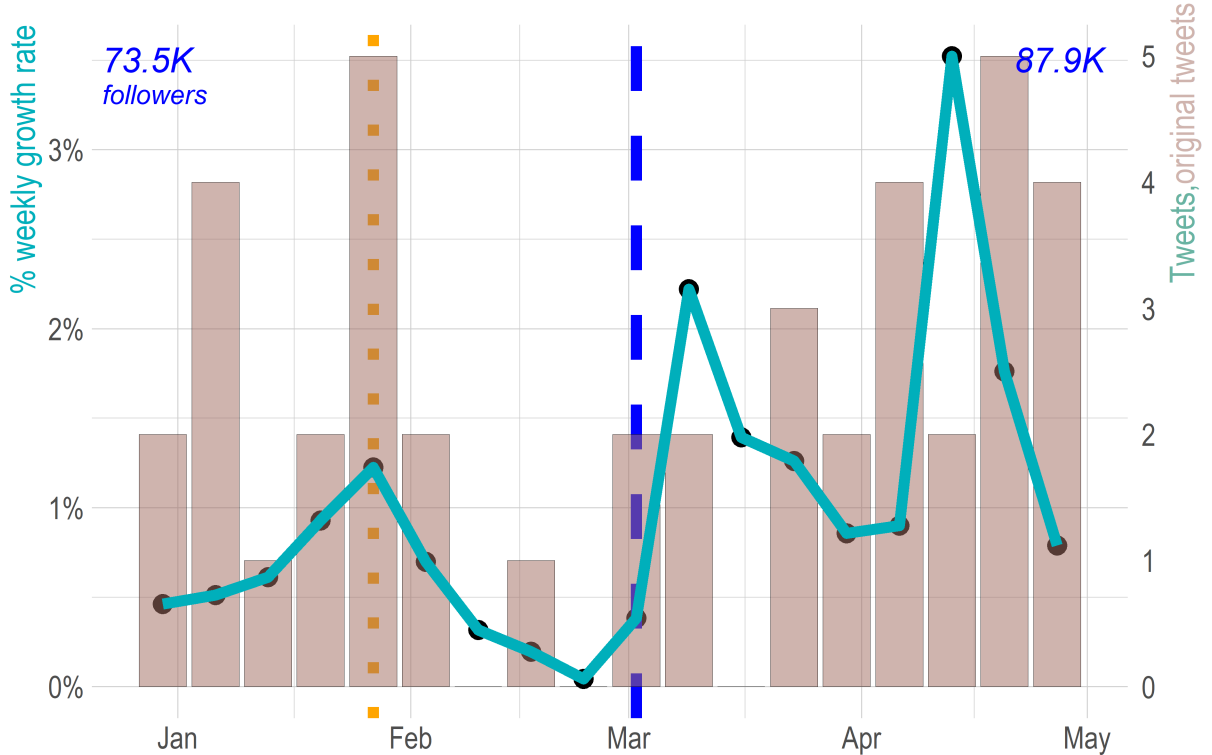

# President Mahamadou Issoufou (Niger)

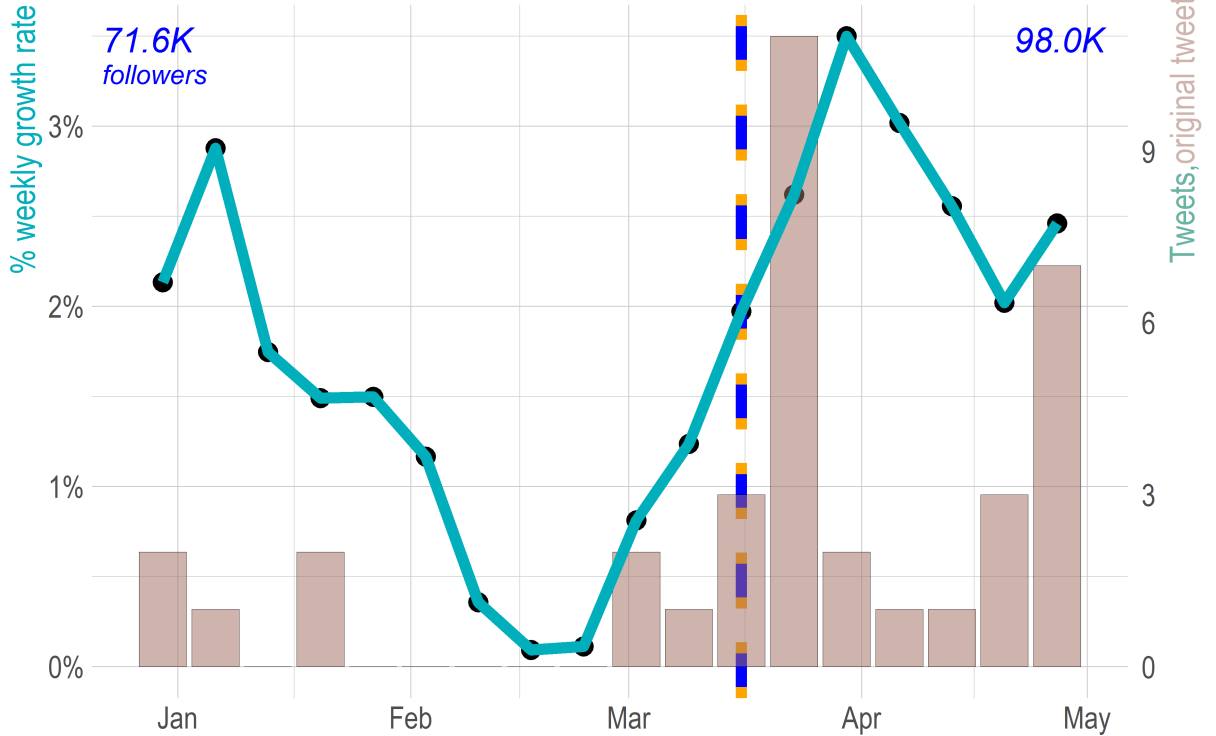

# President Mokgweetsi Masisi (Botswana)

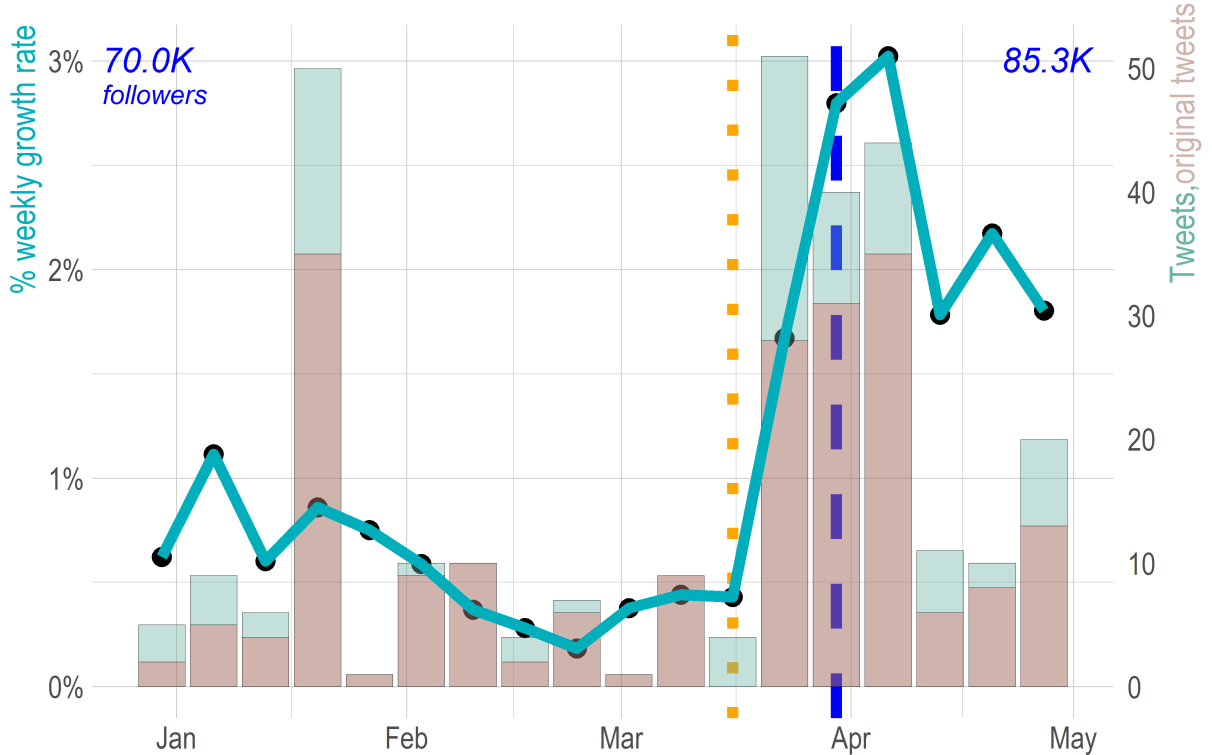

# Prime Minister Stefan Löfven (Sweden)

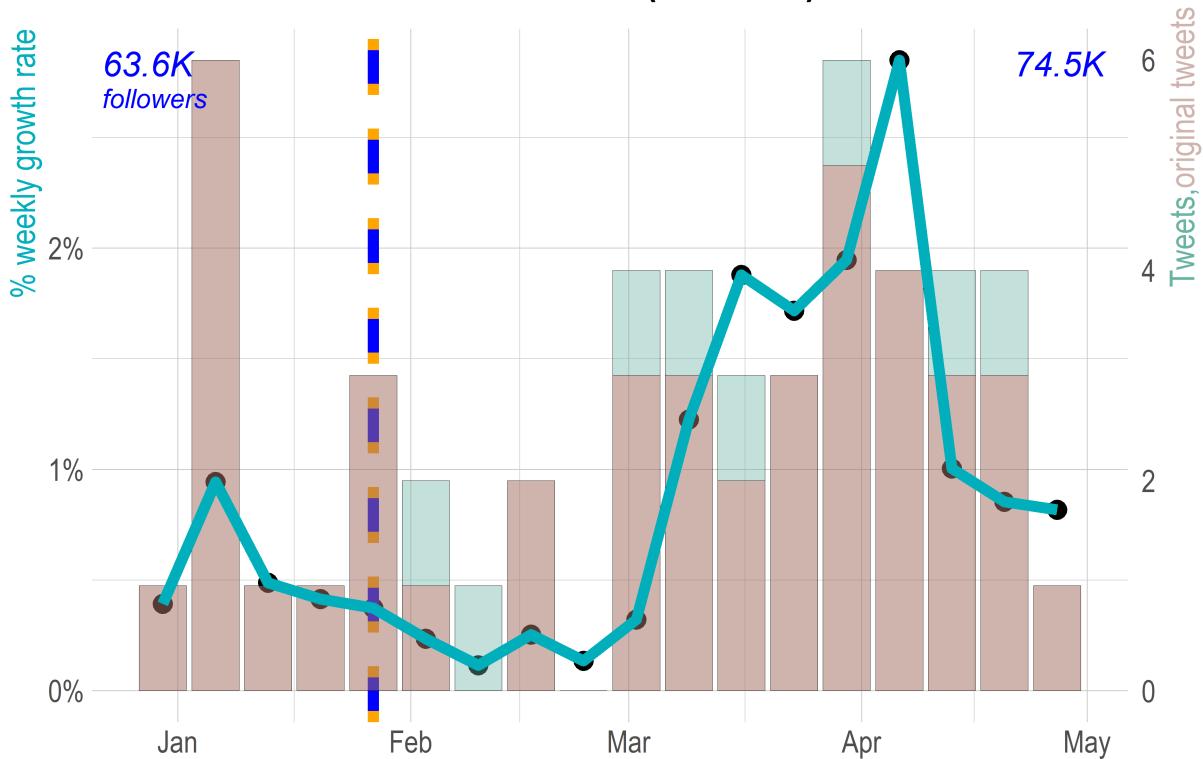



# President Edgar Lungu (Zambia)

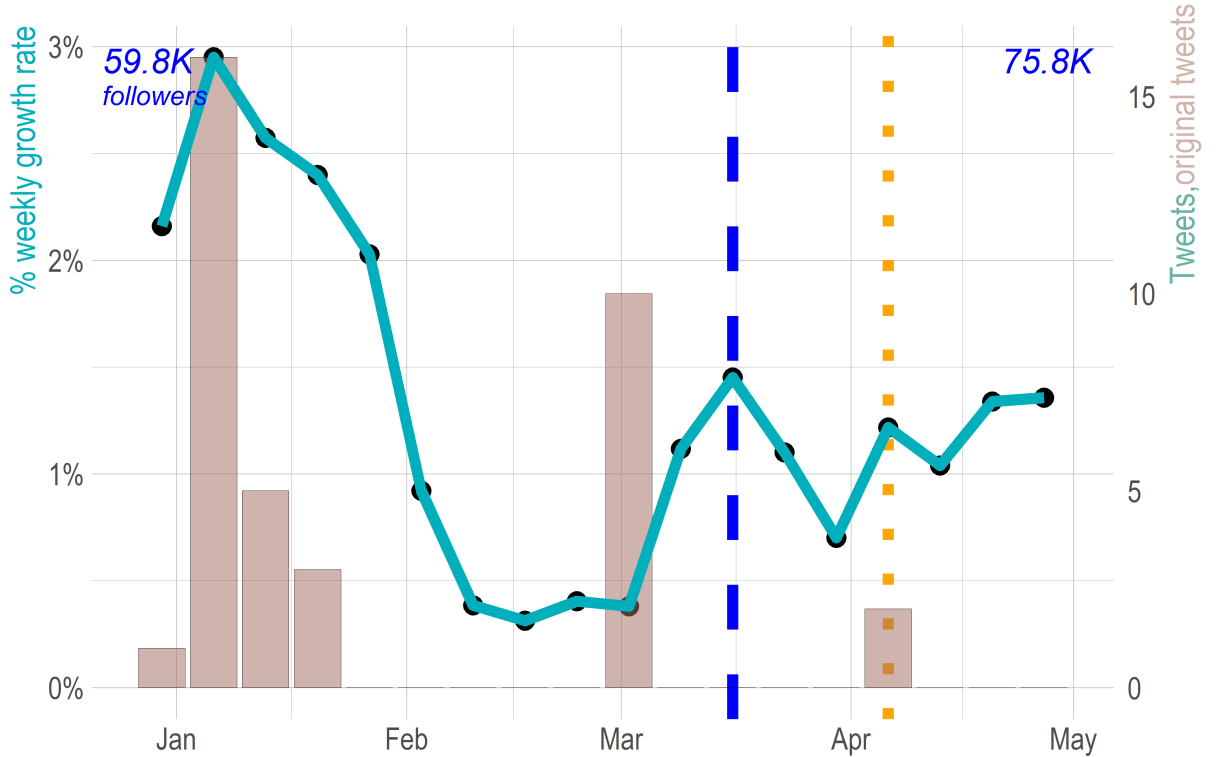

# Prime Minister Prayut Chan-o-cha (Thailand)

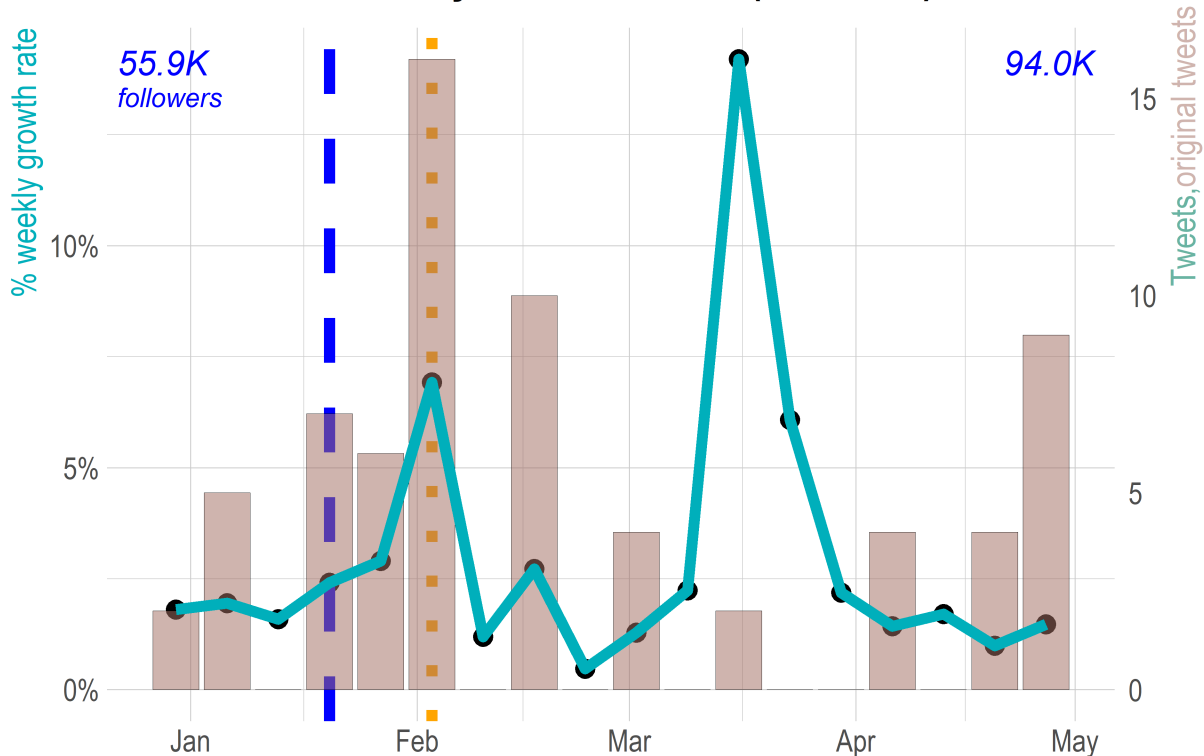

# Prime Minister Lotay Tshering (Bhutan)

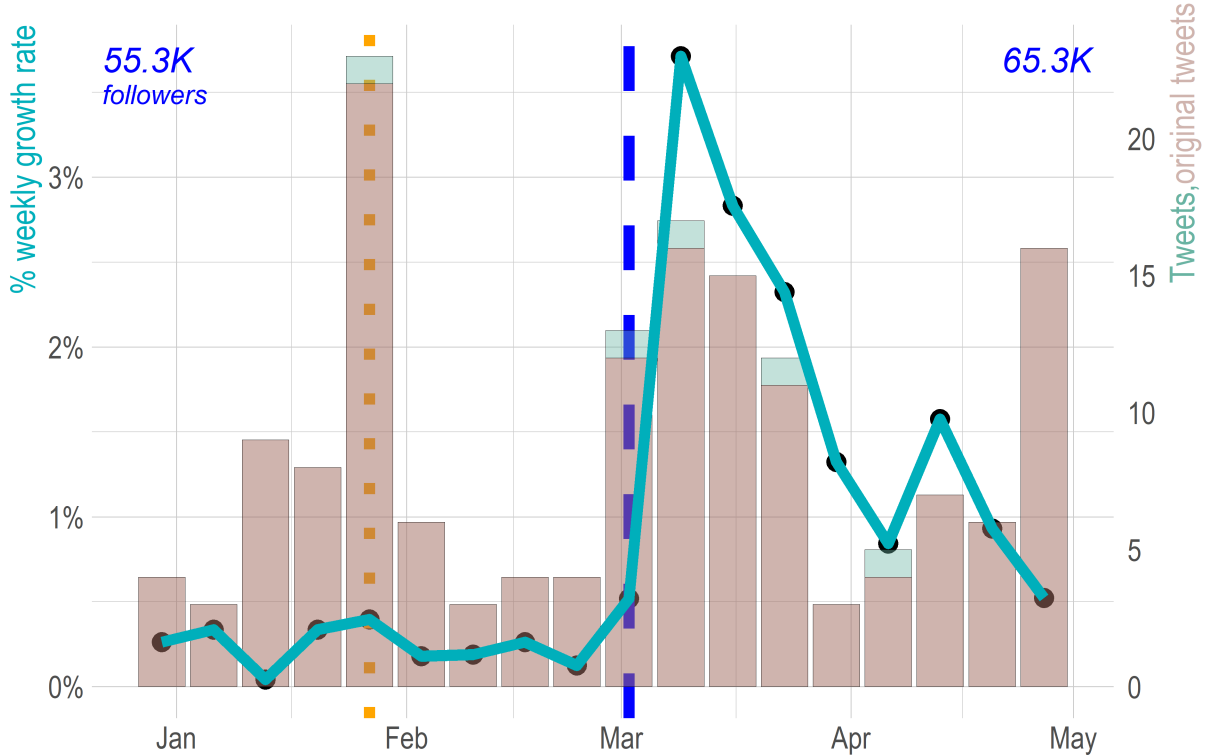

# President João Lourenço (Angola)

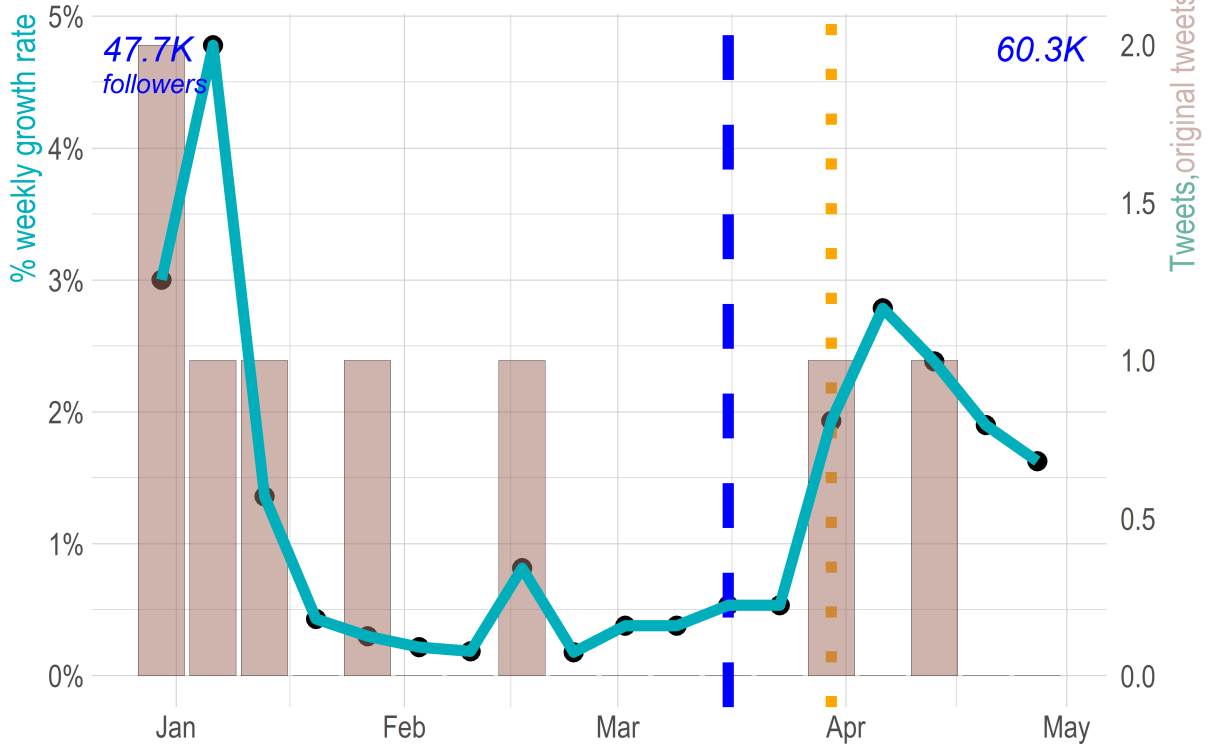

# President Zuzana Čaputová (Slovakia)

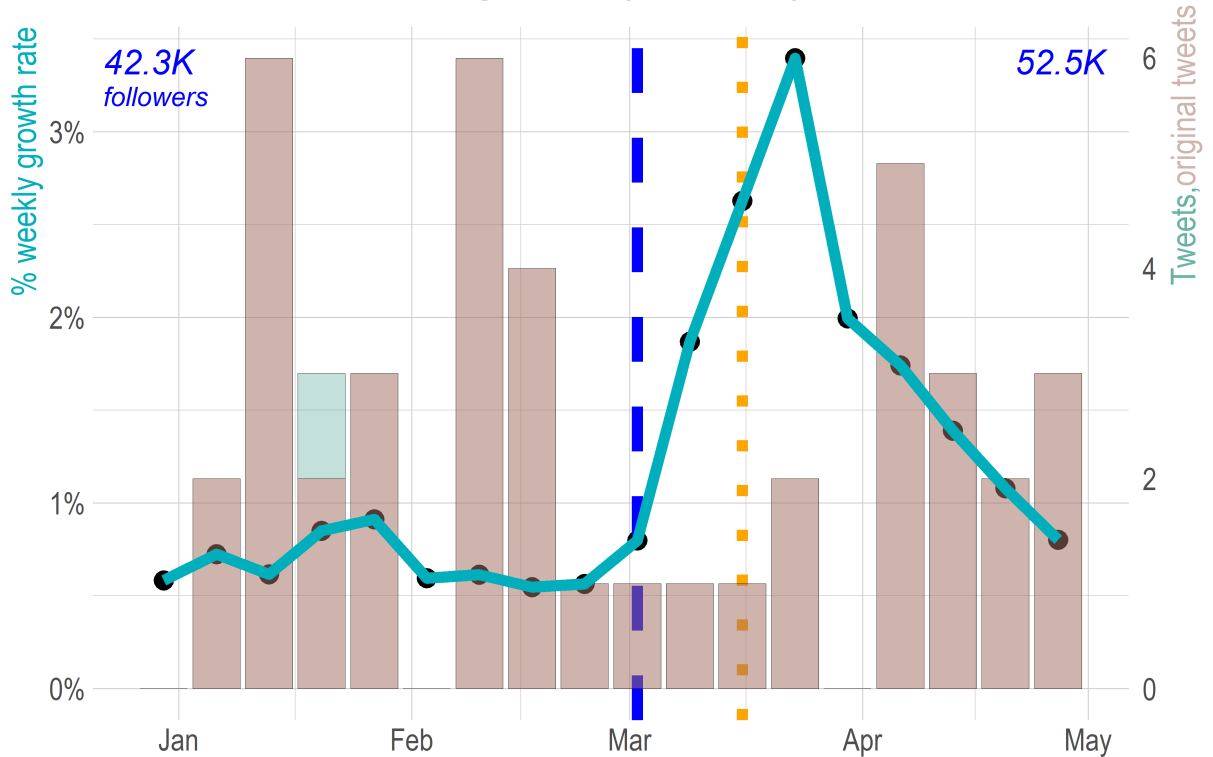

# Prime Minister Frank Bainimarama (Fiji)

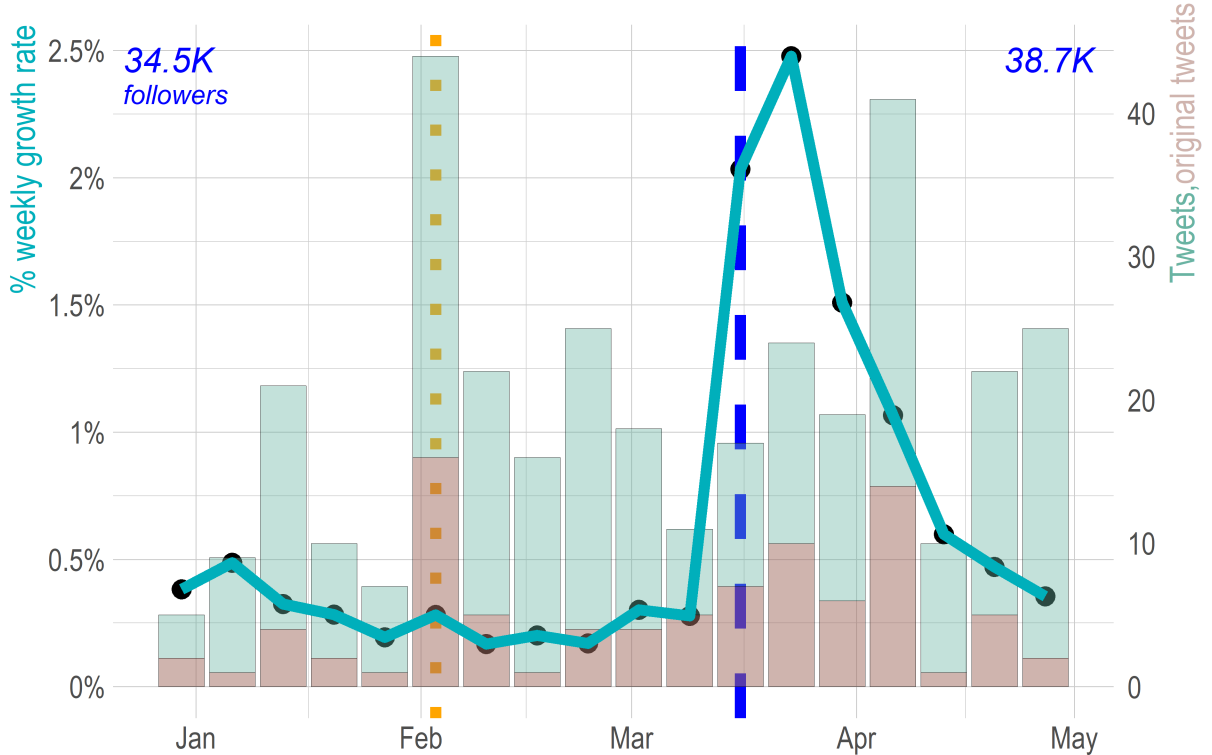

# President Ismail Omar Guelleh (Djibouti)

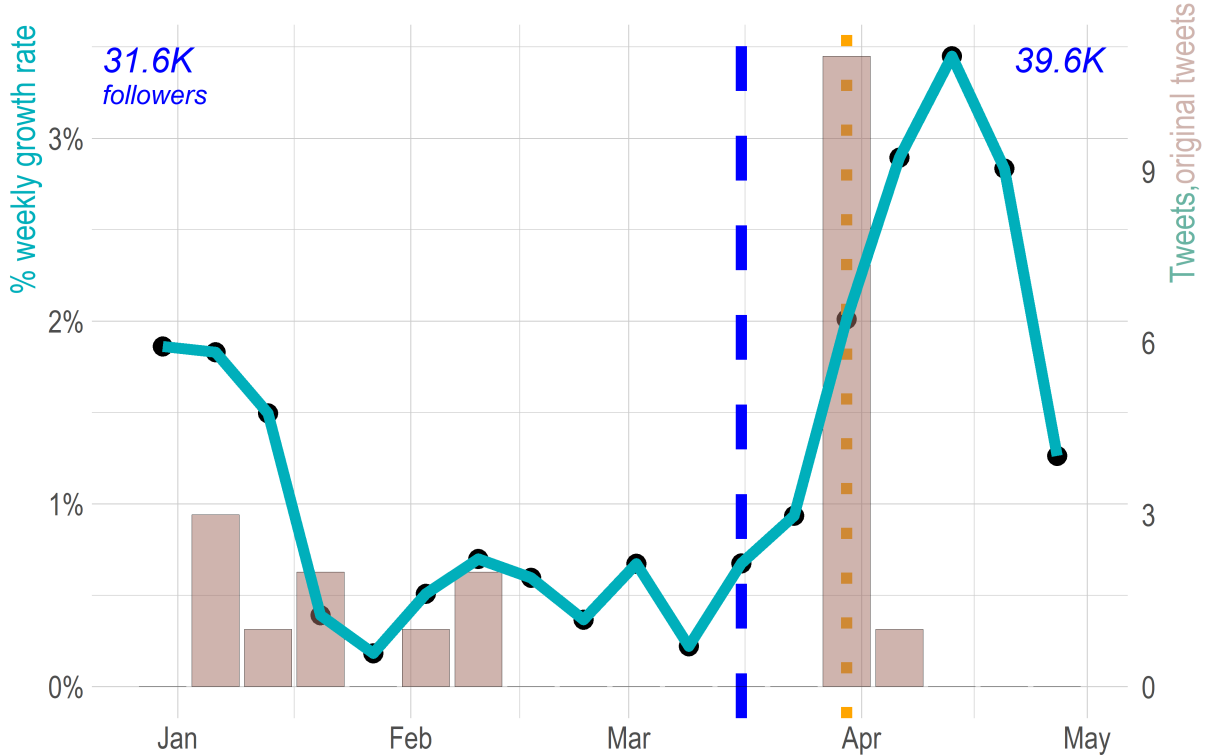

# Prime Minister Andrej Plenković (Croatia)

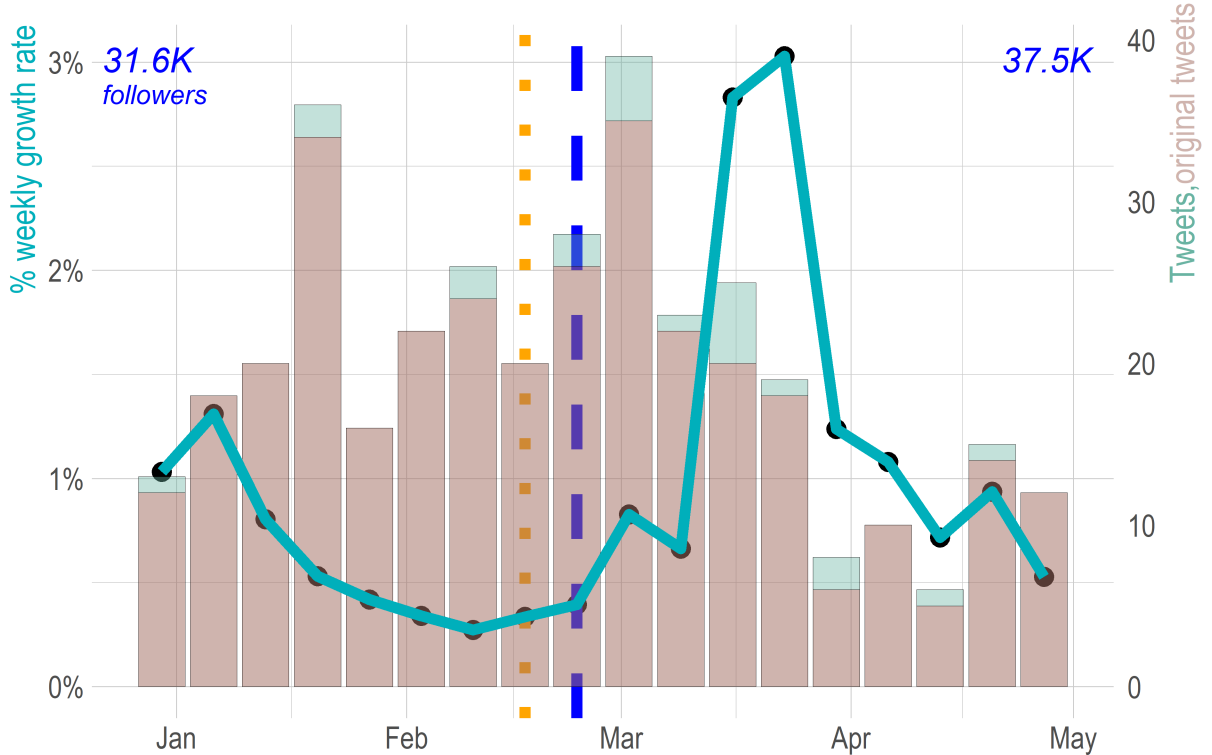



# President Kersti Kaljulaid (Estonia)

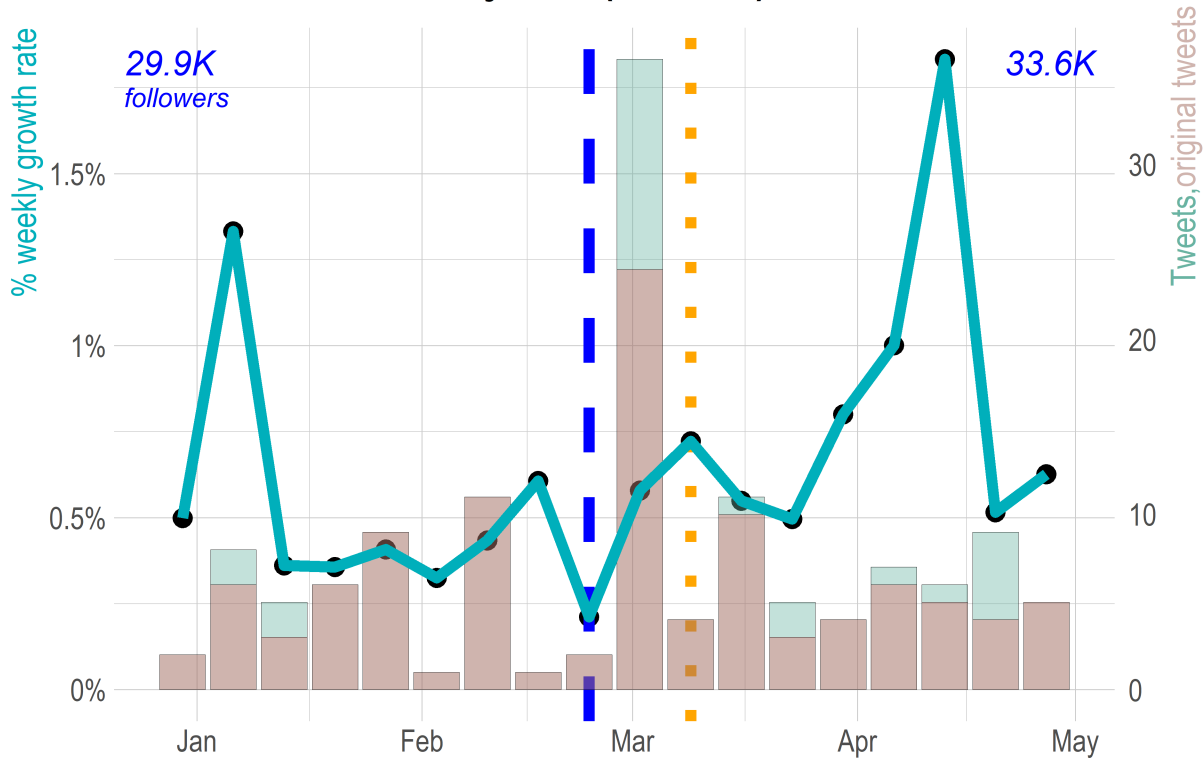

# Prime Minister Ana Brnabić (Serbia)

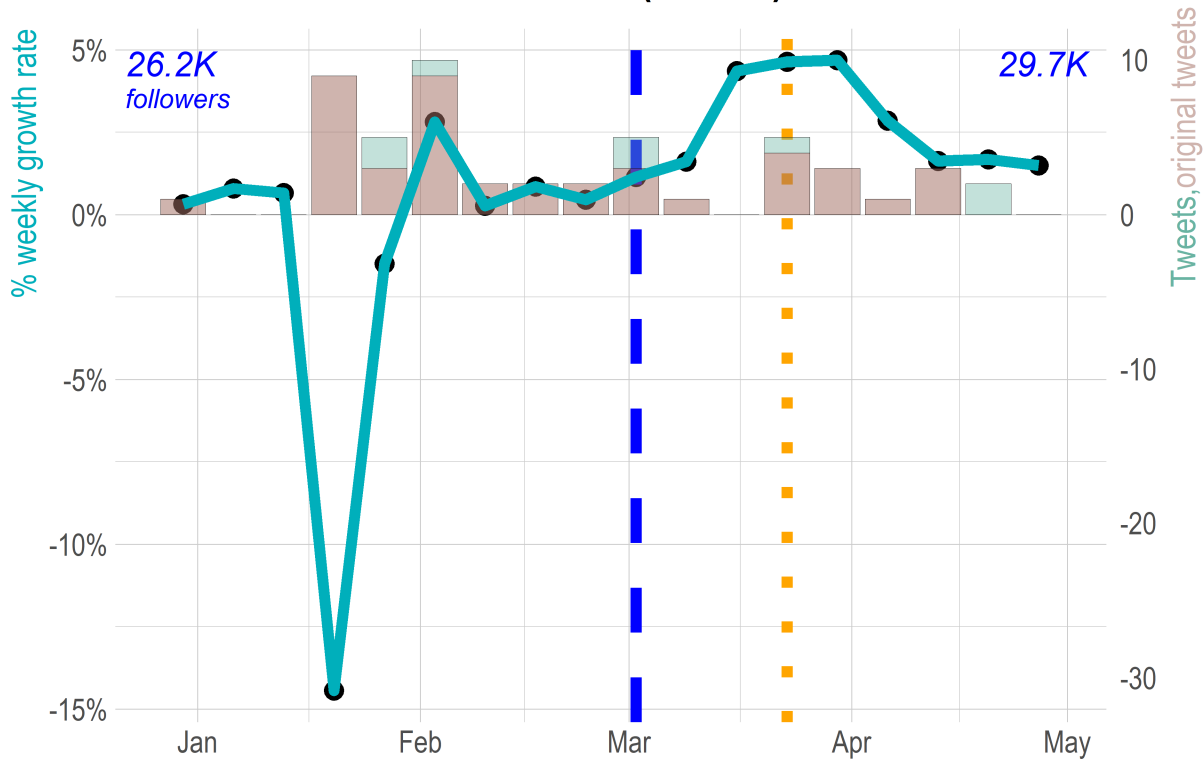

# Prime Minister Nikol Pashinyan (Armenia)

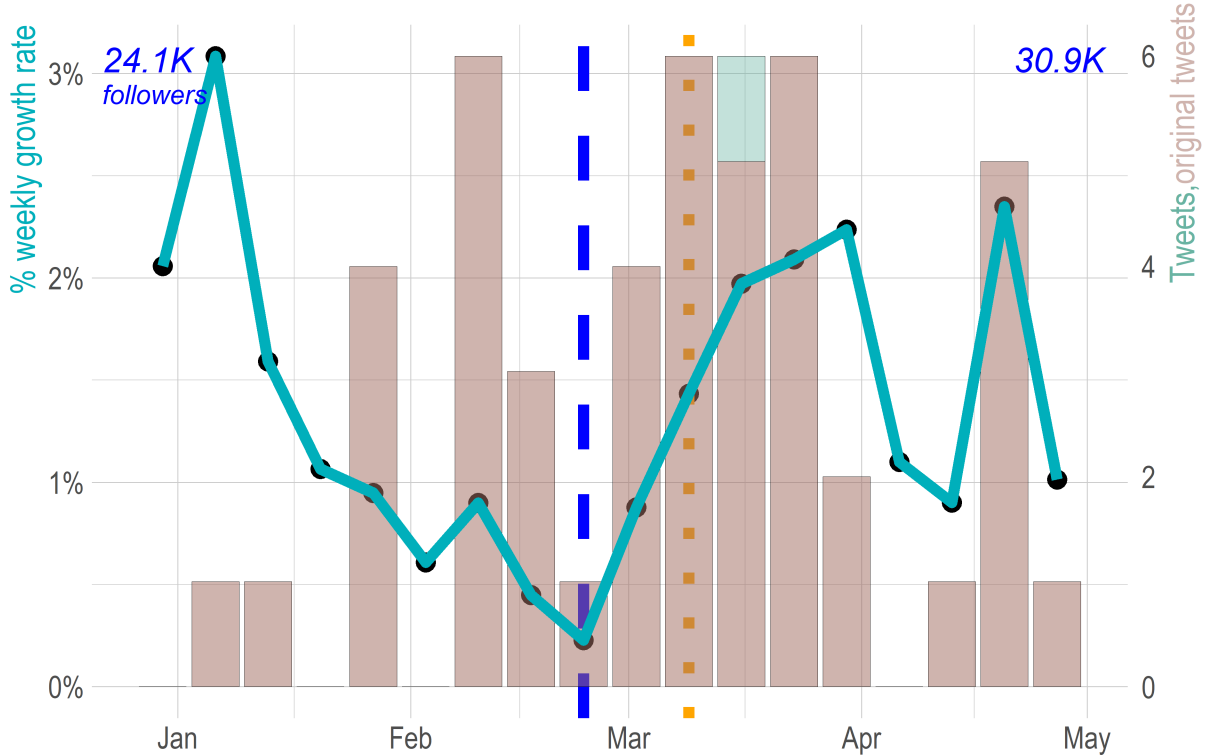

# Prime Minister Katrín Jakobsdóttir (Iceland)

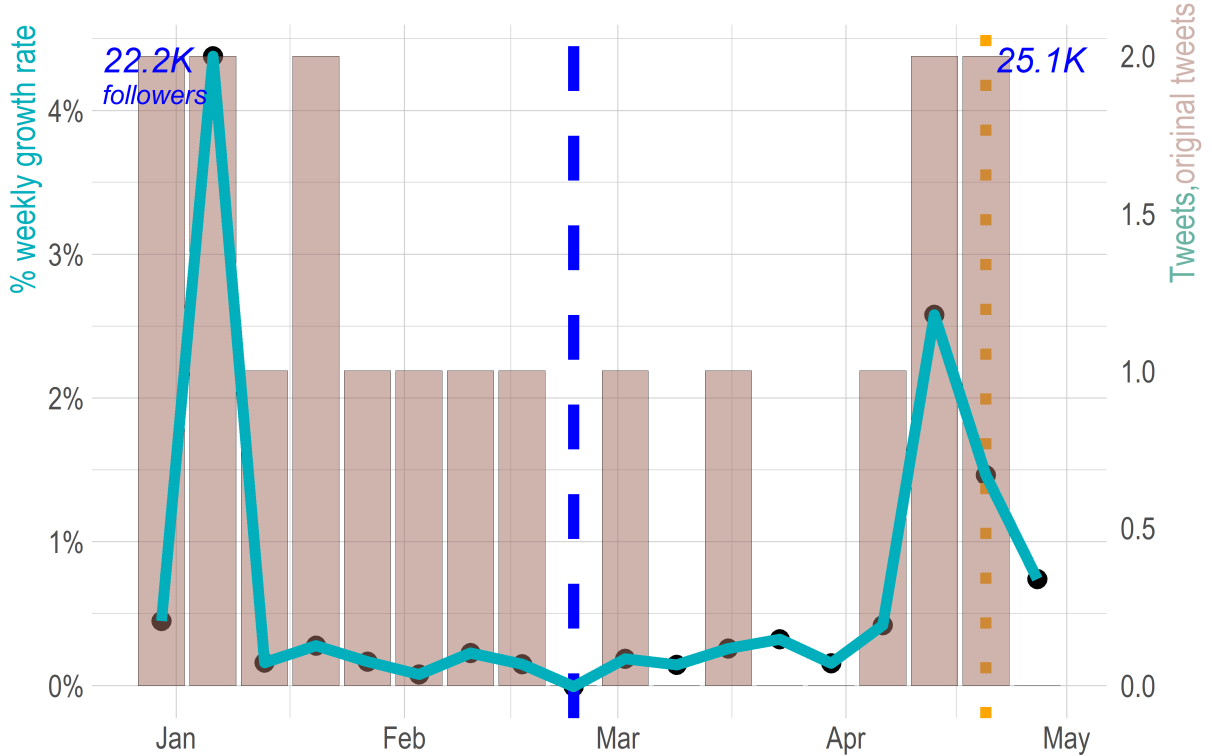

# President Shavkat Mirziyoyev (Uzbekistan)

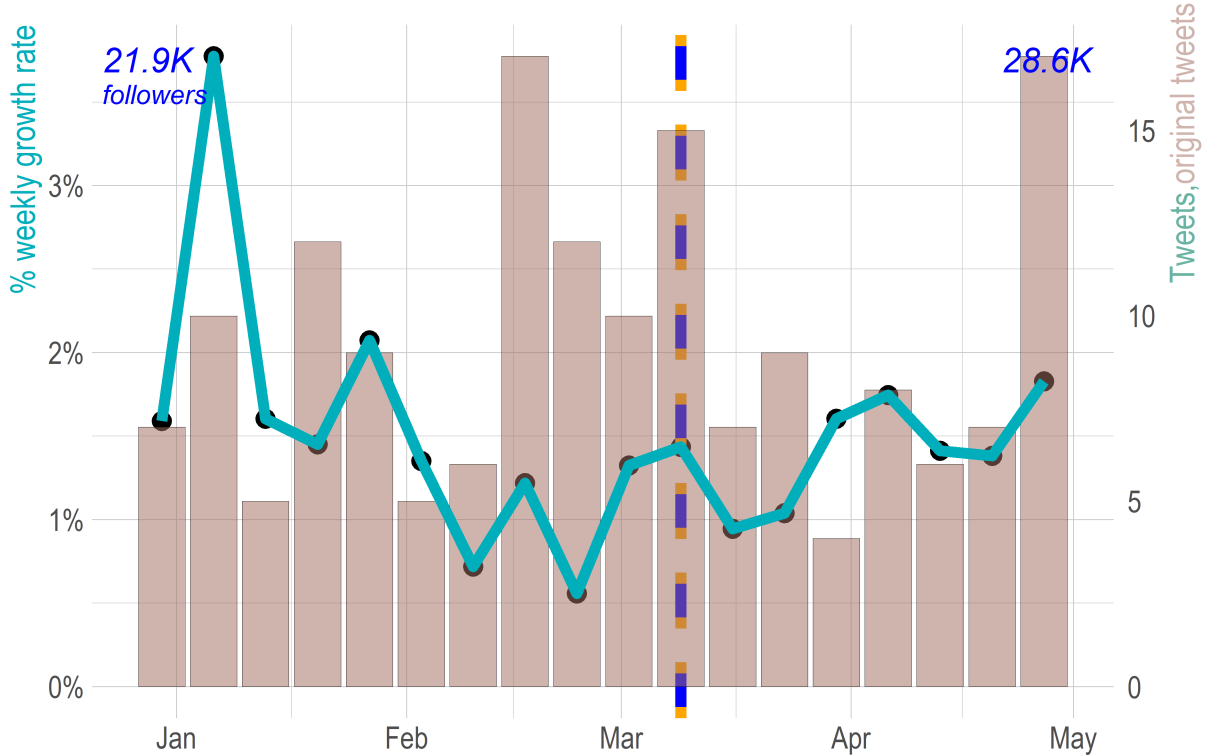

# President Ibrahim Boubacar Keïta (Mali)

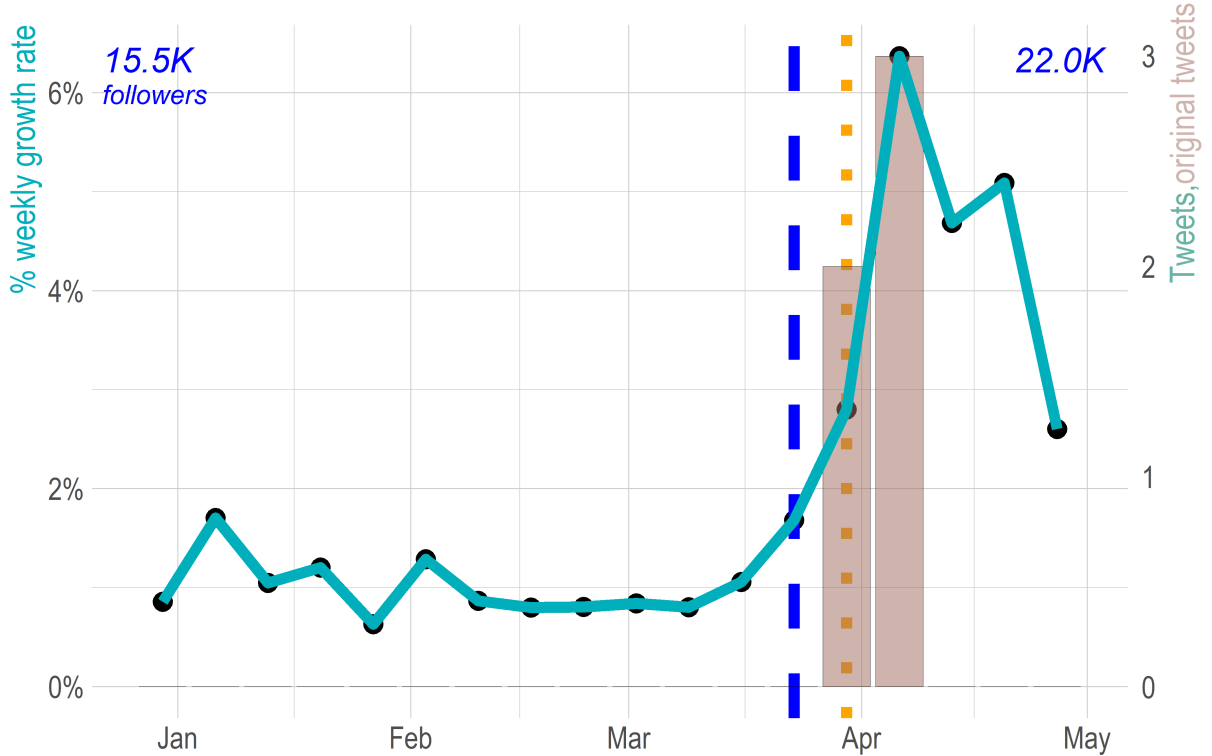

# President Adama Barrow (Gambia)

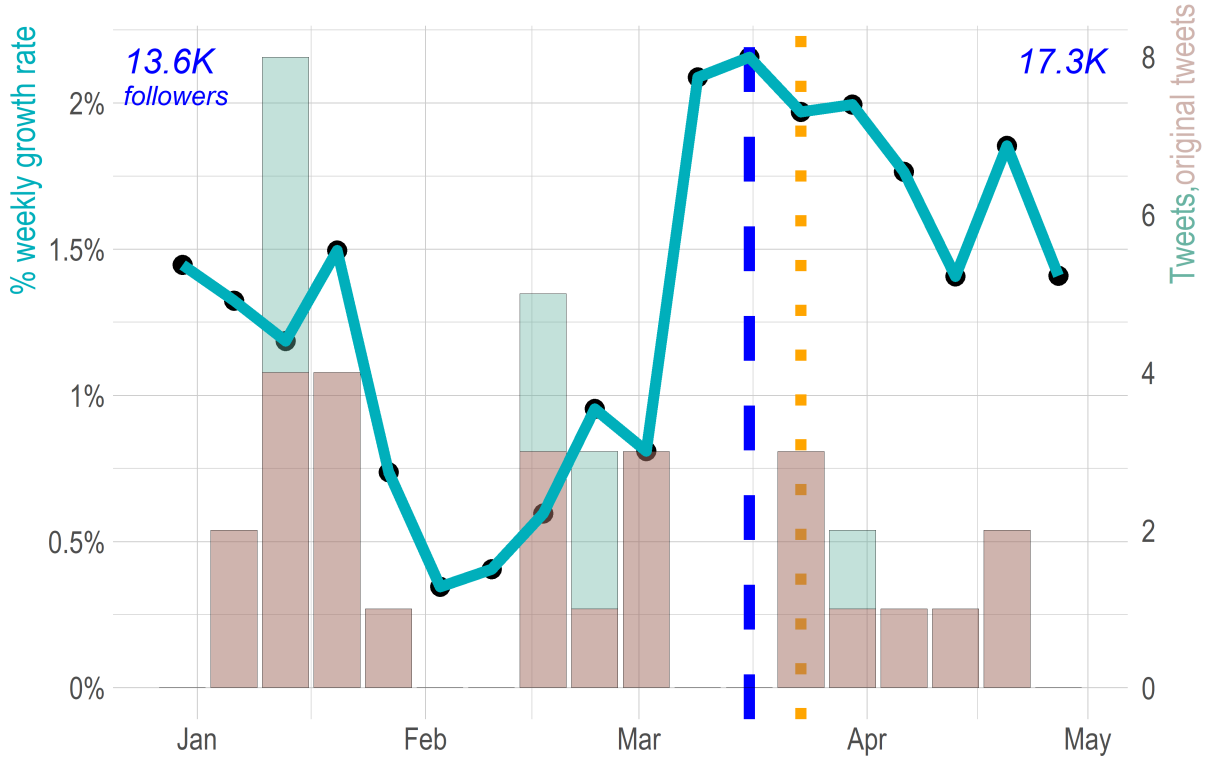

# President Andry Rajoelina (Madagascar)

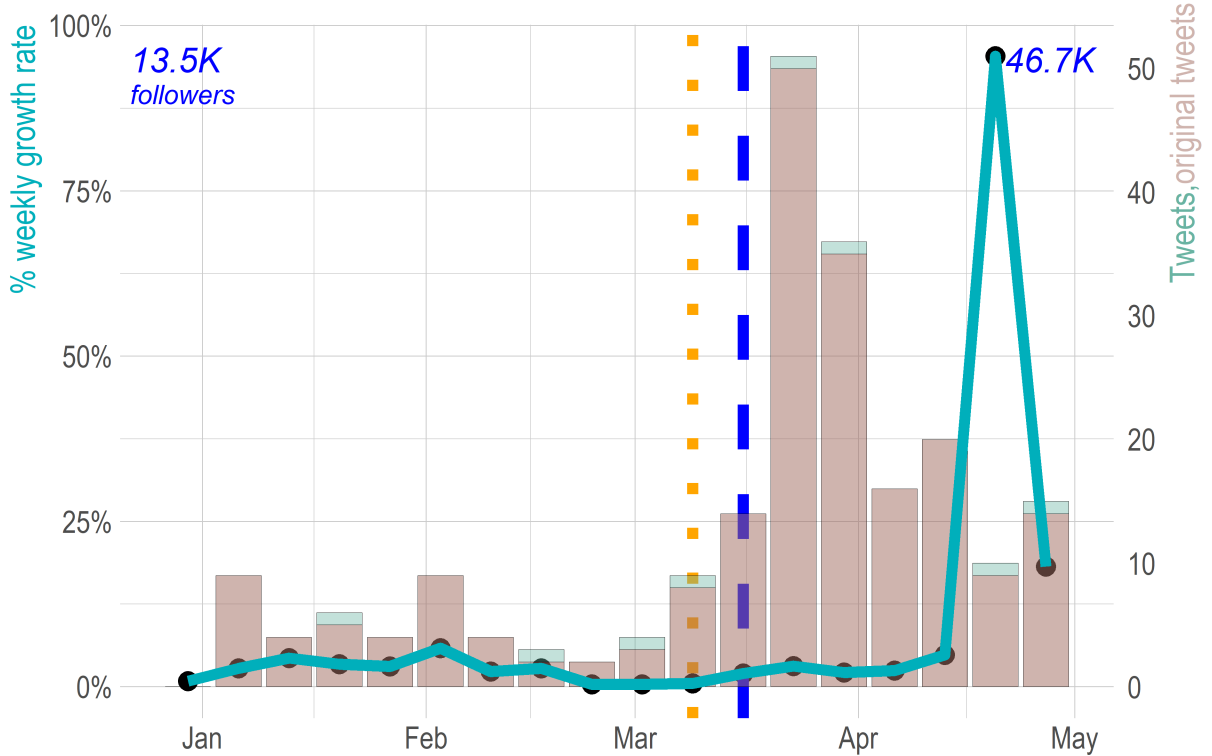



# Prime Minister Krišjānis Kariņš (Latvia)

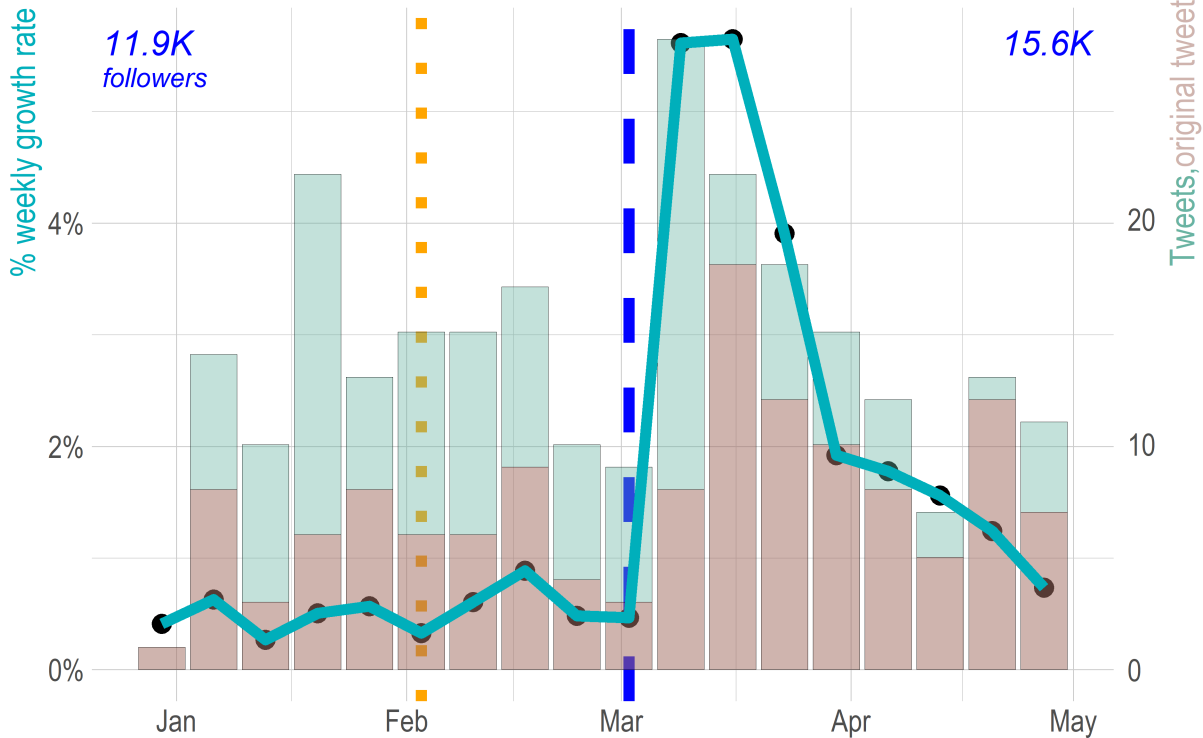

# Prime Minister Sophie Wilmès (Belgium)

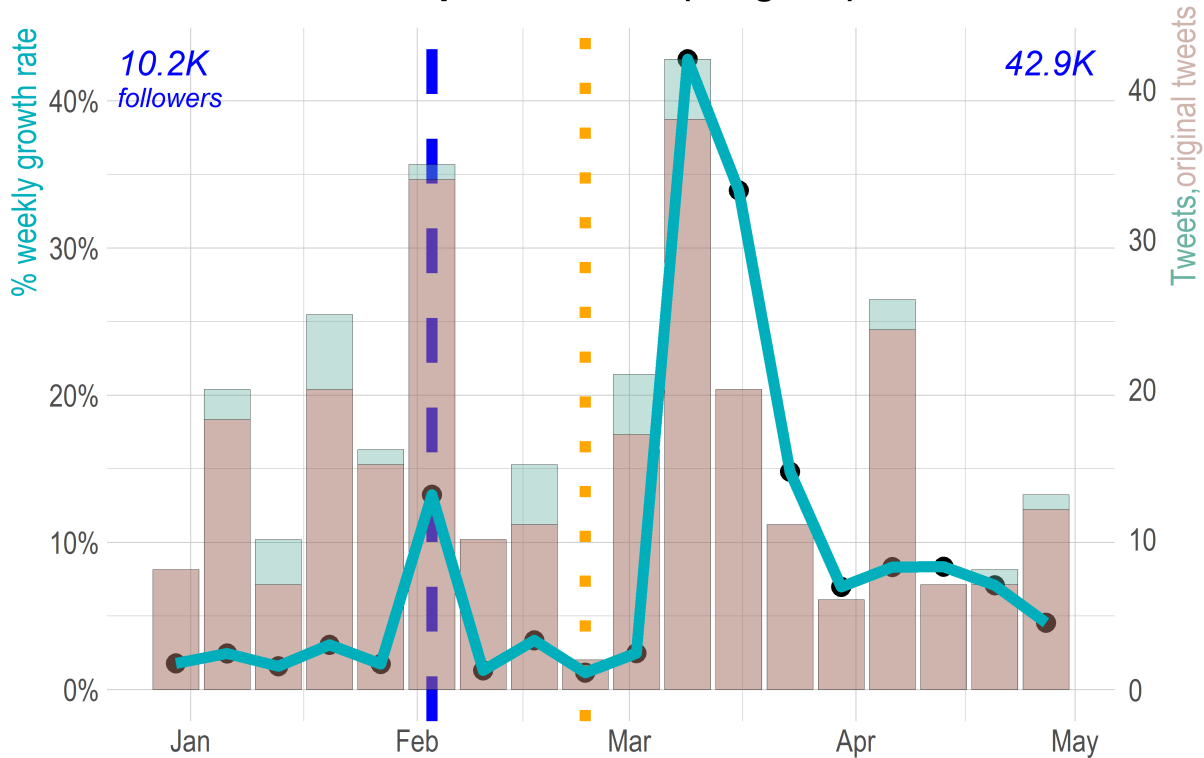

# Prime Minister Mia Mottley (Barbados)

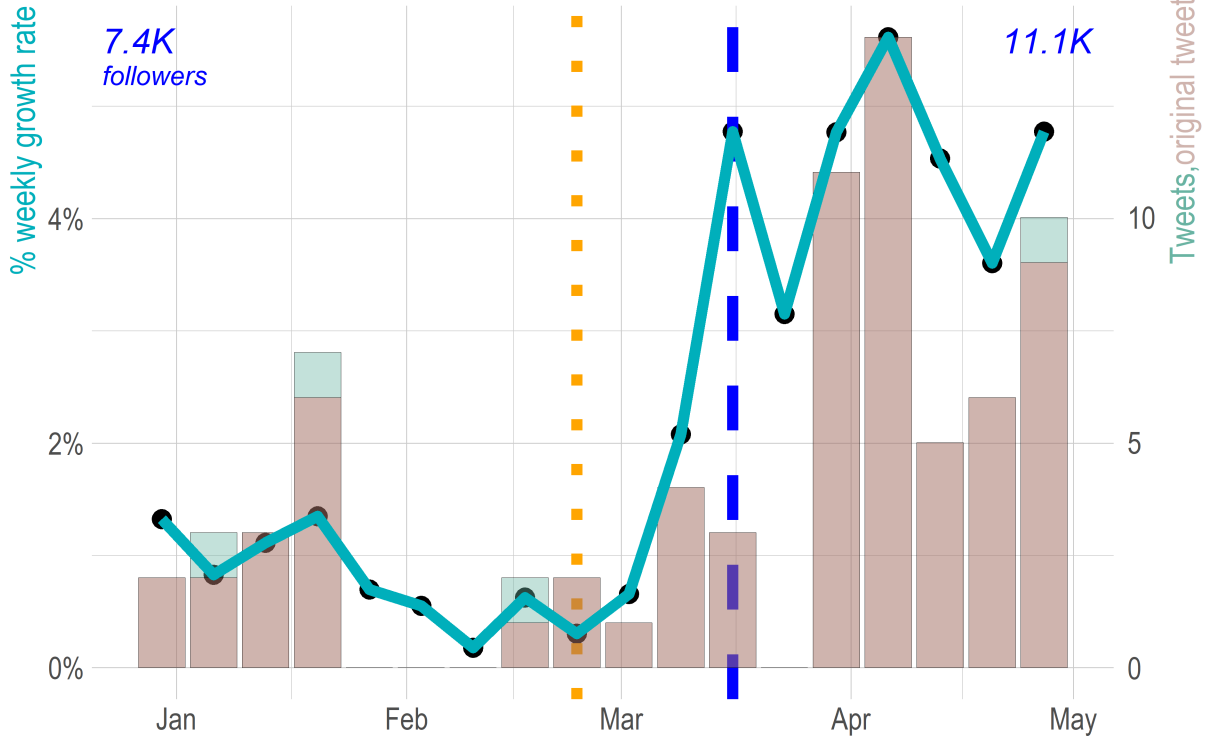

# President Gitanas Nauseda (Lithuania)

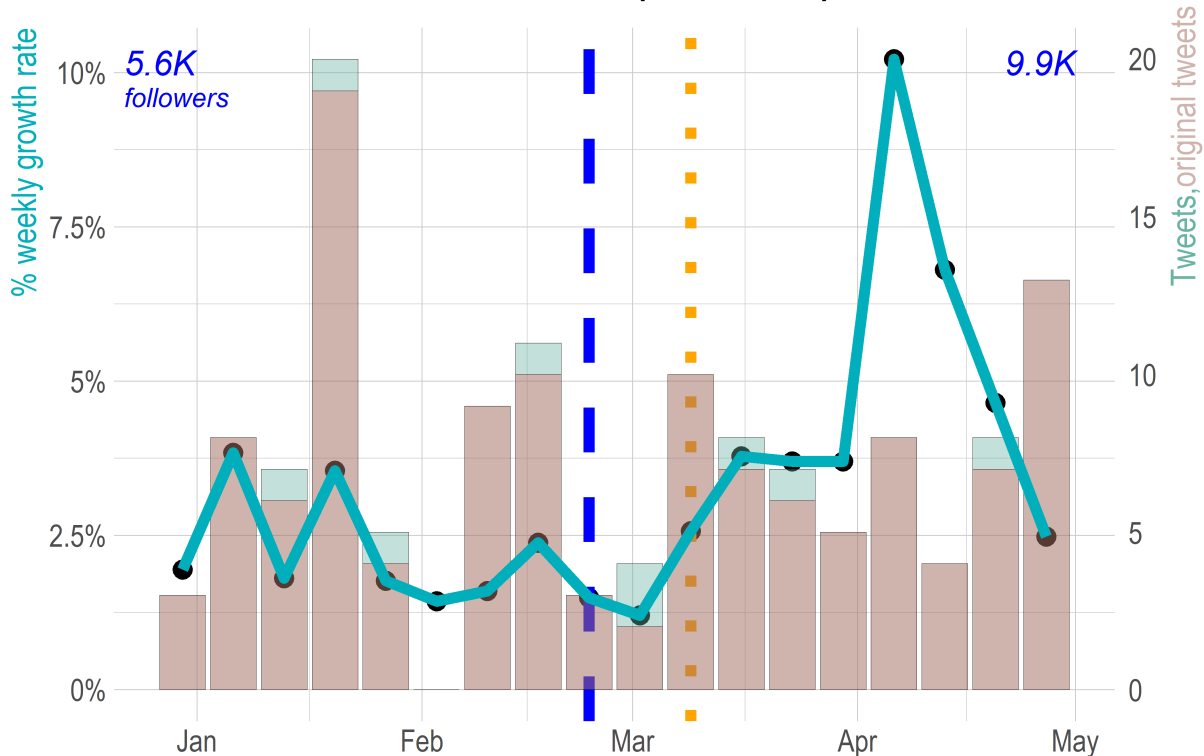

# President Julius Maada Bio (Sierra Leone)

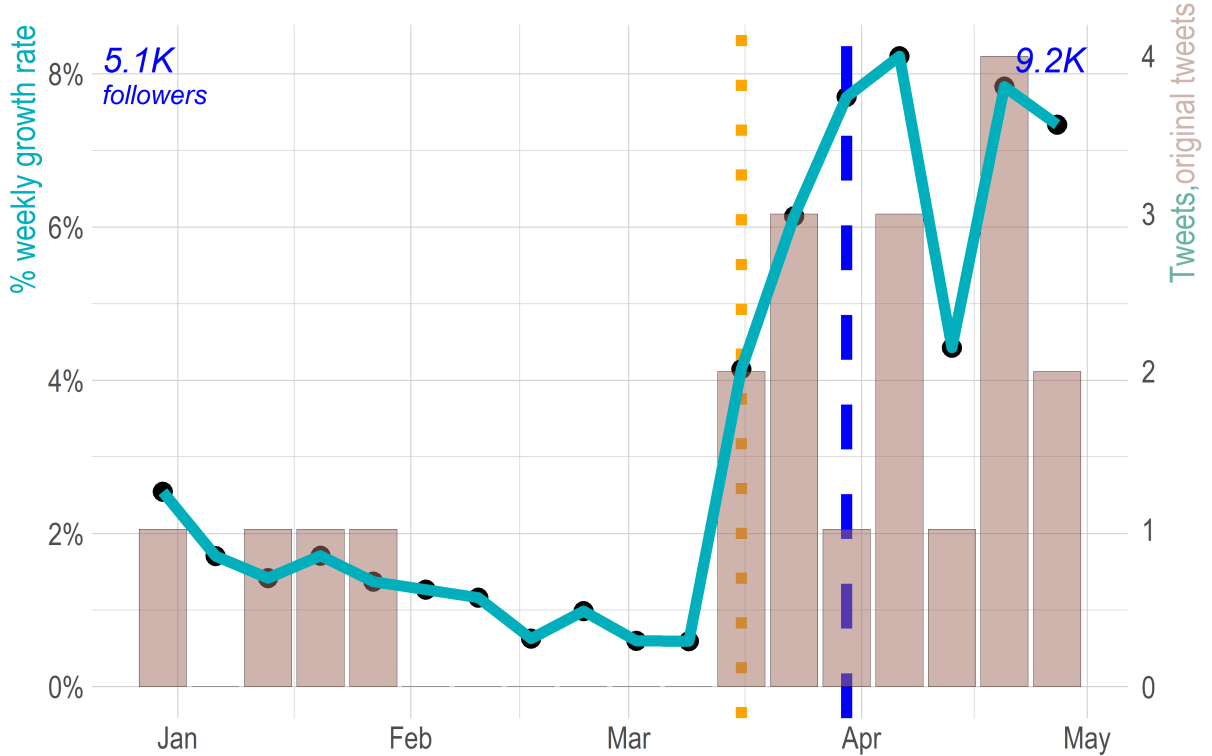

# Prime Minister Hubert Minnis (Bahamas)

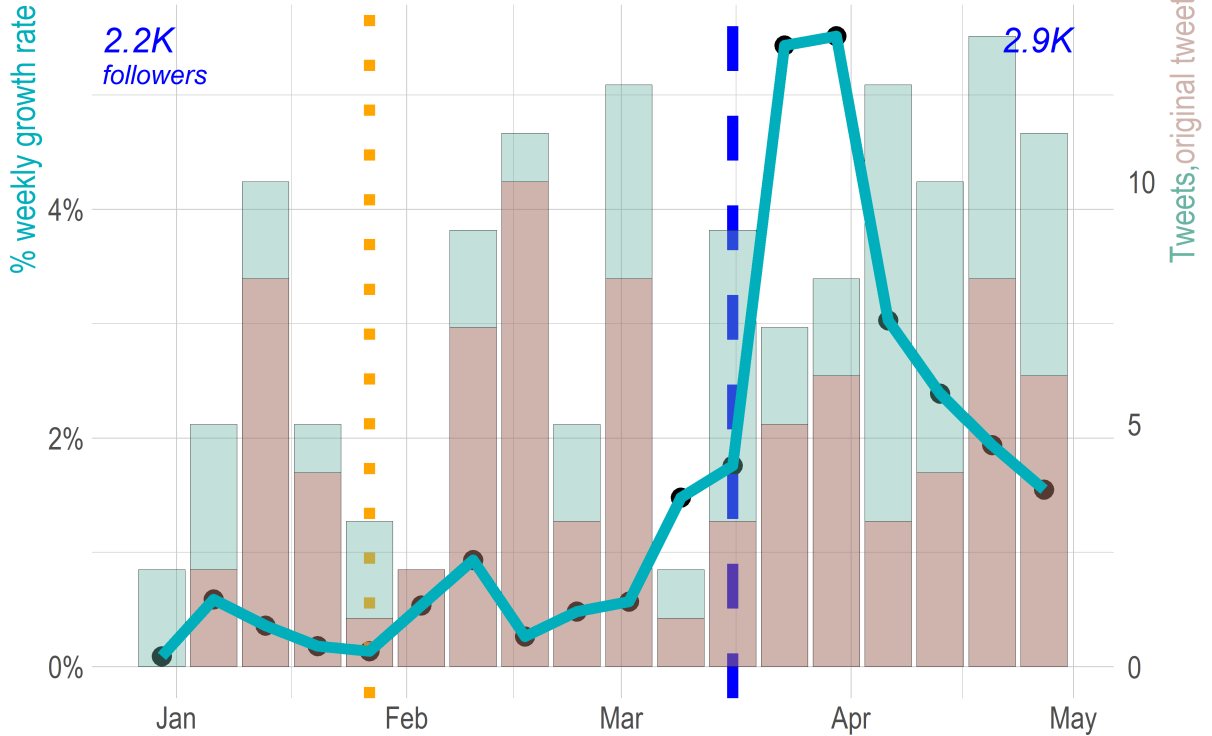

Supplement: mmc2.pdf [file mmc2.pdf]
